# Supplementary material for: Copper anchored on phosphorus g-C3N4 as a highly efficient photocatalyst for the synthesis of N-arylpyridin-2-amines
Source: Royal Society of Chemistry journal article supplement (doi:10.1039/d0gc03400b), 2021-01-01

## Supporting Information

for

A copper anchored on phosphorus g-C<sub>3</sub>N<sub>4</sub> as a highly efficient photocatalyst for synthesis of *N*-arylpyridin-2-amines

Jia-Qi Di, Mo Zhang, Yu-Xuan Chen, Jin-Xin Wang, Shan-Shan Geng, Jia-Qi Tang and Zhan-Hui Zhang\*

Hebei Key Laboratory of Organic Functional Molecules, National Demonstration Center for Experimental Chemistry Education, College of Chemistry and Material Science, Hebei Normal University, Shijiazhuang 050024, P. R. China.

### Table of Contents

|                                             |        |
|---------------------------------------------|--------|
| Spectra data of all products.....           | S2-S10 |
| Copies of NMR spectra for all products..... | S11-   |
|                                             | S46    |

## Spectra data of products:

### *N*-Phenylpyridin-2-amine (**3a**)

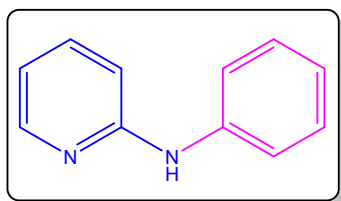

White solid, m.p.: 107-108 °C; IR (KBr): 3475, 1327, 1279, 1253, 1153, 1074, 1028, 767, 750, 697 cm<sup>-1</sup>; <sup>1</sup>H NMR (400 MHz, CDCl<sub>3</sub>) δ 8.25 (s, 1H), 7.54 (m, 1H), 7.38 (d, *J* = 4.8 Hz, 4H), 7.09 (m, 1H), 6.93 (d, *J* = 8.4 Hz, 1H), 6.83–6.76 (m, 1H), 6.71 (s, 1H) ppm; <sup>13</sup>C NMR (100 MHz, CDCl<sub>3</sub>) δ 156.0, 148.3, 140.4, 137.8, 129.2, 122.7, 120.2, 115.0, 108.1 ppm; ESI-MS: *m/z* = 171 (M + H)<sup>+</sup>.

### *N*-(*o*-Tolyl)pyridin-2-amine (**3b**)

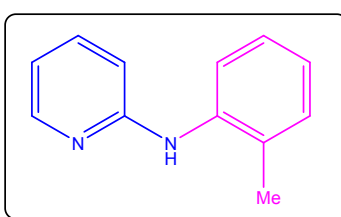

Brown solid, m.p. : 75-76 °C; IR (KBr): 3428, 2918, 1433, 1156, 1072, 779, 704, 699 cm<sup>-1</sup>; <sup>1</sup>H NMR (400 MHz, CDCl<sub>3</sub>) δ 8.12 (t, *J* = 4.4 Hz, 1H), 7.43 (m, 2H), 7.21 (m, 2H), 7.06 (t, *J* = 7.2 Hz, 1H), 6.73–6.58 (m, 2H), 6.46 (s, 1H), 2.27 (s, 3H) ppm; <sup>13</sup>C NMR (100 MHz, CDCl<sub>3</sub>) δ 156.8, 148.3, 138.4, 137.9, 131.5, 131.0, 126.8, 124.4, 122.9, 114.5, 107.5, 19.2 ppm; ESI-MS: *m/z* = 185 (M + H)<sup>+</sup>.

### *N*-(3-Methoxyphenyl)pyridin-2-amine (**3c**)

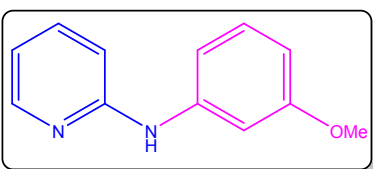

Semi solid; IR (KBr): 3470, 1595, 1151, 767 cm<sup>-1</sup>; <sup>1</sup>H NMR (400 MHz, CDCl<sub>3</sub>) δ 8.21 (s, 1H), 7.57–7.43 (m, 1H), 7.30–7.16 (m, 1H), 6.98–6.82 (m, 4H), 6.61 (dd, *J* = 8.0, 2.0 Hz, 1H), 6.50–6.32 (m, 1H), 3.81 (s, 3H) ppm; <sup>13</sup>C NMR (100 MHz, CDCl<sub>3</sub>) δ 160.5, 155.8, 148.2, 141.6, 137.9, 123.0, 115.2, 108.2, 108.1, 101.7, 55.3, 29.7 ppm; ESI-MS: *m/z* = 201 (M + H)<sup>+</sup>.

### *N*-(*m*-Tolyl)pyridin-2-amine (**3d**)

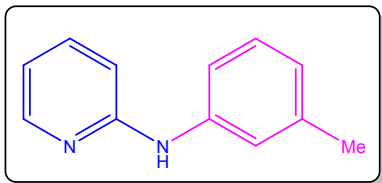

Semi solid; IR (KBr): 3422, 1577, 1150, 1075, 763 cm<sup>-1</sup>; <sup>1</sup>H NMR (400 MHz, CDCl<sub>3</sub>) δ 8.16 (s, 1H), 7.48 (d, *J* = 7.6 Hz, 1H), 7.21 (d, *J* = 7.6 Hz, 1H), 7.12 (s, 2H), 6.89 (t, *J* = 7.6 Hz, 3H), 6.72 (t, *J* = 6.0 Hz, 1H), 2.35 (s, 3H) ppm; <sup>13</sup>C NMR (100 MHz, CDCl<sub>3</sub>) δ 156.0, 147.7, 140.1, 139.3, 137.8, 128.9, 124.0, 117.2, 114.9, 108.4, 19.2 ppm; ESI-MS: *m/z* = 185 (M + H)<sup>+</sup>.

### *N*-(3-Fluorophenyl)pyridin-2-amine (**3e**)

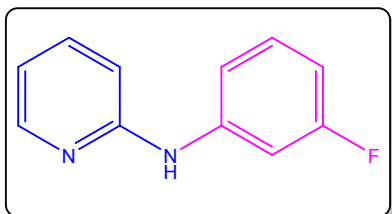

Yellow solid, m.p.: 65-66 °C; IR (KBr): 3421, 1588, 1338, 1152, 856, 768, 736, 682 cm<sup>-1</sup>; <sup>1</sup>H NMR (400 MHz, CDCl<sub>3</sub>) δ 8.23–8.20 (m, 1H),

7.50 (m, 1H), 7.40 (s, 1H), 7.23 (m, 2H), 7.03 (dd,  $J = 8.0, 1.2$  Hz, 1H), 6.86 (m, 1H), 6.80–6.62 (m, 2H) ppm;  $^{13}\text{C}$  NMR (100 MHz,  $\text{CDCl}_3$ )  $\delta$  164.7, 162.2, 155.4, 148.1, 142.5, 138.0, 130.6(d,  $J_{\text{C-F}} = 138.0$  Hz), 115.6(d,  $J_{\text{C-F}} = 23.0$  Hz), 115.0(d,  $J_{\text{C-F}} = 21.2$  Hz), 109.0, 106.4 ppm; ESI-MS:  $m/z = 189$  ( $\text{M} + \text{H}$ ) $^+$ .

*N*-(3-Chlorophenyl)pyridin-2-amine (**3f**)

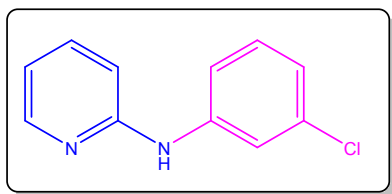

Yellow solid, m.p.: 102–103 °C; IR (KBr): 3462, 1640, 1479, 767, 747  $\text{cm}^{-1}$ ;  $^1\text{H}$  NMR (400 MHz,  $\text{CDCl}_3$ )  $\delta$  8.32–8.15 (m, 1H), 7.64–7.47 (m, 2H), 7.43 (s, 1H), 7.24–7.11 (m, 2H), 6.99 (m, 1H), 6.87 (m, 1H), 6.76 (m, 1H) ppm;  $^{13}\text{C}$  NMR (100 MHz,  $\text{CDCl}_3$ )  $\delta$  155.5, 148.3, 142.1,

138.2, 134.8, 130.2, 122.5, 119.4, 117.8, 115.7, 109.2 ppm; ESI-MS:  $m/z = 205$  ( $\text{M} + \text{H}$ ) $^+$ .

*N*-(3-Bromophenyl)pyridin-2-amine (**3g**)

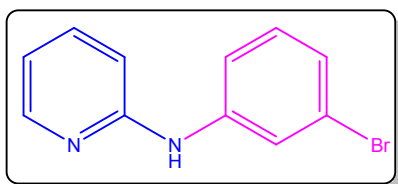

Brown yellow solid, m.p.: 87–88 °C; IR (KBr): 3409, 2184, 1584, 1478, 1441, 991, 767  $\text{cm}^{-1}$ ;  $^1\text{H}$  NMR (400 MHz,  $\text{CDCl}_3$ )  $\delta$  8.25–8.18 (m, 1H), 7.54–7.45 (m, 1H), 7.22–7.13 (m, 3H), 7.10–6.97 (m, 3H), 6.92 (d,  $J = 8.4$  Hz, 1H) ppm;  $^{13}\text{C}$  NMR (100 MHz,  $\text{CDCl}_3$ )  $\delta$  155.0,

141.7, 138.3, 138.10, 130.5, 122.9, 122.6, 122.4, 115.8, 114.8, 109.3 ppm; ESI-MS:  $m/z = 249$  ( $\text{M} + \text{H}$ ) $^+$ .

3-(Pyridin-2-ylamino)benzonitrile (**3h**)

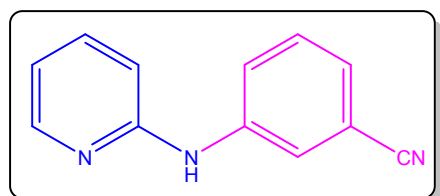

White solid, m.p.: 121–122 °C; IR (KBr): 3367, 2230, 1593, 771, 734, 682  $\text{cm}^{-1}$ ;  $^1\text{H}$  NMR (400 MHz,  $\text{CDCl}_3$ )  $\delta$  8.26 (dd,  $J = 4.8, 0.8$  Hz, 1H), 7.96–7.86 (m, 1H), 7.61–7.53 (m, 2H), 7.40 (m, 1H), 7.29–7.23 (m, 1H), 6.85 (m, 3H) ppm;  $^{13}\text{C}$  NMR (100 MHz,

$\text{CDCl}_3$ )  $\delta$  154.6, 147.9, 141.5, 138.3, 130.2, 125.1, 123.3, 121.8, 119.0, 116.5, 113.0, 110.1 ppm; ESI-MS:  $m/z = 196$  ( $\text{M} + \text{H}$ ) $^+$ .

*N*-(3-Nitrophenyl)pyridin-2-amine (**3i**)

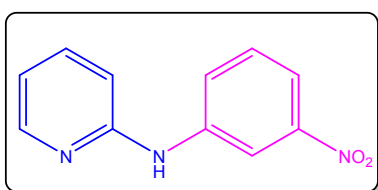

Yellow solid, m.p.: 115–116 °C; IR (KBr): 3426, 1604, 1530, 1515, 1344, 878, 734  $\text{cm}^{-1}$ ;  $^1\text{H}$  NMR (400 MHz,  $\text{CDCl}_3$ )  $\delta$  8.40 (s, 1H), 8.26 (d,  $J = 3.2$  Hz, 1H), 7.75 (m, 2H), 7.57 (t,  $J = 7.6$  Hz, 1H), 7.41 (t,  $J = 7.2$  Hz, 2H), 6.85 (d,  $J = 8.8$  Hz, 2H) ppm;  $^{13}\text{C}$  NMR (100 MHz,  $\text{CDCl}_3$ )  $\delta$

154.6, 148.9, 148.0, 142.0, 138.2, 133.1, 129.8, 124.5, 116.4, 113.0, 110.2 ppm; ESI-MS:  $m/z = 216$  ( $\text{M} + \text{H}$ ) $^+$ .

*N*-(4-Ethylphenyl)pyridin-2-amine (**3j**)

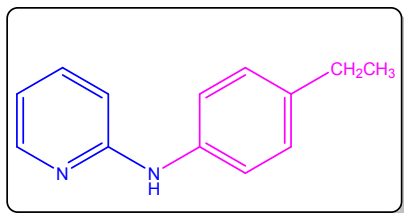

Yellow solid, m.p.: 108-109 °C; IR (KBr): 3390, 2944, 1598, 1422, 1230, 861, 788, 662  $\text{cm}^{-1}$ ;  $^1\text{H}$  NMR (400 MHz,  $\text{CDCl}_3$ )  $\delta$  8.18 (s, 1H), 7.46 (t,  $J = 7.2$  Hz, 1H), 7.23 (d,  $J = 8.4$  Hz, 2H), 7.18 (d,  $J = 8.4$  Hz, 2H), 6.83 (d,  $J = 8.4$  Hz, 1H), 6.73–6.63 (m, 1H), 6.57 (s, 1H), 2.63 (q,  $J = 7.6$  Hz, 2H), 1.24 (t,  $J = 7.2$  Hz, 3H) ppm;  $^{13}\text{C}$  NMR (100

MHz,  $\text{CDCl}_3$ )  $\delta$  156.5, 139.3, 137.9, 128.7, 121.2, 121.0, 114.6, 112.5, 107.9, 28.3, 15.8 ppm; ESI-MS:  $m/z = 199$  (M + H) $^+$ .

***N*-(4-(*tert*-Butyl)phenyl)pyridin-2-amine (3k)**

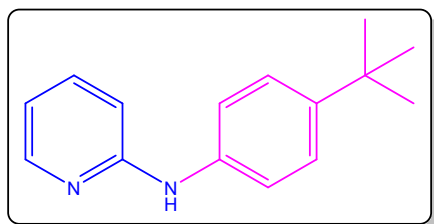

Brown solid, m.p.: 114-115 °C; IR (KBr): 3384, 1594, 1571, 1455, 1363, 1335, 1280, 1267, 898, 852, 841, 809, 770, 739  $\text{cm}^{-1}$ ;  $^1\text{H}$  NMR (400 MHz,  $\text{CDCl}_3$ )  $\delta$  8.16 (s, 1H), 7.44 (t,  $J = 8.0$  Hz, 1H), 7.37–7.31 (m, 2H), 7.23 (d,  $J = 6.8$  Hz, 2H), 7.05 (s, 1H), 6.86 (d,

$J = 8.4$  Hz, 1H), 6.68 (s, 1H), 1.32 (s, 9H) ppm;  $^{13}\text{C}$  NMR (100 MHz,  $\text{CDCl}_3$ )  $\delta$  156.5, 148.1, 146.1, 138.0, 137.7, 126.0, 120.7, 114.7, 108.1, 34.4, 31.4 ppm; ESI-MS:  $m/z = 227$  (M + H) $^+$ .

***N*-(4-Fluorophenyl)pyridin-2-amine (3l)**

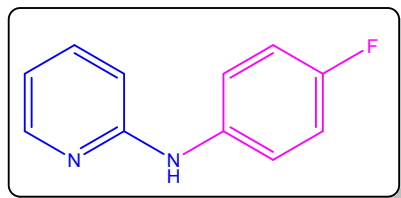

Brown solid, m.p.: 122-123 °C; IR (KBr): 3415, 1588, 1331, 1265, 1152, 878, 768, 738, 682  $\text{cm}^{-1}$ ;  $^1\text{H}$  NMR (400 MHz,  $\text{CDCl}_3$ )  $\delta$  8.18 (s, 1H), 7.48 (t,  $J = 7.6$  Hz, 1H), 7.30 (dd,  $J = 8.4, 4.8$  Hz, 2H), 7.03 (m, 2H), 6.73 (s, 2H), 6.62 (s, 1H) ppm;  $^{13}\text{C}$  NMR (100 MHz,  $\text{CDCl}_3$ )

$\delta$  159.0 (d,  $J_{\text{C-F}} = 240.7$  Hz), 156.6, 148.1, 137.9, 123.1, 116.1, 115.9 (d,  $J_{\text{C-F}} = 22.3$  Hz), 114.8, 107.9 ppm; ESI-MS:  $m/z = 189$  (M + H) $^+$ .

***N*-(4-Chlorophenyl)pyridin-2-amine (3m)**

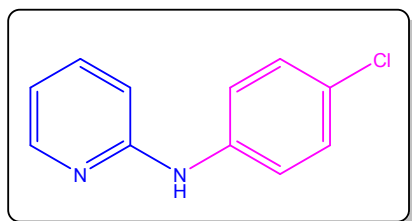

Yellow solid, m.p.: 99-100 °C; IR (KBr): 3427, 1629, 1589, 1574, 1330, 1287, 1157, 1089, 1073, 840, 809, 767, 704  $\text{cm}^{-1}$ ;  $^1\text{H}$  NMR (400 MHz,  $\text{CDCl}_3$ )  $\delta$  8.19 (d,  $J = 4.8$  Hz, 1H), 7.56–7.39 (m, 1H), 7.32–7.17 (m, 4H), 7.07 (d,  $J = 4.0$  Hz, 1H), 6.88–6.67 (m, 2H) ppm;  $^{13}\text{C}$

NMR (100 MHz,  $\text{CDCl}_3$ )  $\delta$  155.7, 148.1, 139.2, 138.0, 129.3, 127.42, 121.4, 115.4, 108.8 ppm; ESI-MS:  $m/z = 205$  (M + H) $^+$ .

***N*-(4-(Trifluoromethyl)phenyl)pyridin-2-amine (3n)**

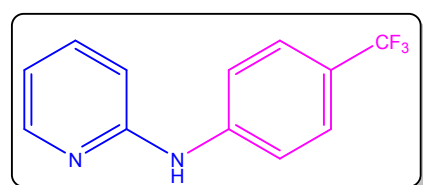

White solid, m.p.: 94-95 °C; IR (KBr): 3471, 1605, 1327, 1167,

1152, 849, 819, 771, 732  $\text{cm}^{-1}$ ;  $^1\text{H}$  NMR (400 MHz,  $\text{CDCl}_3$ )  $\delta$  8.27 (s, 1H), 7.57 (dd,  $J = 12.9, 5.1$  Hz, 3H), 7.48 (d,  $J = 8.6$  Hz, 2H), 7.01–6.79 (m, 3H) ppm;  $^{13}\text{C}$  NMR (100 MHz,  $\text{CDCl}_3$ )  $\delta$  154.7, 148.3, 143.9, 138.0, 137.8, 126.5 (q,  $J_{\text{C-F}} = 270.0$  Hz), 123.5 (q,  $J_{\text{C-F}} = 33.0$  Hz), 118.3, 116.4, 109.7 ppm; ESI-MS:  $m/z = 239$  ( $\text{M} + \text{H}$ ) $^+$ .

*N*-(3,4-Difluorophenyl)pyridin-2-amine (**3o**)

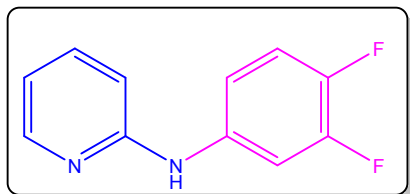

Yellow solid, m.p.: 101-102  $^{\circ}\text{C}$ ; IR (KBr): 3446, 1602, 1587, 1347, 1306, 1283, 1258, 1206, 1160, 1150, 789, 770, 753, 735, 654  $\text{cm}^{-1}$ ;  $^1\text{H}$  NMR (400 MHz,  $\text{CDCl}_3$ )  $\delta$  8.20 (s, 1H), 7.52 (t,  $J = 7.6$  Hz, 1H), 7.39 (dd,  $J = 10.8, 8.4$  Hz, 1H), 7.16–7.03 (m, 1H), 6.98 (s, 1H), 6.82–6.64 (m, 3H) ppm;  $^{13}\text{C}$  NMR (100 MHz,  $\text{CDCl}_3$ )  $\delta$  155.5, 150.4 (d,  $J_{\text{C-F}} = 245.0$  Hz), 148.1, 146.1 (d,  $J_{\text{C-F}} = 242.0$  Hz), 138.0, 137.8, 137.2, 117.5, 115.7, 109.4, 108.7 ppm; ESI-MS:  $m/z = 207$  ( $\text{M} + \text{H}$ ) $^+$ .

*N*-(3,4-Dichlorophenyl)pyridin-2-amine (**3p**)

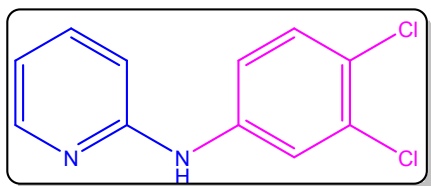

White solid, m.p.: 147-148  $^{\circ}\text{C}$ ; IR (KBr): 3482, 1592, 879, 845, 814, 761, 739  $\text{cm}^{-1}$ ;  $^1\text{H}$  NMR (400 MHz,  $\text{CDCl}_3$ )  $\delta$  8.22 (s, 1H), 7.55 (dd,  $J = 21.2, 14.2$  Hz, 2H), 7.33 (d,  $J = 8.8$  Hz, 1H), 7.19 (d,  $J = 8.8$  Hz, 1H), 7.05 (s, 1H), 6.80 (d,  $J = 7.2$  Hz, 2H) ppm;  $^{13}\text{C}$  NMR (100 MHz,  $\text{CDCl}_3$ )  $\delta$  155.0, 148.1, 140.3, 138.1, 132.8, 130.6, 125.0, 120.9, 118.8, 116.1, 109.5 ppm; ESI-MS:  $m/z = 240$  ( $\text{M} + \text{H}$ ) $^+$ .

*N*-(3,5-Dimethoxyphenyl)pyridin-2-amine (**3q**)

White solid, m.p.: 107-108  $^{\circ}\text{C}$ ; IR (KBr): 3470, 1592, 1455, 1203, 1151, 770  $\text{cm}^{-1}$ ;  $^1\text{H}$  NMR (400 MHz,  $\text{CDCl}_3$ )  $\delta$  8.18 (s, 1H), 7.52 (t,  $J = 8$  Hz, 1H), 6.96 (d,  $J = 8.8$  Hz, 2H), 6.75 (s, 1H), 6.51 (s, 2H), 6.19 (s, 1H), 3.79 (s, 6H) ppm;  $^{13}\text{C}$  NMR (100 MHz,  $\text{CDCl}_3$ )  $\delta$  161.5, 155.5, 148.4, 147.4, 141.9, 138.3, 98.7, 95.2, 55.3, 29.7 ppm; ESI-MS:  $m/z = 231$  ( $\text{M} + \text{H}$ ) $^+$ .

*N*-(3,5-dimethylphenyl)pyridin-2-amine (**3r**)

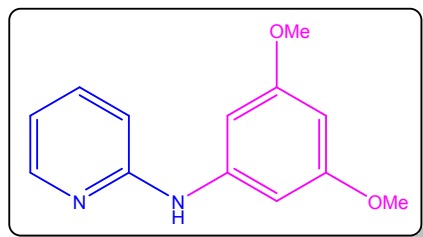

$\delta$  8.20 (s, 1H), 7.65–7.42 (m, 1H), 6.92

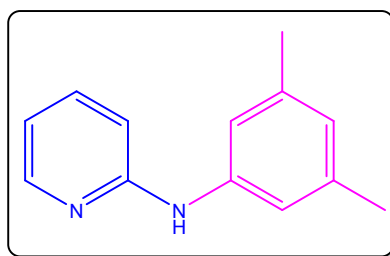

Brown solid, m.p.: 72-73  $^{\circ}\text{C}$ ; IR (KBr): 3446, 2922, 1595, 1443, 1339, 835, 770  $\text{cm}^{-1}$ ;  $^1\text{H}$  NMR (400 MHz,  $\text{CDCl}_3$ ) (s, 3H), 6.71 (s, 3H), 2.31 (s,

6H) ppm;  $^{13}\text{C}$  NMR (100 MHz,  $\text{CDCl}_3$ )  $\delta$  156.2, 148.3, 140.3, 139.0, 137.8, 124.9, 118.5, 114.9, 108.3, 21.5 ppm; ESI-MS:  $m/z = 199$  ( $\text{M} + \text{H}$ ) $^+$ .

*N*-(3,5-Difluorophenyl)pyridin-2-amine (**3s**)

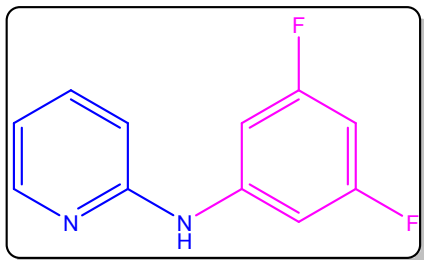

Yellow solid, m.p.: 109-110 °C; IR (KBr): 3438, 1637, 1585, 1545, 1285, 1155, 1111, 835, 804, 763, 738, 718, 670  $\text{cm}^{-1}$ ;  $^1\text{H}$  NMR (400 MHz,  $\text{CDCl}_3$ )  $\delta$  8.31–8.15 (m, 1H), 7.60–7.37 (m, 2H), 6.96 (d,  $J = 9.2$  Hz, 2H), 6.91–6.71 (m, 2H), 6.41 (m, 1H) ppm;  $^{13}\text{C}$  NMR (100 MHz,  $\text{CDCl}_3$ )  $\delta$  163.6 (d,  $J_{\text{C-F}} = 244.0$  Hz), 143.3, 138.0 (d,  $J_{\text{C-F}} = 17.0$  Hz), 116.3 (d,  $J_{\text{C-F}} = 17.8$  Hz), 110.0 (d,  $J_{\text{C-F}} = 19.0$  Hz), 101.5, 97.2, 96.9, 96.7 ppm; ESI-MS:  $m/z = 207$  ( $\text{M} + \text{H}$ ) $^+$ .

*N*-(3,5-Dichlorophenyl)pyridin-2-amine (**3t**)

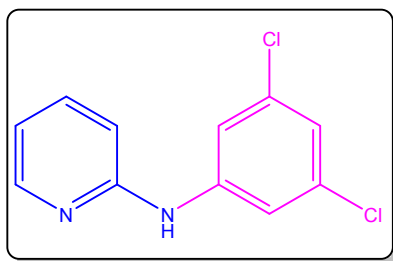

Yellow solid, m.p.: 162-163 °C; IR (KBr): 3462, 1640, 1444, 761  $\text{cm}^{-1}$ ;  $^1\text{H}$  NMR (400 MHz,  $\text{CDCl}_3$ )  $\delta$  8.26 (d,  $J = 4.4$  Hz, 1H), 7.56 (m, 1H), 7.35 (d,  $J = 1.2$  Hz, 2H), 6.97 (s, 1H), 6.83 (m, 2H), 6.62 (s, 1H) ppm;  $^{13}\text{C}$  NMR (100 MHz,  $\text{CDCl}_3$ )  $\delta$  154.4, 148.2, 142.7, 138.1, 135.3, 121.9, 119.7, 116.5, 110.0 ppm; ESI-MS:  $m/z = 240$  ( $\text{M} + \text{H}$ ) $^+$ .

*N*-(4-Fluoro-3-methylphenyl)pyridin-2-amine (**3u**)

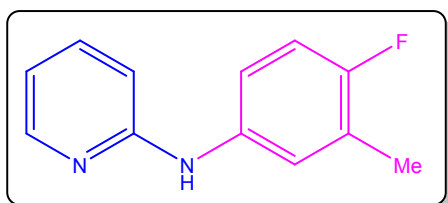

Yellow solid, m.p.: 73-74 °C; IR (KBr): 3424, 2926, 1583, 1461, 1442, 1336, 1279, 1210, 1150, 882, 810, 763, 704  $\text{cm}^{-1}$ ;  $^1\text{H}$  NMR (400 MHz,  $\text{CDCl}_3$ )  $\delta$  8.16 (d,  $J = 4.4$  Hz, 1H), 7.45 (t,  $J = 7.8$  Hz, 1H), 7.18–7.06 (m, 2H), 6.97 (m, 2H), 6.84–6.38 (m, 2H), 2.26 (s, 3H) ppm;  $^{13}\text{C}$  NMR (100 MHz,  $\text{CDCl}_3$ )  $\delta$  157.6 (d,  $J_{\text{C-F}} = 240.0$  Hz), 156.7, 148.2, 137.9, 136.1, 132.3, 128.9, 125.5, 115.5, 114.6 (d,  $J_{\text{C-F}} = 14.0$  Hz), 107.7 (d,  $J_{\text{C-F}} = 18.0$  Hz), 14.6 ppm; ESI-MS:  $m/z = 203$  ( $\text{M} + \text{H}$ ) $^+$ .

*N*-(Naphthalen-1-yl)pyridin-2-amine (**3v**)

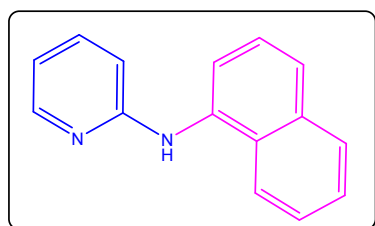

Yellow solid, m.p.: 102-103 °C; IR (KBr): 3474, 1632, 1439, 722, 458  $\text{cm}^{-1}$ ;  $^1\text{H}$  NMR (400 MHz,  $\text{CDCl}_3$ )  $\delta$  8.20 (s, 1H), 8.06 (d,  $J = 8.0$  Hz, 1H), 7.89 (d,  $J = 7.6$  Hz, 1H), 7.71 (d,  $J = 8.0$  Hz, 1H), 7.61–7.45 (m, 5H), 6.92 (s, 1H), 6.71 (t,  $J = 5.6$  Hz, 1H), 6.62 (d,  $J = 8.4$  Hz, 1H) ppm;  $^{13}\text{C}$  NMR (100 MHz,  $\text{CDCl}_3$ )  $\delta$  157.7, 148.6, 137.9, 136.0, 134.7, 129.2, 128.5, 126.5, 125.4, 122.4, 120.3, 114.8, 114.7, 107.7 ppm; ESI-MS:  $m/z = 221$  ( $\text{M} + \text{H}$ ) $^+$ .

***N*-(Naphthalen-2-yl)pyridin-2-amine (3w)**

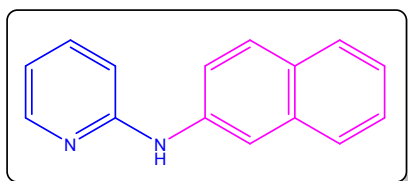

Light brown solid; m.p.: 138-139 °C; IR (KBr): 3462, 1597, 812, 743  $\text{cm}^{-1}$ ;  $^1\text{H}$  NMR (400 MHz,  $\text{CDCl}_3$ )  $\delta$  8.26 (s, 1H), 7.86–7.68 (m, 4H), 7.54 (m, 1H), 7.47–7.31 (m, 3H), 6.98 (d,  $J = 8.4$  Hz, 1H), 6.79 (m, 2H) ppm;  $^{13}\text{C}$  NMR (100 MHz,  $\text{CDCl}_3$ )  $\delta$  155.8, 148.4, 138.0, 134.3, 130.0, 129.1, 127.7, 127.6, 127.1, 127.0, 124.5, 121.2, 115.5 ppm; ESI-MS:  $m/z = 221$  (M + H) $^+$ .

***N*-(Thiophen-3-yl)pyridin-2-amine (3x)**

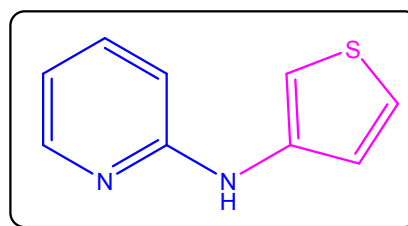

Semi solid, IR (KBr): 3428, 1602, 1481, 1441, 1283, 768  $\text{cm}^{-1}$ ;  $^1\text{H}$  NMR (400 MHz,  $\text{CDCl}_3$ )  $\delta$  8.20 (dd,  $J = 4.8, 1.2$  Hz, 1H), 7.51–7.45 (m, 1H), 7.30–7.20 (m, 3H), 6.99 (dd,  $J = 4.8, 1.2$  Hz, 2H), 6.84–6.61 (m, 2H) ppm;  $^{13}\text{C}$  NMR (100 MHz,  $\text{CDCl}_3$ )  $\delta$  156.1, 148.1, 138.7, 137.8, 124.8, 123.0, 114.5, 108.2, 108.0 ppm; ESI-MS:  $m/z = 176$  (M + H) $^+$ .

***N*-(Dibenzo[*b,d*]furan-3-yl)pyridin-2-amine (3y)**

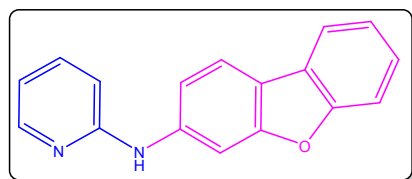

Yellow-brown solid, m.p.: 110-111°C; IR (KBr): 3447, 1636, 1603, 1522, 1450, 1289, 1189, 1120  $\text{cm}^{-1}$ ;  $^1\text{H}$  NMR (400 MHz,  $\text{CDCl}_3$ )  $\delta$  8.28 (d,  $J = 4.4$  Hz, 1H), 8.02–7.89 (m, 2H), 7.62 (dd,  $J = 7.6, 0.8$  Hz, 1H), 7.60–7.54 (m, 2H), 7.50–7.42 (m, 1H), 7.40–7.29 (m, 2H), 7.21 (s, 1H), 6.92 (d,  $J = 8.4$  Hz, 1H), 6.81 (dd,  $J = 6.8, 5.2$  Hz, 1H) ppm;  $^{13}\text{C}$  NMR (100 MHz,  $\text{CDCl}_3$ )  $\delta$  167.7, 155.8, 155.4, 147.9, 138.0, 130.9, 128.9, 127.2, 126.1, 124.7, 123.4, 123.0, 115.6, 114.4, 111.8, 109.6 ppm; ESI-MS:  $m/z = 261$  (M + H) $^+$ .

***N*-(Pyridin-3-yl)pyridin-2-amine (3z)**

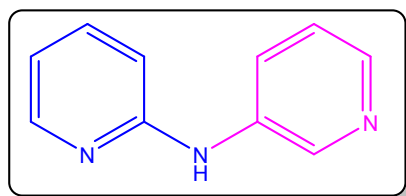

White Semi-solid; IR (KBr): 3530, 3065, 3017, 1503, 1322, 1283, 1150, 860, 762, 738  $\text{cm}^{-1}$ ;  $^1\text{H}$  NMR (400 MHz,  $\text{CDCl}_3$ )  $\delta$  8.13 (d,  $J = 4.1$  Hz, 1H), 7.49–7.35 (m, 1H), 7.30–7.23 (m, 3H), 7.06–6.93 (m, 1H), 6.90–6.77 (m, 2H), 6.66 (dd,  $J = 8.8, 3.6$  Hz, 1H) ppm;  $^{13}\text{C}$  NMR (100 MHz,  $\text{CDCl}_3$ )  $\delta$  156.0, 148.1, 140.4, 137.9, 129.3, 123.0, 120.5, 115.0, 108.3 ppm; ESI-MS:  $m/z = 172$  (M + H) $^+$ .

**4-Methyl-*N*-phenylpyridin-2-amine (3aa)**

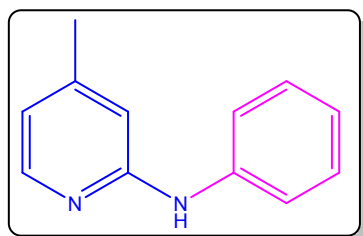

Yellow solid, m.p.: 106-107 °C; IR (KBr): 1614, 1592, 1568, 1558, 1488, 1471, 1441, 672  $\text{cm}^{-1}$ ;  $^1\text{H}$  NMR (400 MHz,  $\text{CDCl}_3$ )  $\delta$  8.06 (d,  $J = 4.8$  Hz,

1H), 7.41–7.29 (m, 4H), 7.04 (t,  $J = 6.4$  Hz, 1H), 6.71 (s, 1H), 6.63–6.39 (m, 2H), 2.26 (s, 3H) ppm;  $^{13}\text{C}$  NMR (100 MHz,  $\text{CDCl}_3$ )  $\delta$  156.1, 148.9, 148.1, 140.6, 129.2, 122.8, 120.3, 116.6, 108.4, 21.2 ppm; ESI-MS:  $m/z = 185$  ( $\text{M} + \text{H}$ ) $^+$ .

#### 4-Chloro-*N*-phenylpyridin-2-amine (**3ab**)

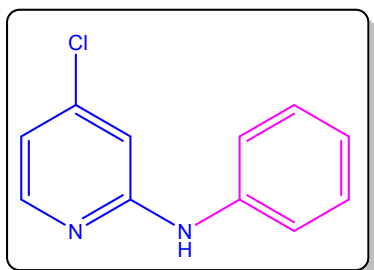

Yellow solid, m.p.: 102-103 °C; IR (KBr): 3335, 1578, 791, 760, 705  $\text{cm}^{-1}$ ;  $^1\text{H}$  NMR (400 MHz,  $\text{CDCl}_3$ )  $\delta$  8.07 (t,  $J = 5.6$  Hz, 1H), 7.53 (dd,  $J = 6.0, 3.6$  Hz, 1H), 7.39–7.29 (m, 4H), 7.12 (t,  $J = 7.2$  Hz, 1H), 6.87 (d,  $J = 1.2$  Hz, 1H), 6.71–6.69 (dd,  $J = 5.6, 1.6$  Hz 1H) ppm;  $^{13}\text{C}$  NMR (100 MHz,  $\text{CDCl}_3$ )  $\delta$  157.5, 149.2, 145.3, 139.7, 129.5, 123.8, 121.5, 115.3, 107.5 ppm; ESI-MS:  $m/z = 205$  ( $\text{M} + \text{H}$ ) $^+$ .

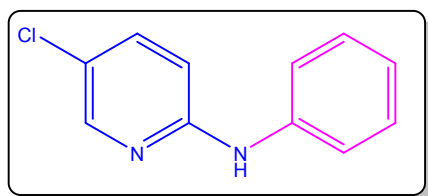

#### 5-Chloro-*N*-phenylpyridin-2-amine (**3ac**)

Pale yellow solid, m.p.: 100-101 °C; IR (KBr): 3325, 1603, 1588, 1574, 755, 707, 680  $\text{cm}^{-1}$ ;  $^1\text{H}$  NMR (400 MHz,  $\text{CDCl}_3$ )  $\delta$  8.14 (d,  $J = 2.4$  Hz, 1H), 7.43 (dd,  $J = 8.8, 2.4$  Hz, 1H), 7.38–7.28 (m, 4H), 7.09 (d,  $J = 6.8$  Hz, 1H), 7.05 (d,  $J = 9.2$  Hz, 1H), 6.82 (d,  $J = 8.8$  Hz, 1H) ppm;  $^{13}\text{C}$  NMR (100 MHz,  $\text{CDCl}_3$ )  $\delta$  154.6, 146.6, 140.1, 137.4, 129.3, 123.1, 121.6, 120.4, 109.1 ppm; ESI-MS:  $m/z = 205$  ( $\text{M} + \text{H}$ ) $^+$ .

#### 3,5-Dichloro-*N*-phenylpyridin-2-amine (**3ad**)

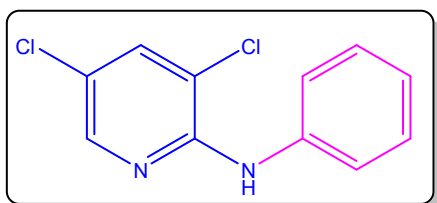

Semi-solid ; IR (KBr): 3462, 1599, 1578, 1560, 746, 690  $\text{cm}^{-1}$ ;  $^1\text{H}$  NMR (400 MHz,  $\text{CDCl}_3$ )  $\delta$  8.09 (d,  $J = 2.4$  Hz, 1H), 7.60 (dd,  $J = 5.6, 1.2$  Hz, 3H), 7.36 (m, 2H), 7.09 (m, 1H), 6.95 (s, 1H) ppm;  $^{13}\text{C}$  NMR (100 MHz,  $\text{CDCl}_3$ )  $\delta$  149.7, 144.2, 139.2, 136.3, 131.0, 129.1, 123.2, 120.0, 116.1 ppm; ESI-MS:  $m/z = 240$  ( $\text{M} + \text{H}$ ) $^+$ .

#### 3-Bromo-5-methyl-*N*-phenylpyridin-2-amine (**3ae**)

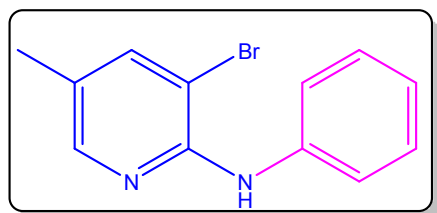

Dark green solid, m.p.: 85-86 °C; IR (KBr): 3410, 1510, 1498, 1454, 623  $\text{cm}^{-1}$ ;  $^1\text{H}$  NMR (400 MHz,  $\text{CDCl}_3$ )  $\delta$  8.07 (d,  $J = 2.0$  Hz, 1H), 7.53 (d,  $J = 8.0$  Hz, 2H), 7.43–7.28 (m, 3H), 7.04 (t,  $J = 7.6$  Hz, 1H), 6.13 (s, 1H), 2.20 (s, 3H) ppm;  $^{13}\text{C}$  NMR (100 MHz,  $\text{CDCl}_3$ )  $\delta$  152.3, 143.4, 140.3, 137.2, 128.9, 128.8, 122.5, 121.8, 119.6, 17.1 ppm; ESI-MS:  $m/z = 264$  ( $\text{M} + \text{H}$ ) $^+$ .



#### 4-Bromo-5-methyl-*N*-phenylpyridin-2-amine (**3af**)

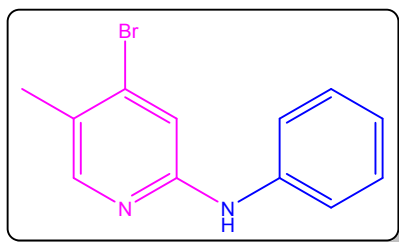

Yellow solid, m.p.: 113-114 °C; IR (KBr): 3447, 2926, 1590, 1567, 1464, 1437, 1235, 1189, 1173, 840, 767 cm<sup>-1</sup>; <sup>1</sup>H NMR (400 MHz, CDCl<sub>3</sub>) δ 8.20 (s, 1H), 7.37–7.28 (m, 4H), 7.07 (t, *J* = 7.2 Hz, 1H), 6.76 (s, 1H), 6.64 (s, 1H), 2.30 (s, 3H) ppm; <sup>13</sup>C NMR (100 MHz, CDCl<sub>3</sub>) δ 155.2, 149.4, 148.2, 140.1, 129.2, 122.9, 120.4, 112.5,

109.9, 22.7 ppm; ESI-MS: *m/z* = 264 (M + H)<sup>+</sup>.

#### 5-Bromo-6-methyl-*N*-phenylpyridin-2-amine (**3ag**)

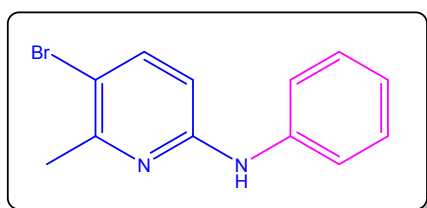

Dark brown liquid, IR (KBr): 3404, 2925, 1575, 1436, 1392, 1141, 742, 694 cm<sup>-1</sup>; <sup>1</sup>H NMR (400 MHz, CDCl<sub>3</sub>) δ 7.52 (dd, *J* = 8.8, 4.0 Hz, 1H), 7.35–7.26 (m, 4H), 7.07–7.02 (m, 1H), 6.71 (s, 1H), 6.59 (d, *J* = 8.4 Hz, 1H), 2.52 (s, 3H) ppm; <sup>13</sup>C NMR (100 MHz, CDCl<sub>3</sub>)

δ 155.5, 154.3, 141.3, 140.2, 129.4, 123.2, 120.4, 109.7, 107.0, 24.6 ppm; ESI-MS: *m/z* = 264 (M + H)<sup>+</sup>.

#### 5-Nitro-*N*-phenylpyridin-2-amine (**3ah**)

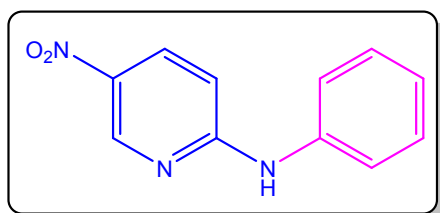

Yellow solid, m.p.: 108-109 °C; IR (KBr): 3436, 1607, 1581, 1332, 1287, 1231, 1119, 827, 754, 702 cm<sup>-1</sup>; <sup>1</sup>H NMR (400 MHz, CDCl<sub>3</sub>) δ 9.09 (d, *J* = 2.4 Hz, 1H), 8.25 (dd, *J* = 9.2, 2.8 Hz, 1H), 7.47–7.33 (m, 5H), 7.23 (d, *J* = 7.2 Hz, 1H), 6.79 (d, *J* = 9.2 Hz,

1H) ppm; <sup>13</sup>C NMR (100 MHz, CDCl<sub>3</sub>) δ 159.8, 146.8, 133.6, 129.9, 125.8, 122.8, 106.5 ppm; ESI-MS: *m/z* = 216 (M + H)<sup>+</sup>.

#### 3-Nitro-*N*-phenylaniline (**5a**)

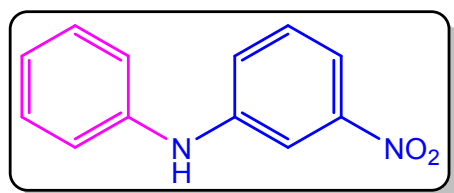

Yellow solid, m.p.: 87-88 °C; IR (KBr): 3379, 1599, 1337, 1279, 1093, 1076, 866, 829, 754, 697, 676, 665 cm<sup>-1</sup>; <sup>1</sup>H NMR (400 MHz, CDCl<sub>3</sub>) δ 7.83 (d, *J* = 1.6 Hz, 1H), 7.68 (d, *J* = 8.0 Hz, 1H), 7.40–7.24 (m, 4H), 7.13 (d, *J* = 7.2 Hz, 2H), 7.07 (t, *J* = 6.8

Hz, 1H), 5.96 (s, 1H) ppm; <sup>13</sup>C NMR (100 MHz, CDCl<sub>3</sub>) δ 145.2, 141.1, 130.2, 129.9, 123.4, 122.0, 120.0, 114.9, 110.4 ppm; ESI-MS: *m/z* = 215 (M + H)<sup>+</sup>.

#### 4-Nitro-*N*-phenylaniline (**5b**)

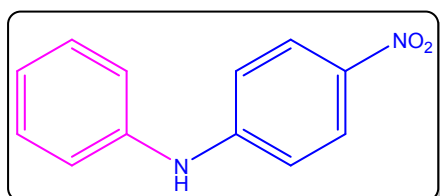

Yellow solid, m.p.: 132-133 °C; IR (KBr): 3343, 1604, 1585, 1303, 1186, 1112, 879, 842, 748, 691, 670 cm<sup>-1</sup>; <sup>1</sup>H NMR (400

MHz, CDCl<sub>3</sub>) δ 8.11 (d, *J* = 9.2 Hz, 2H), 7.39 (t, *J* = 7.6 Hz, 2H), 7.23–7.11 (m, 3H), 6.94 (d, *J* = 8.8 Hz, 2H), 6.38 (s, 1H) ppm; <sup>13</sup>C NMR (100 MHz, CDCl<sub>3</sub>) δ 150.2, 139.6, 139.4, 129.7, 126.2, 124.6, 121.9, 113.6 ppm; ESI-MS: *m/z* = 215 (M + H).

<sup>1</sup>H NMR and <sup>13</sup>C NMR of compound **3a**

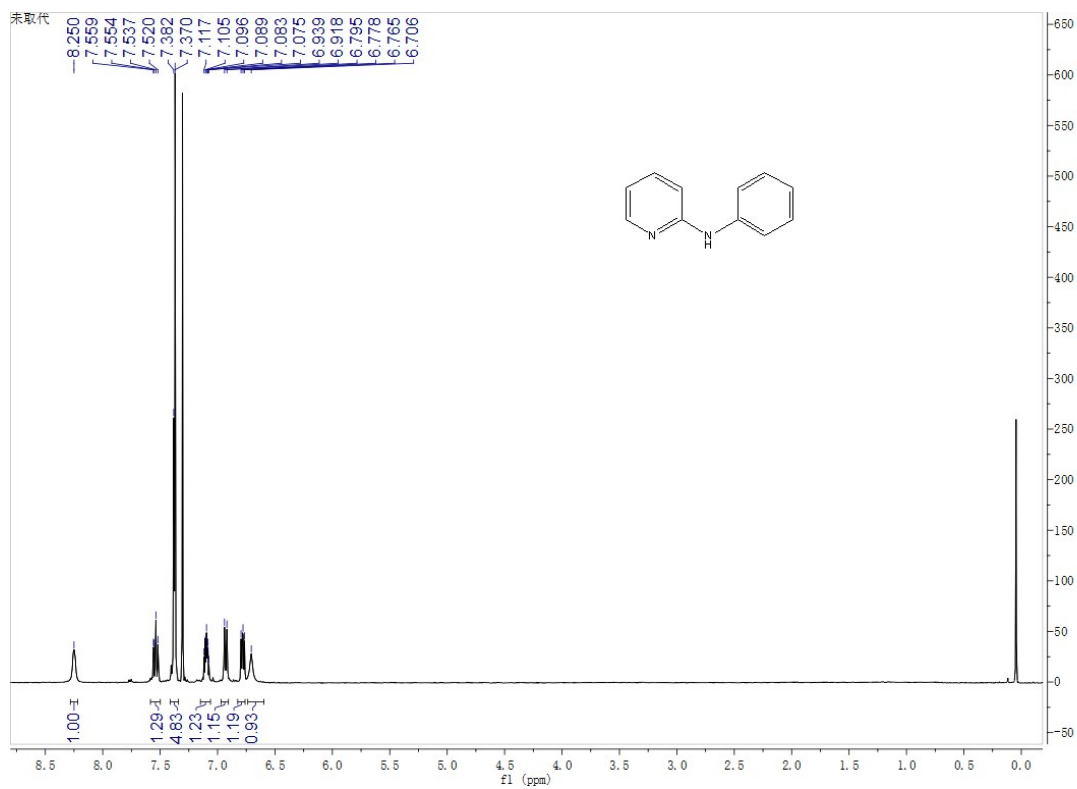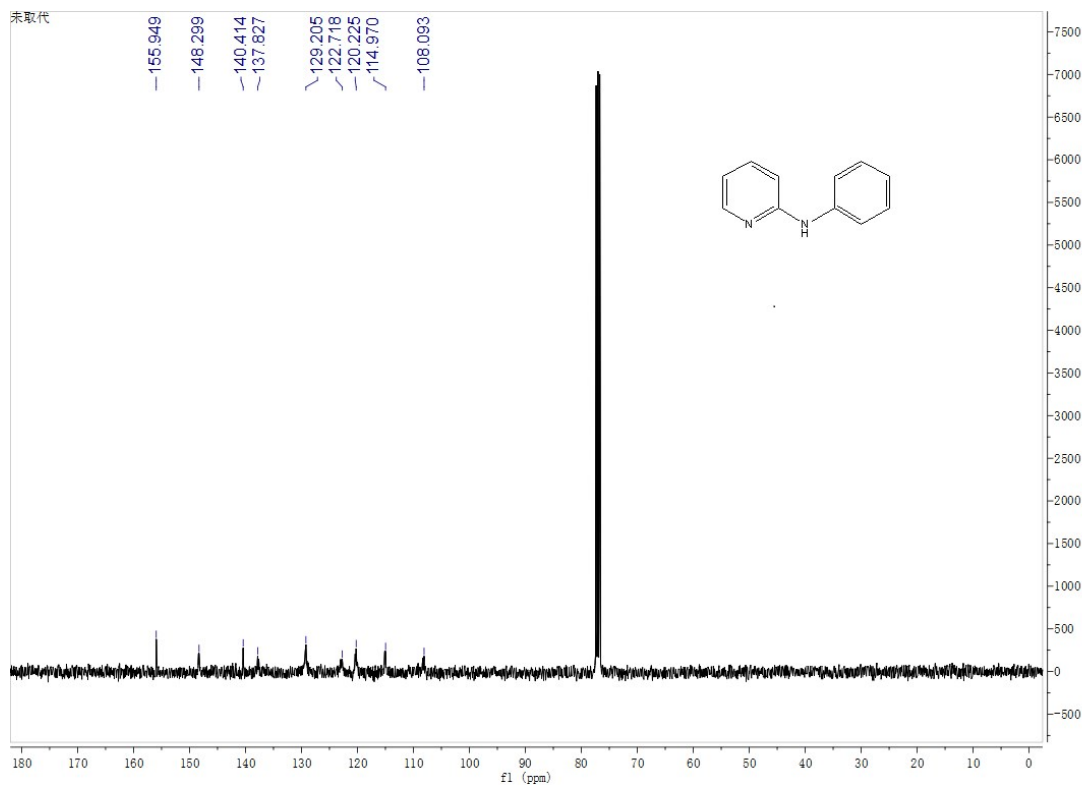

$^1\text{H}$  NMR and  $^{13}\text{C}$  NMR of compound **3b**

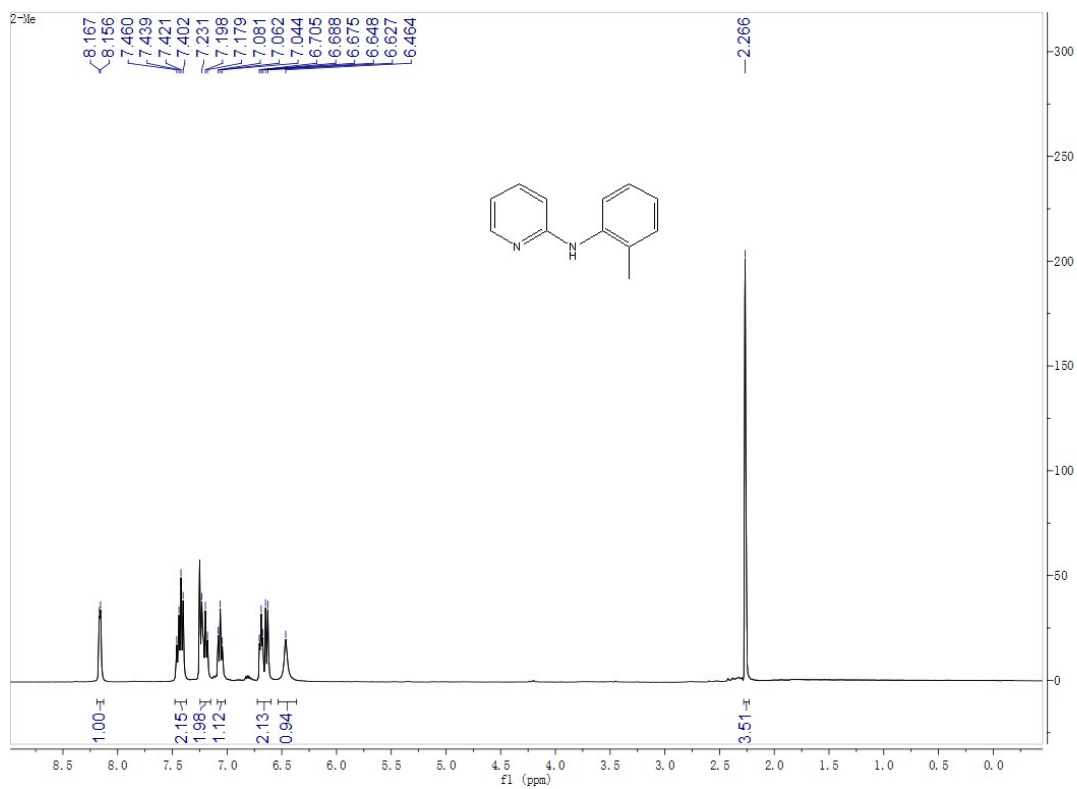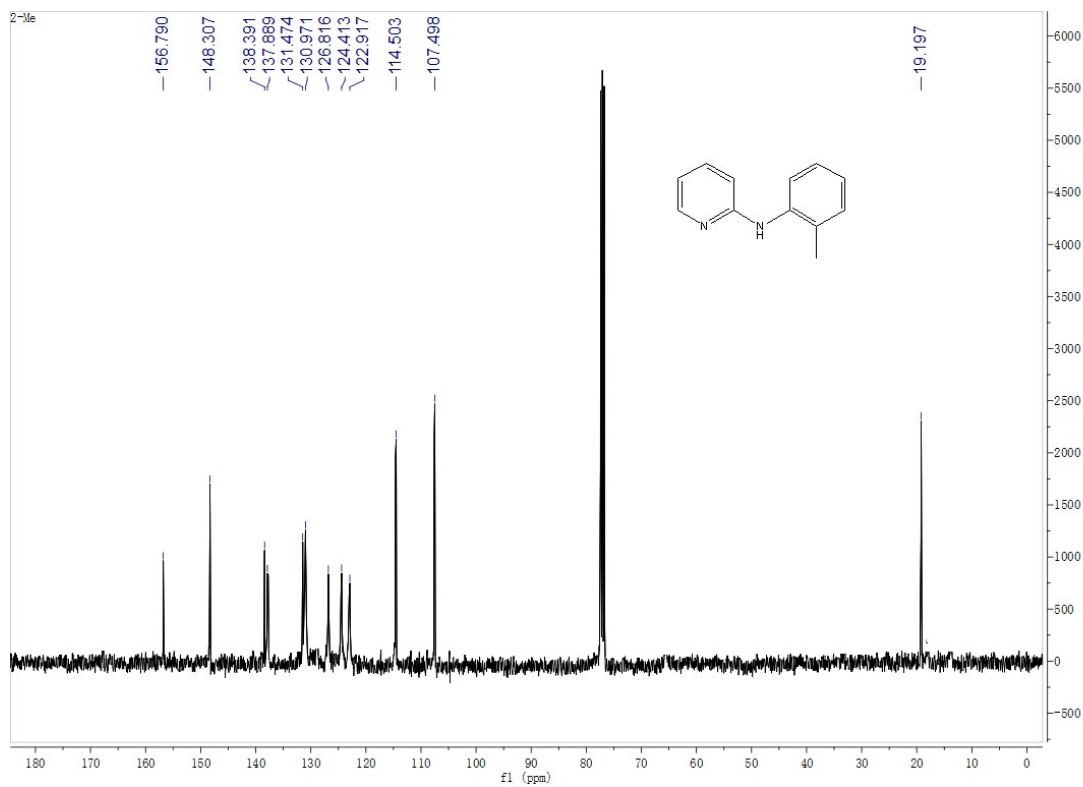

<sup>1</sup>H NMR and <sup>13</sup>C NMR of compound **3c**

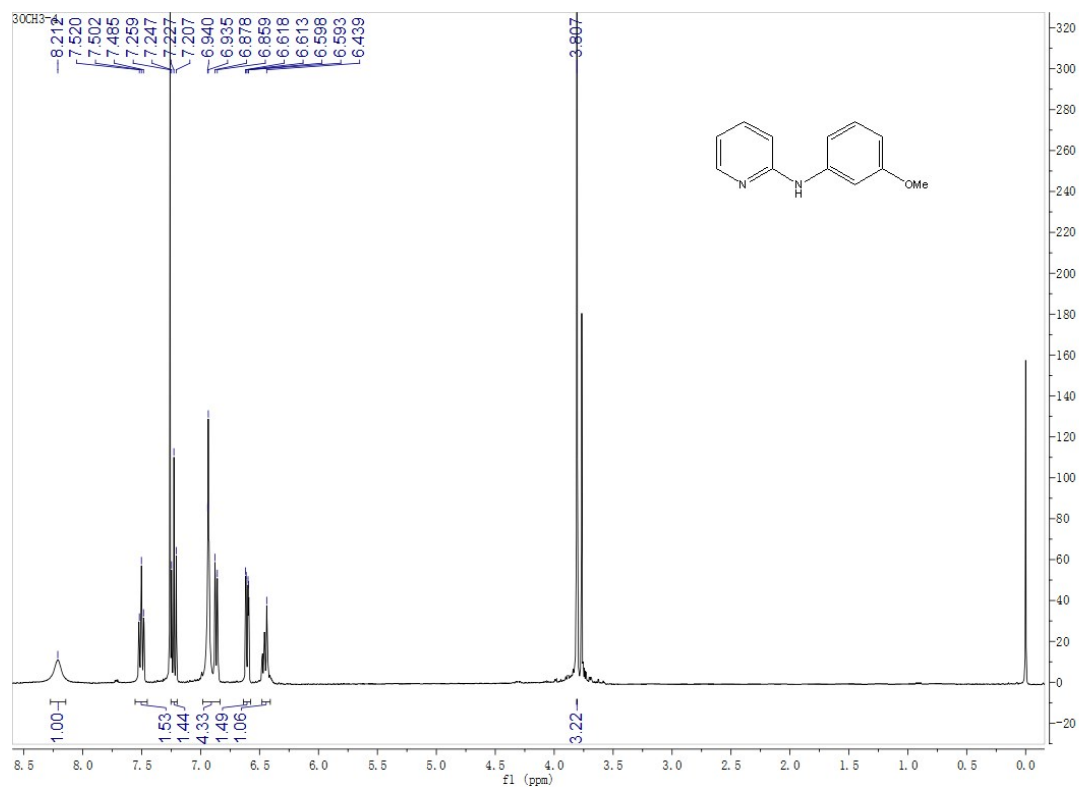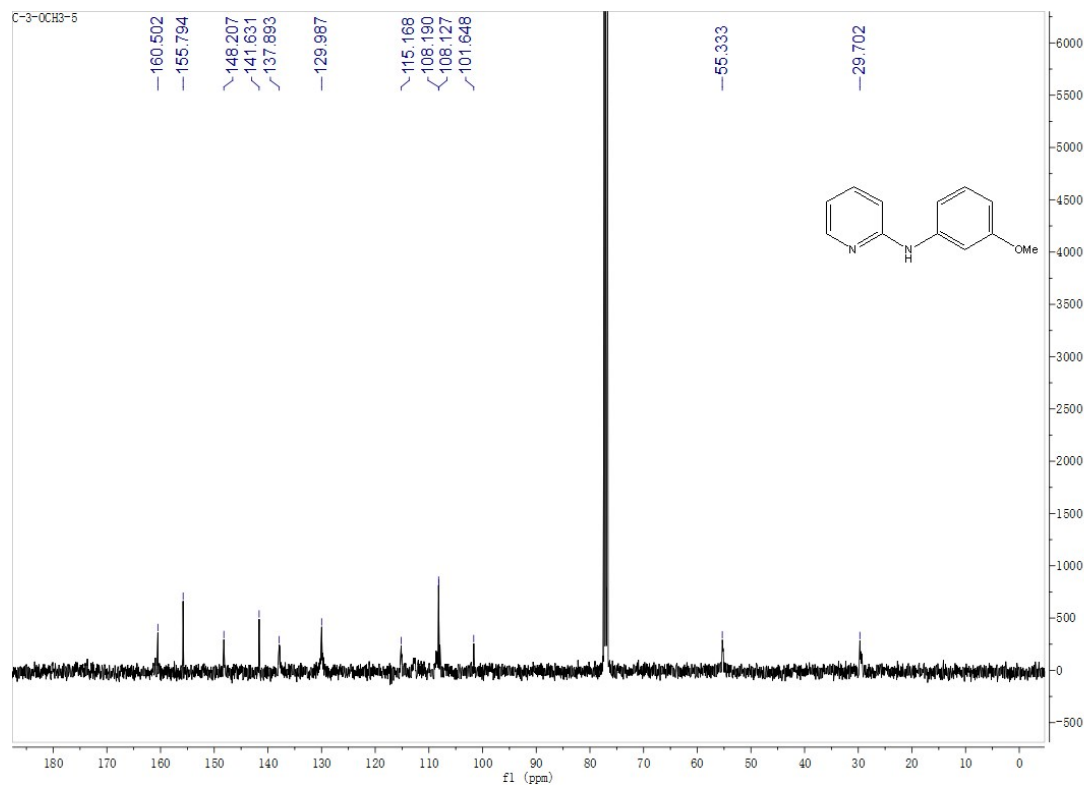

<sup>1</sup>H NMR and <sup>13</sup>C NMR of compound **3d**

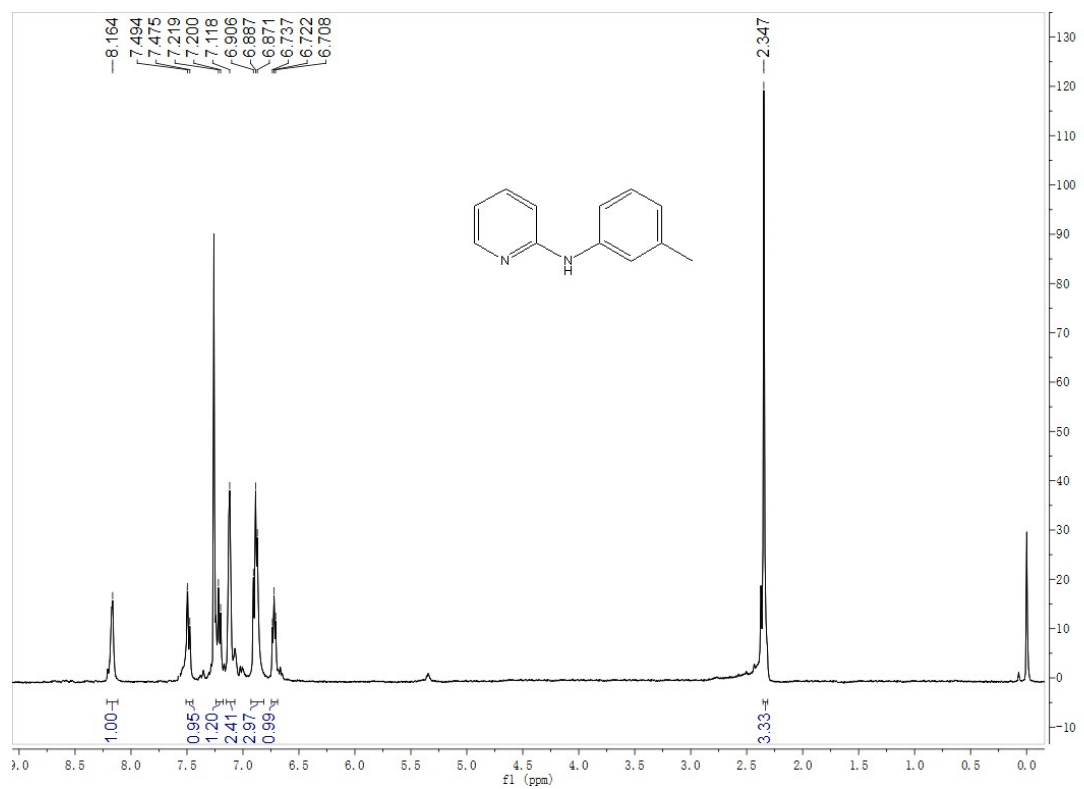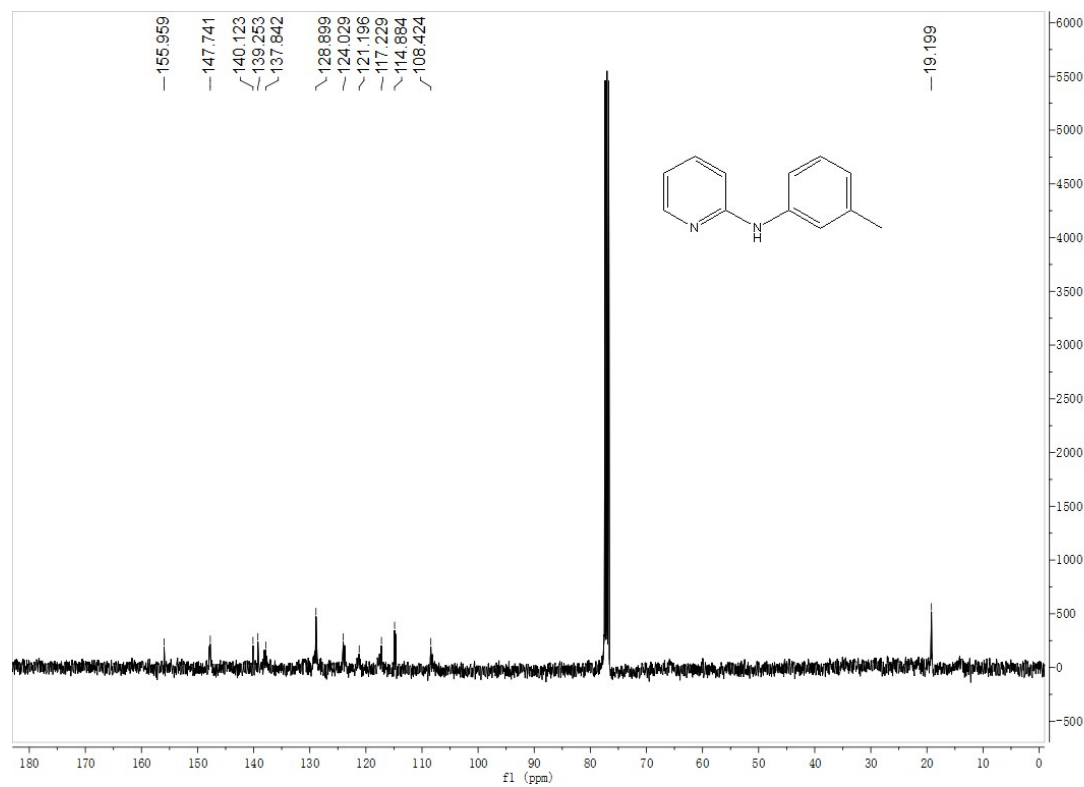

<sup>1</sup>H NMR and <sup>13</sup>C NMR of compound **3e**

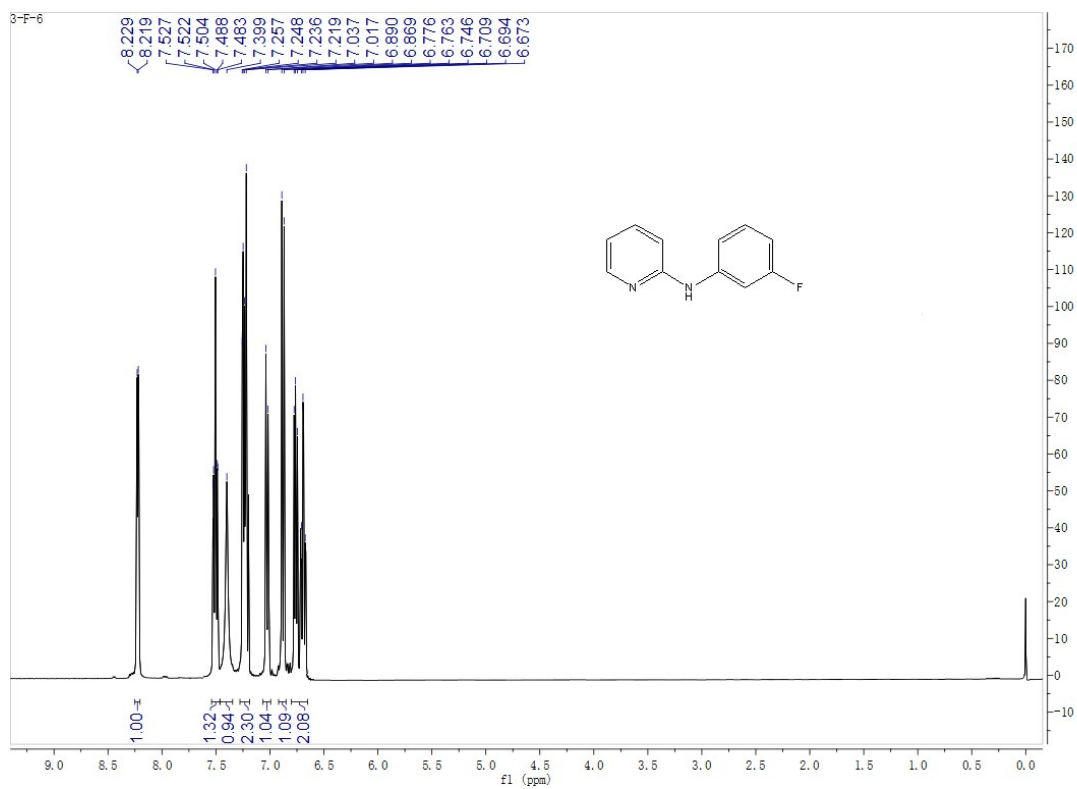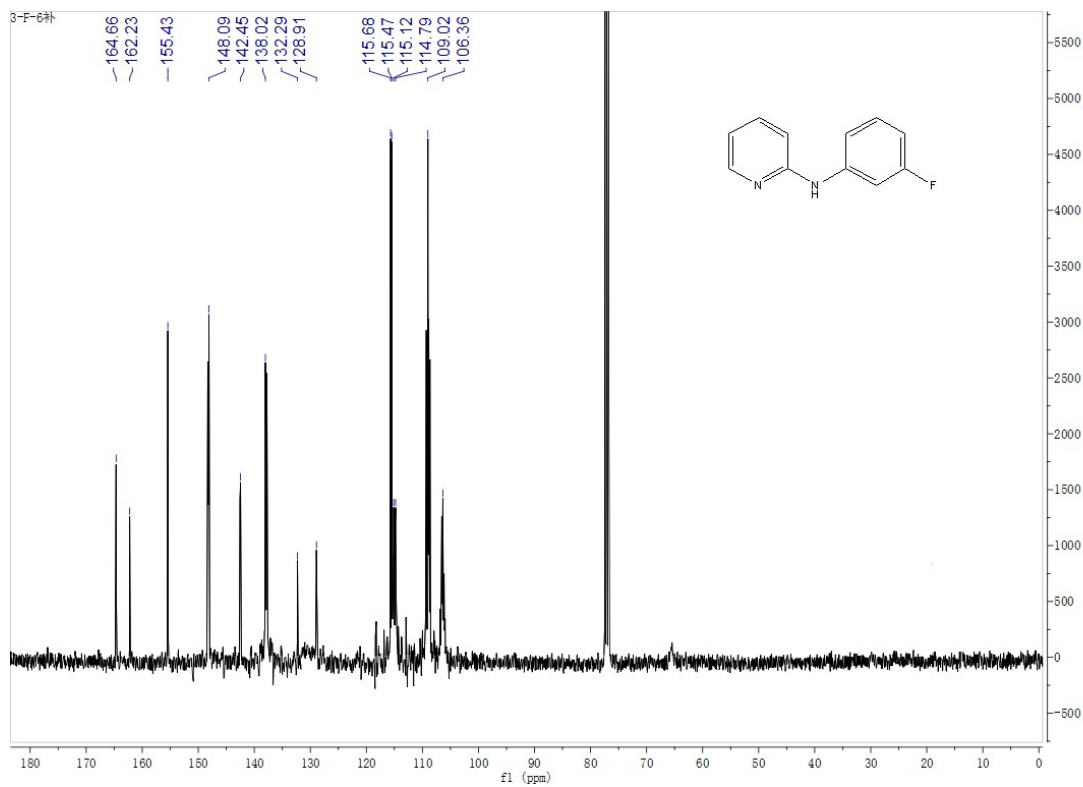

$^1\text{H}$  NMR and  $^{13}\text{C}$  NMR of compound **3f**

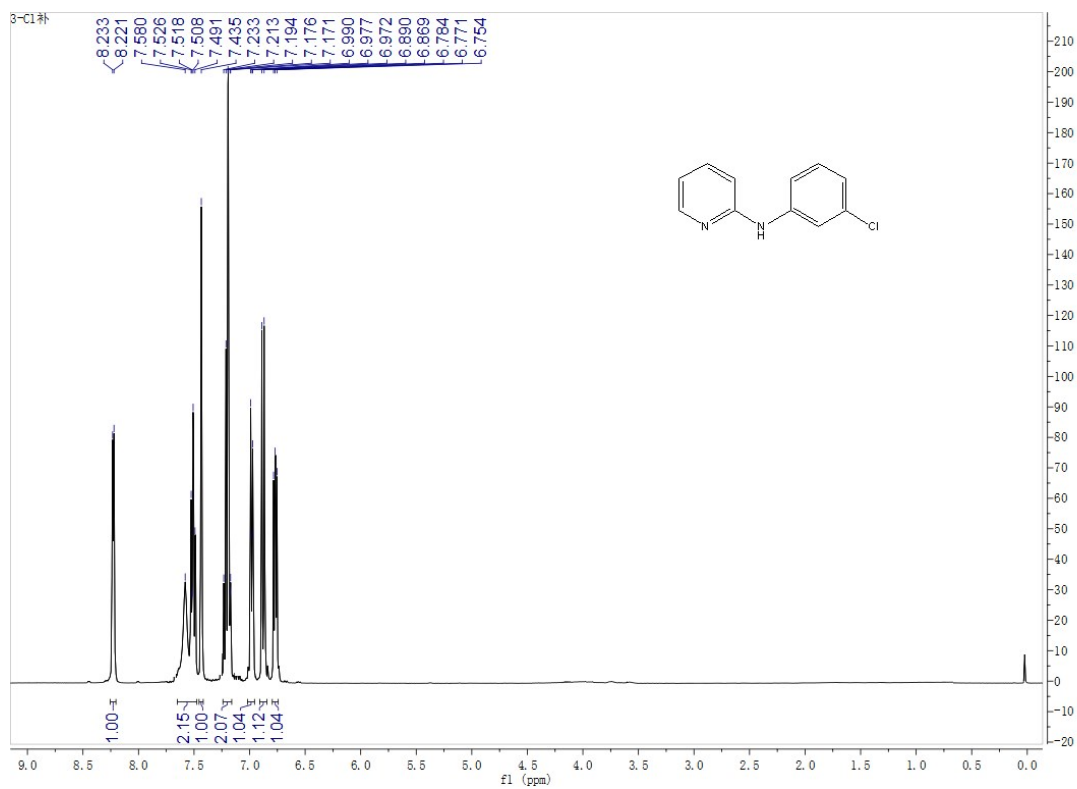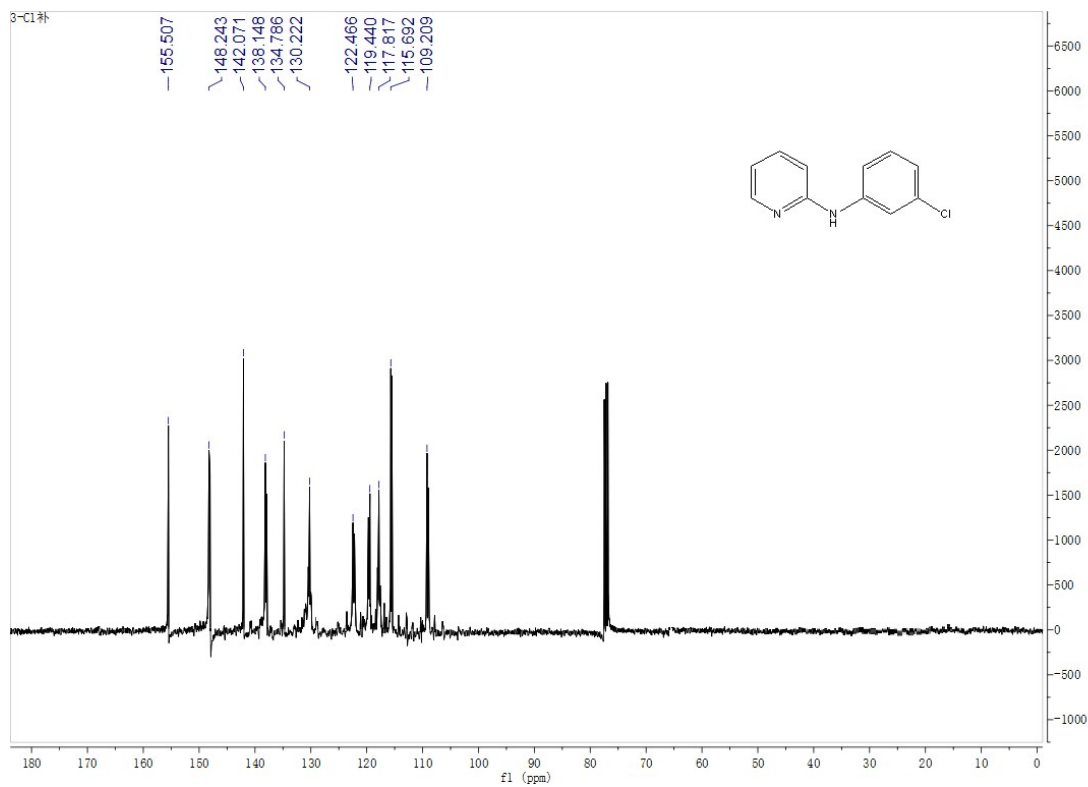

$^1\text{H}$  NMR and  $^{13}\text{C}$  NMR of compound **3g**



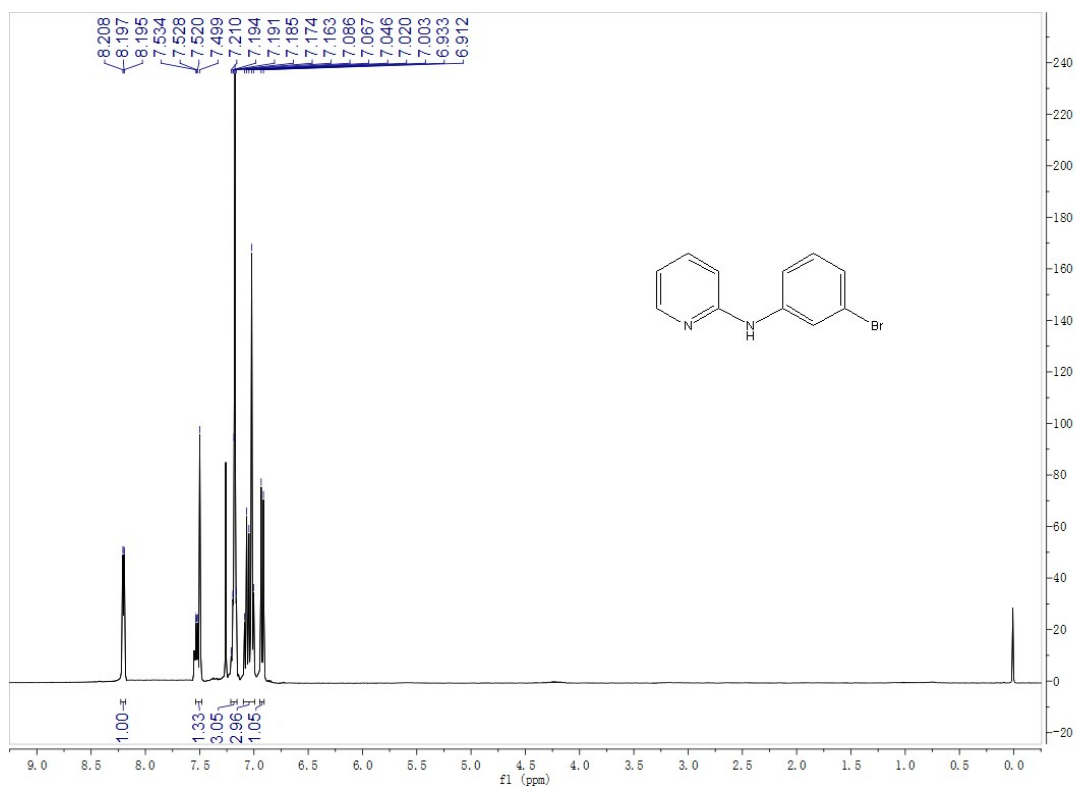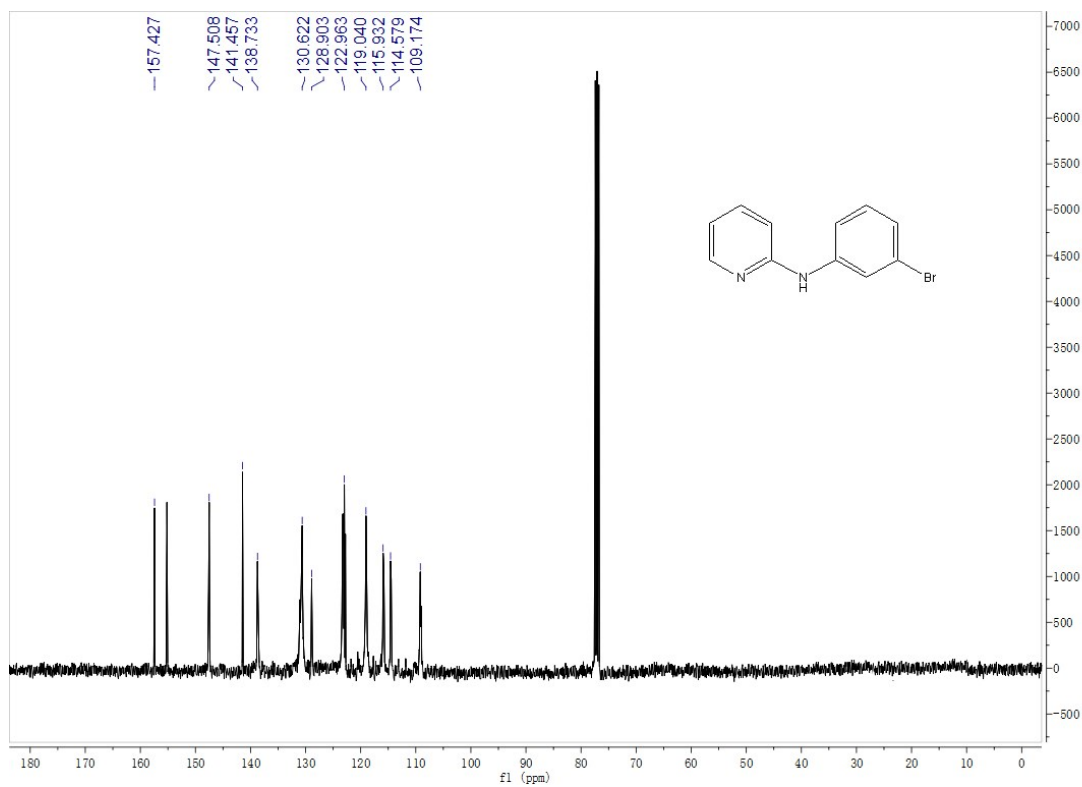

<sup>1</sup>H NMR and <sup>13</sup>C NMR of compound **3h**

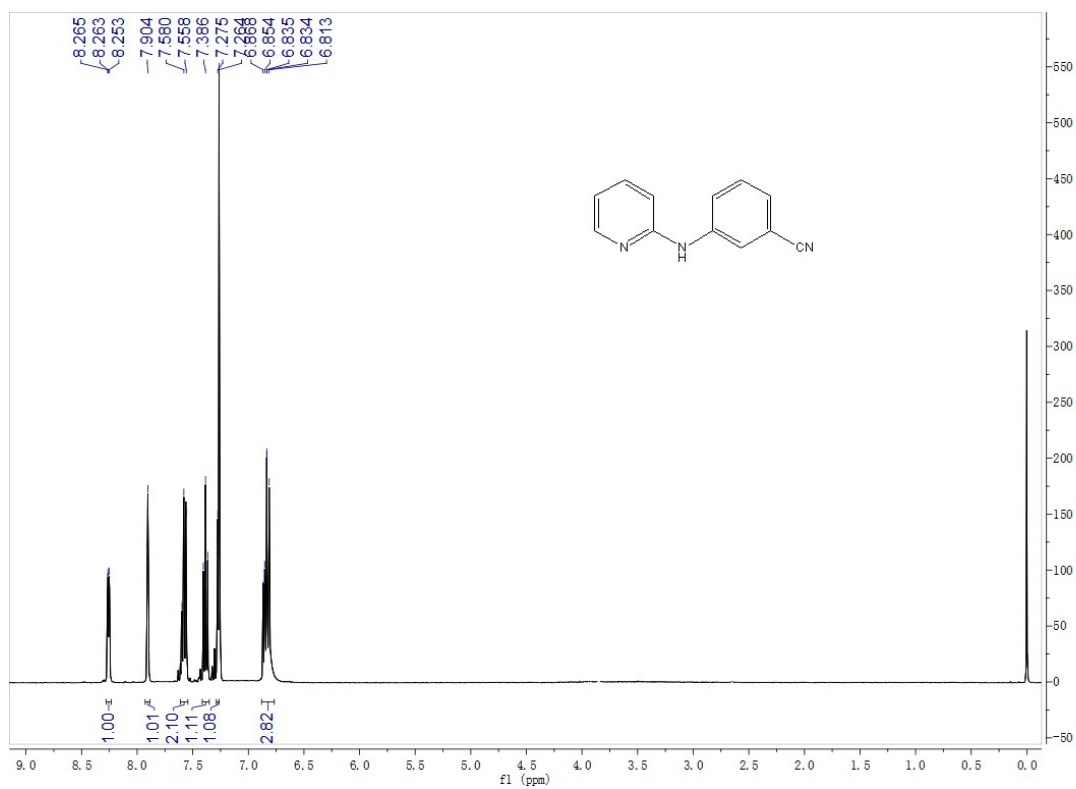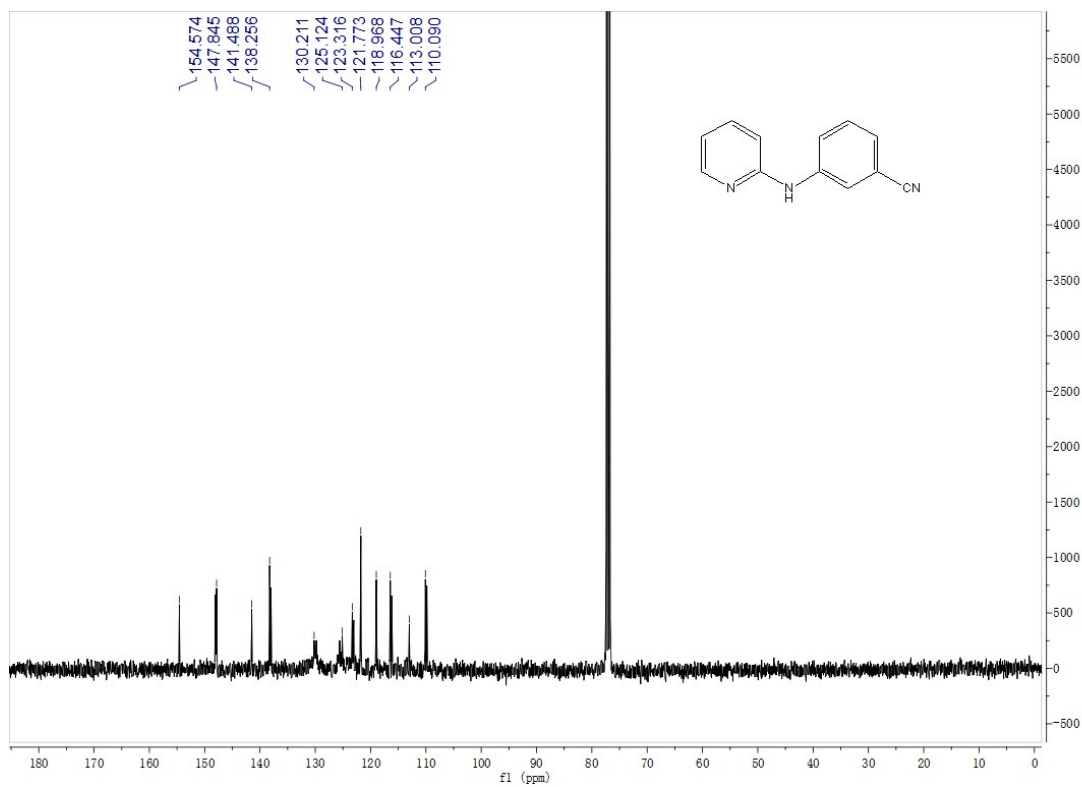

$^1\text{H}$  NMR and  $^{13}\text{C}$  NMR of compound **3i**

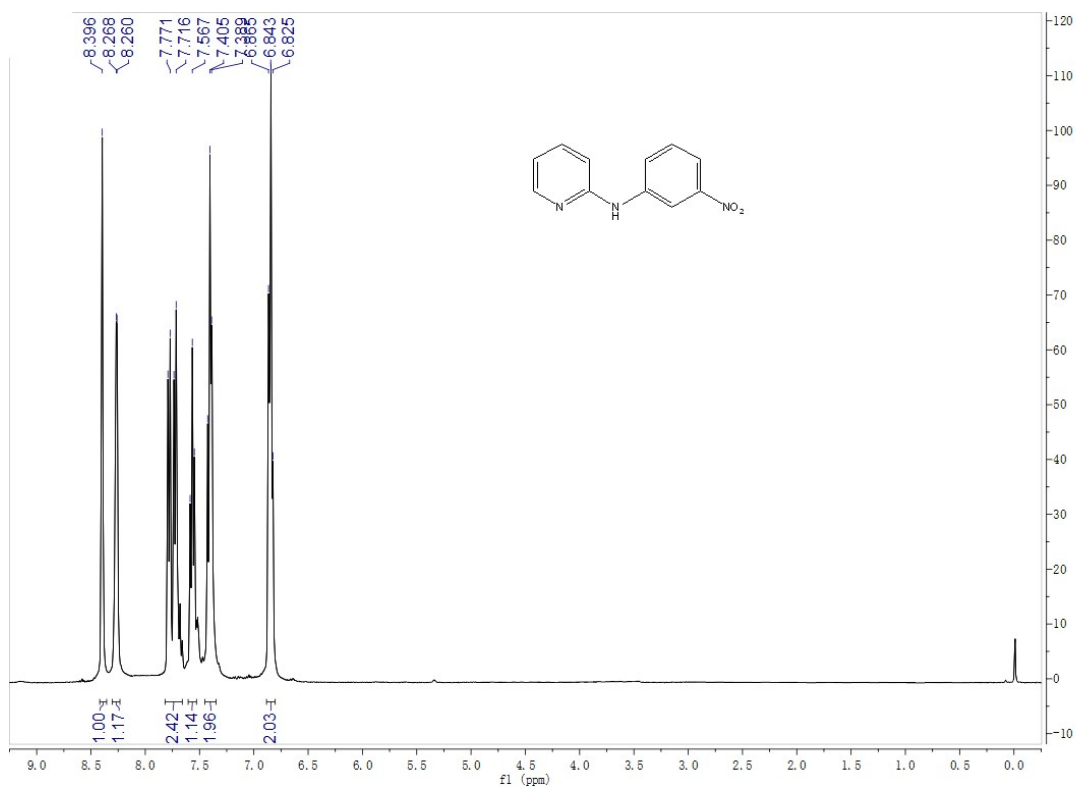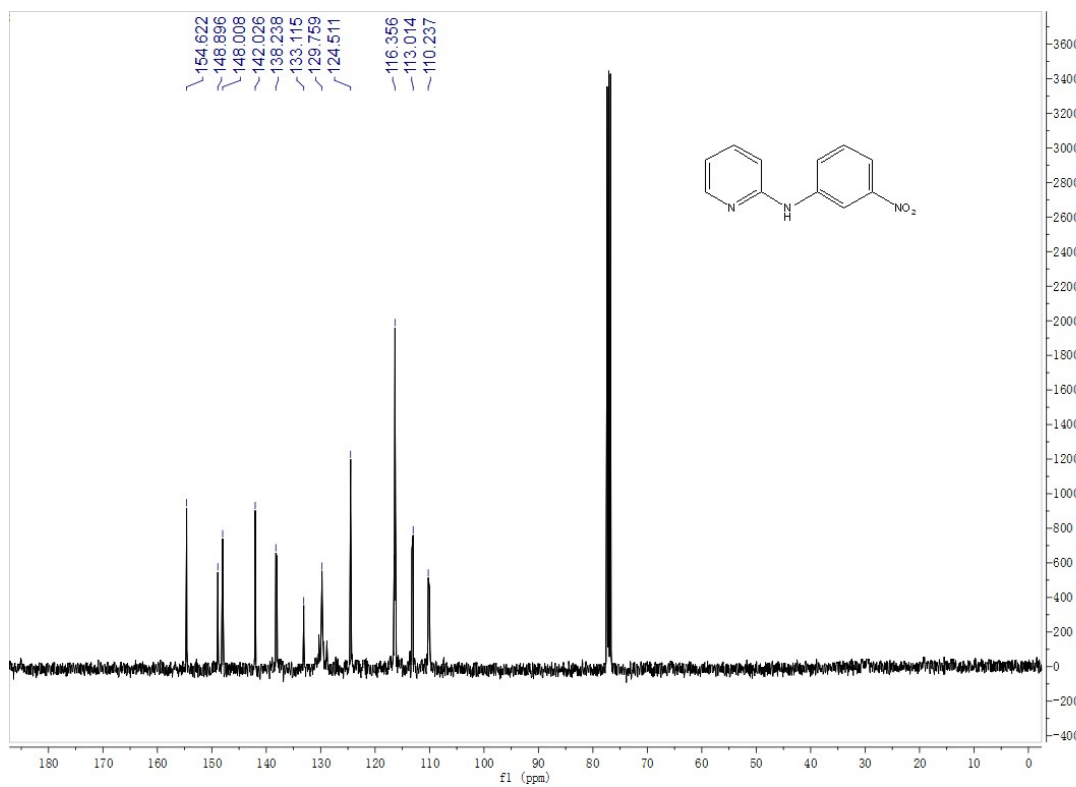

<sup>1</sup>H NMR and <sup>13</sup>C NMR of compound **3j**

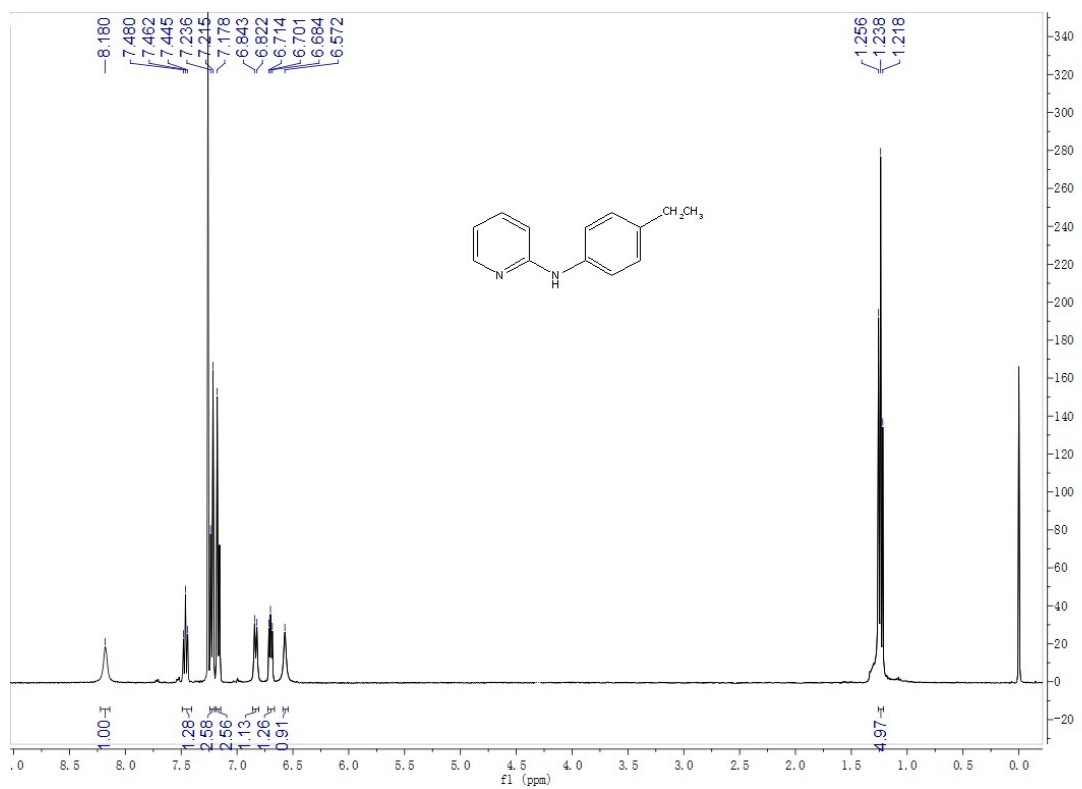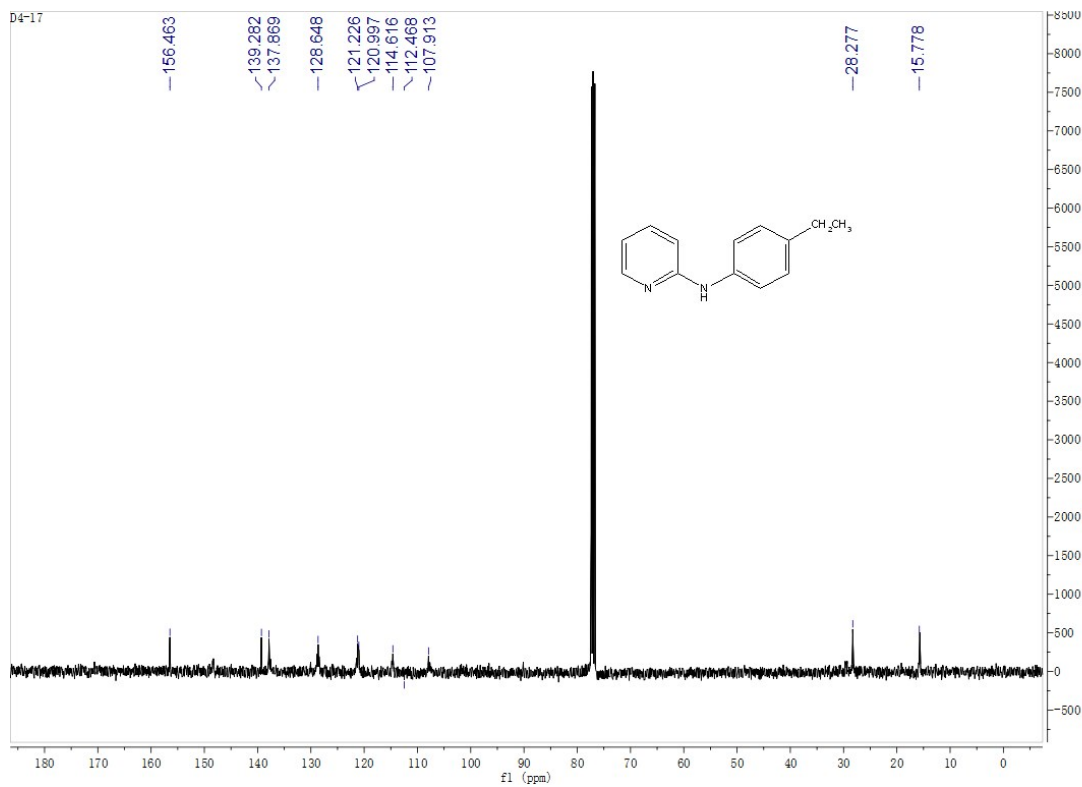

<sup>1</sup>H NMR and <sup>13</sup>C NMR of compound **3k**

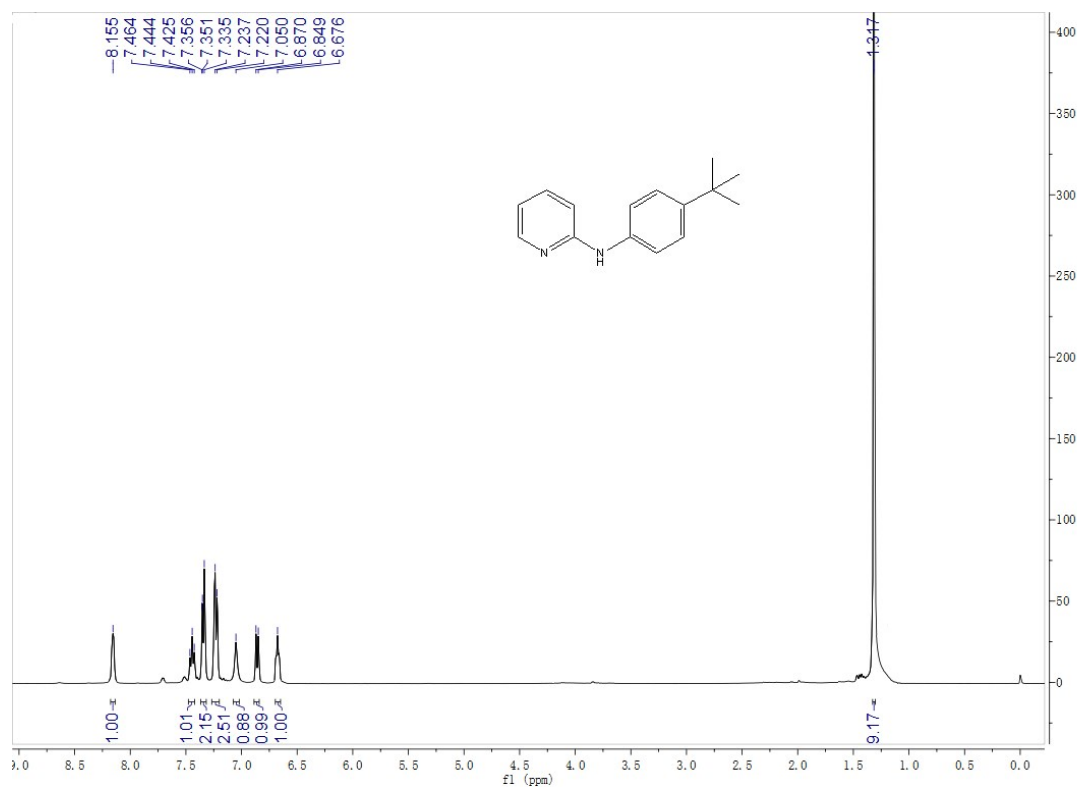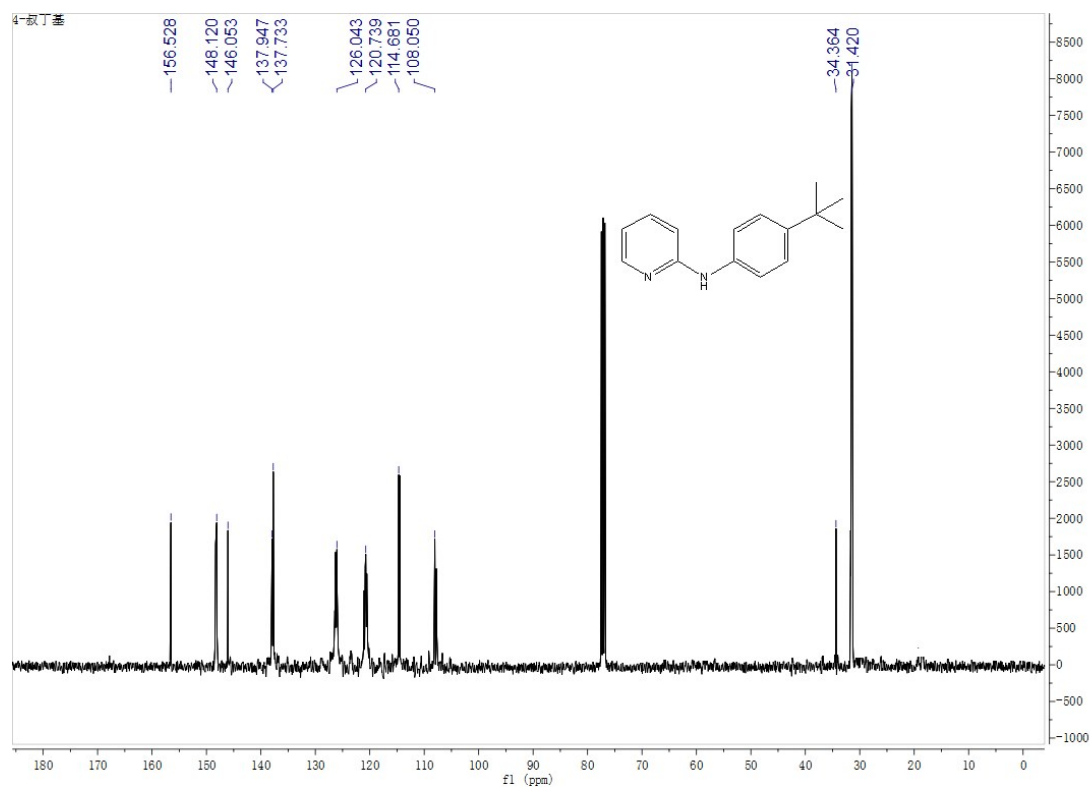

<sup>1</sup>H NMR and <sup>13</sup>C NMR of compound 31

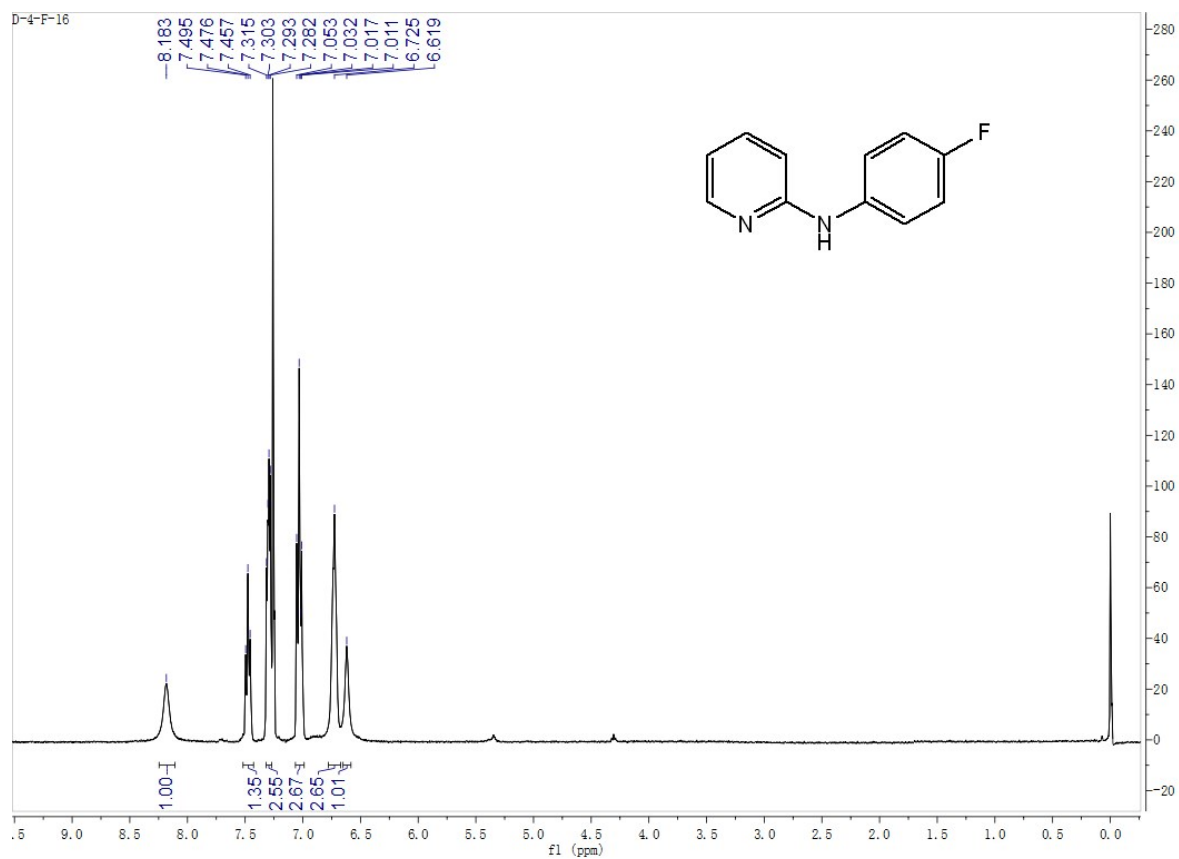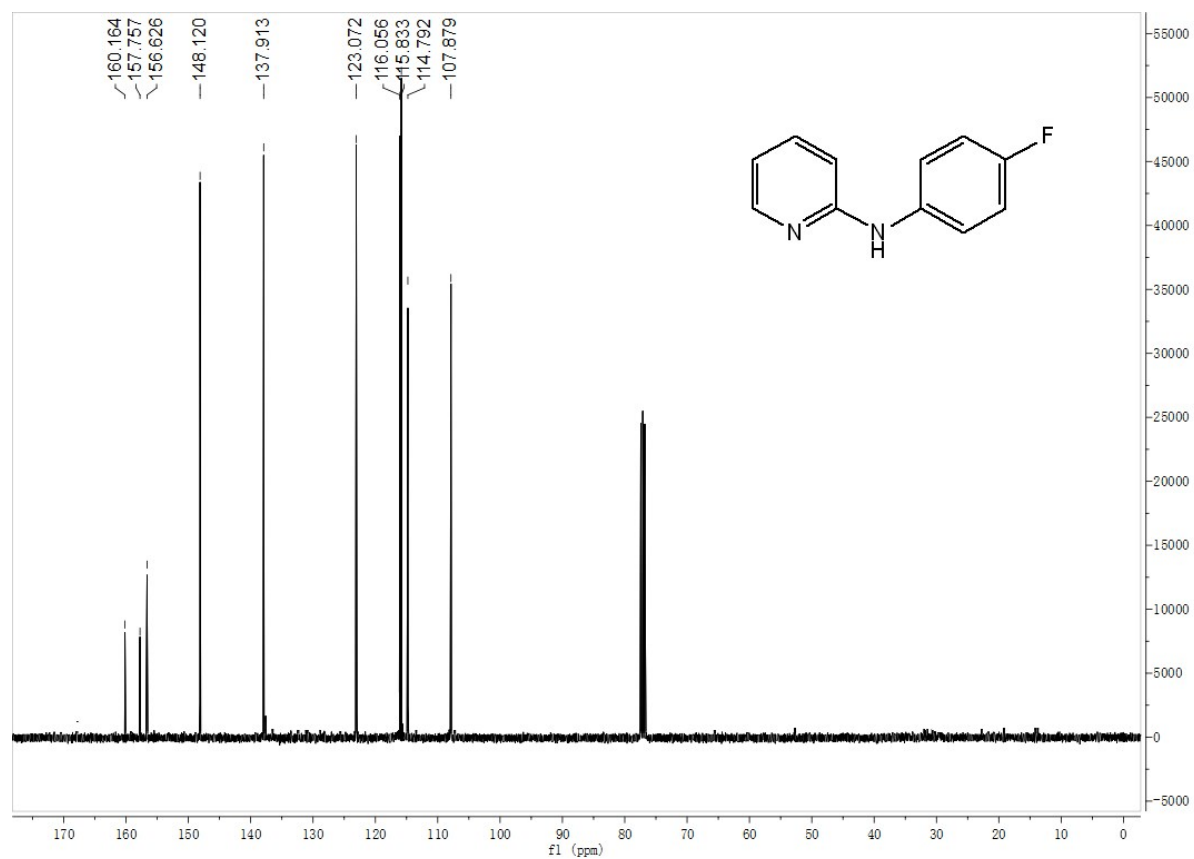

$^1\text{H}$  NMR and  $^{13}\text{C}$  NMR of compound **3m**

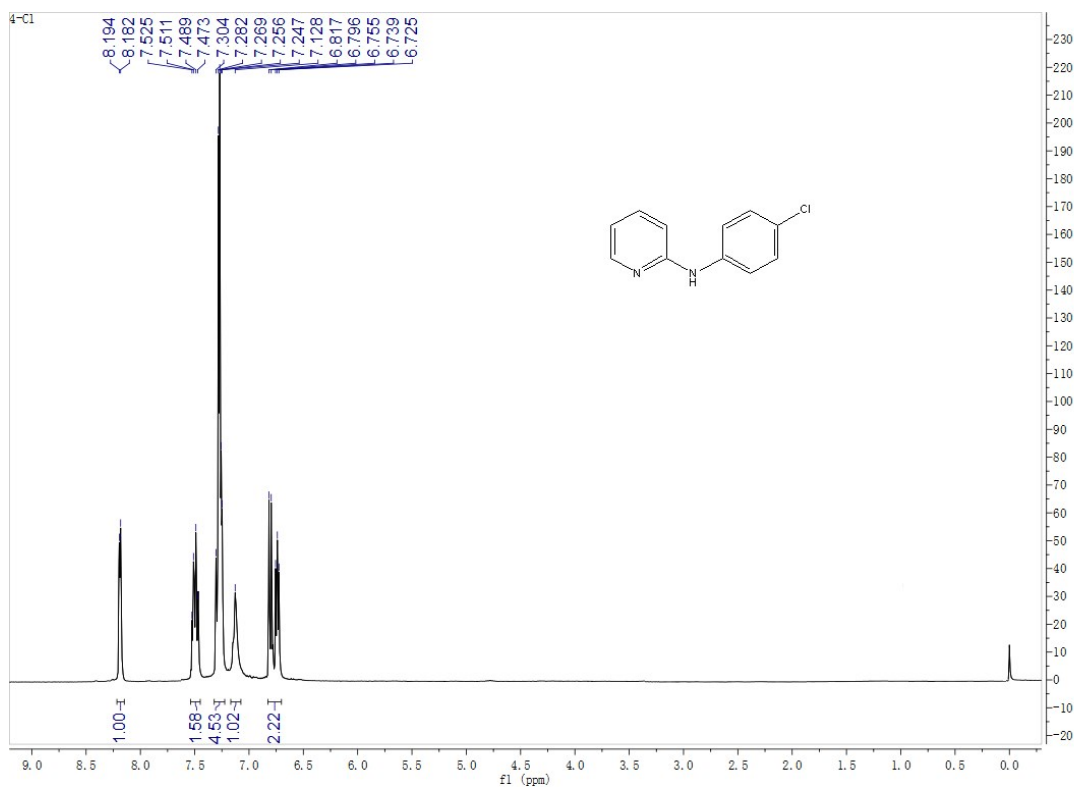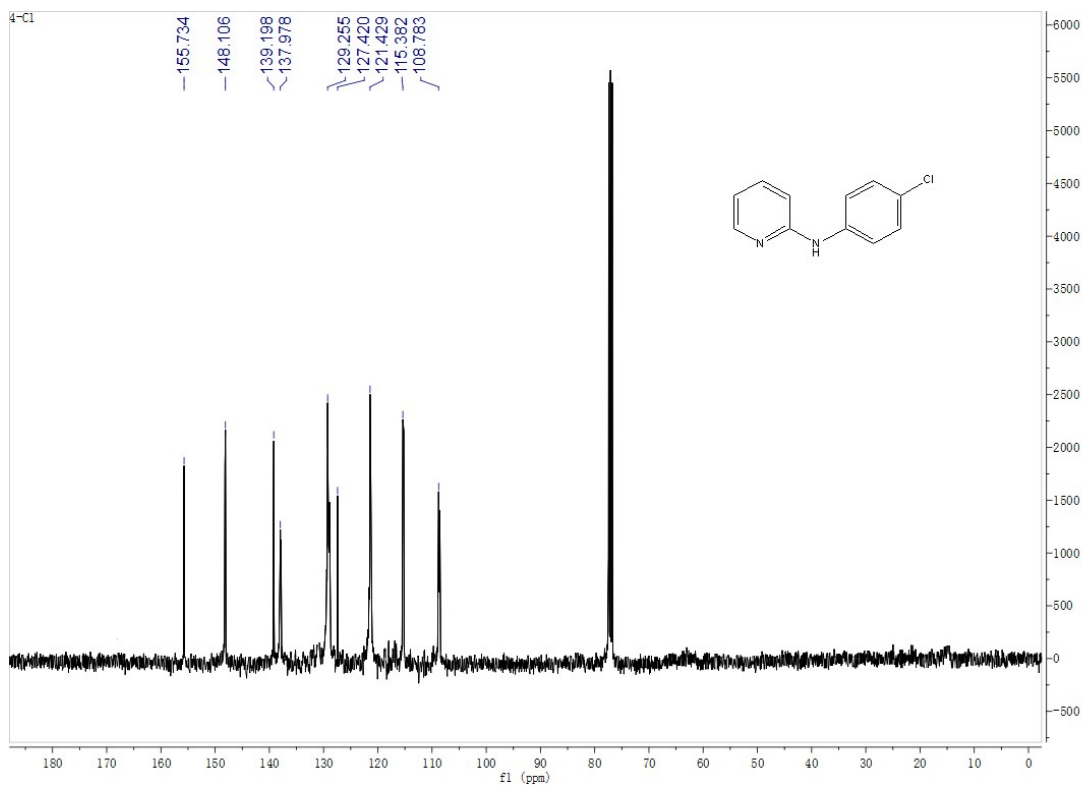

$^1\text{H}$  NMR and  $^{13}\text{C}$  NMR of compound **3n**

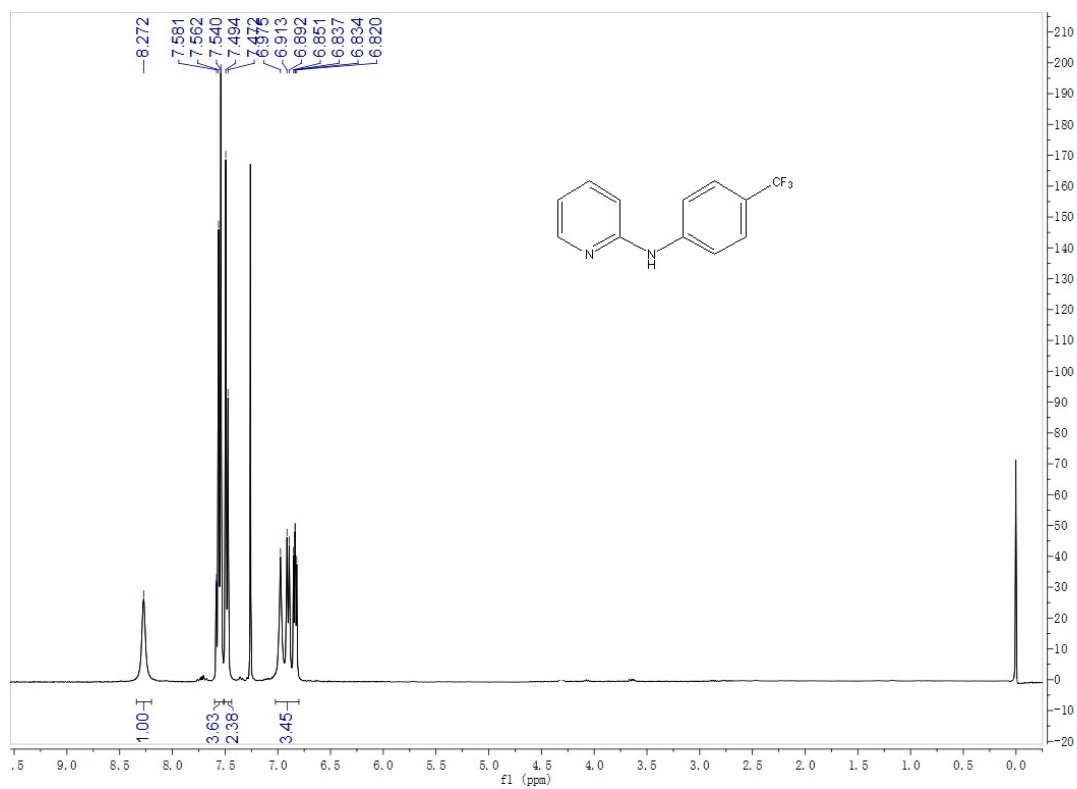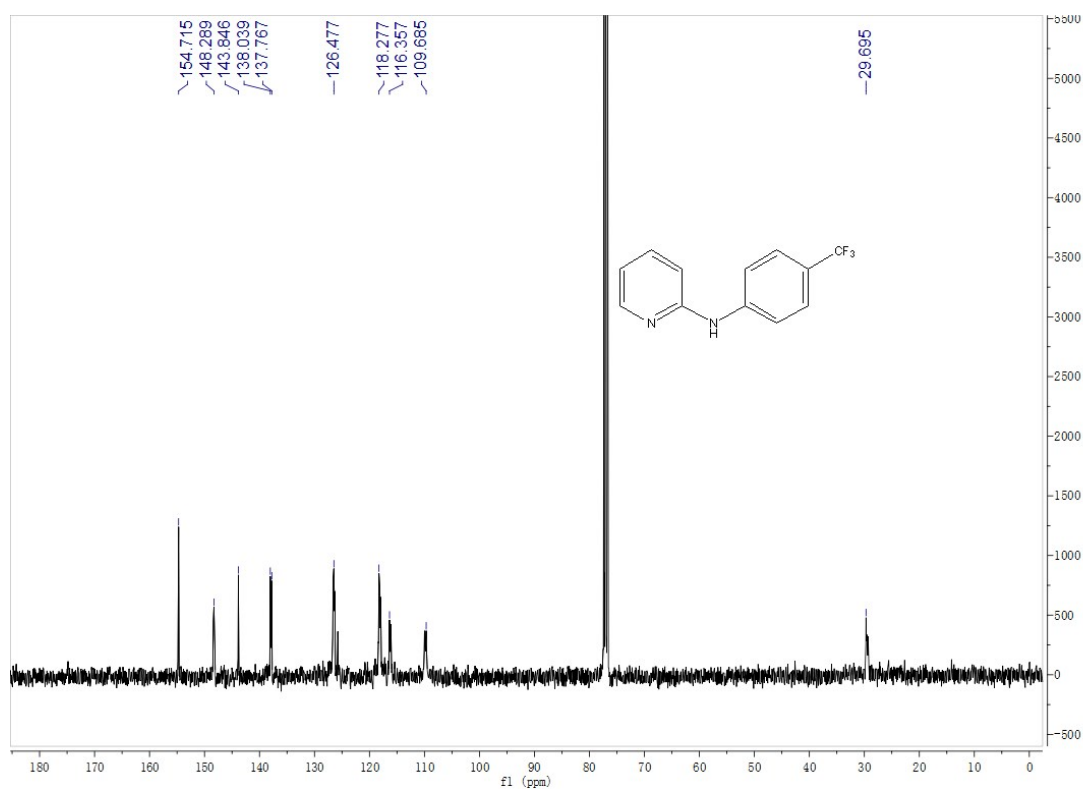

<sup>1</sup>H NMR and <sup>13</sup>C NMR of compound **3o**



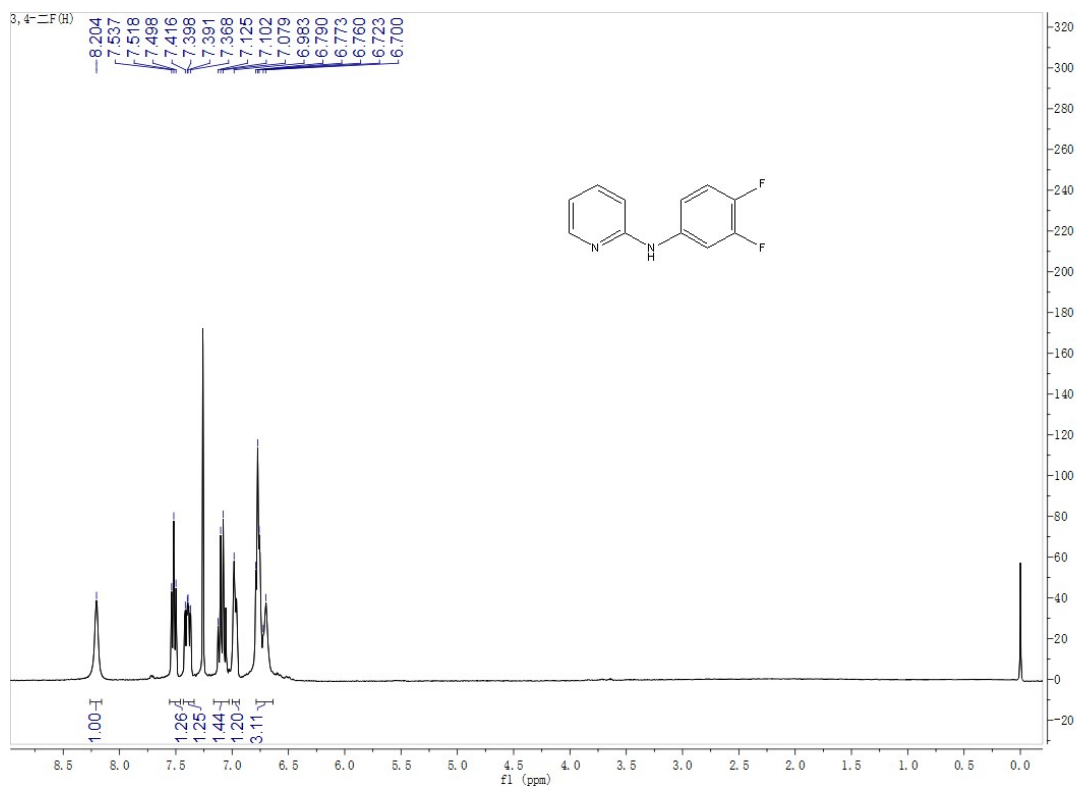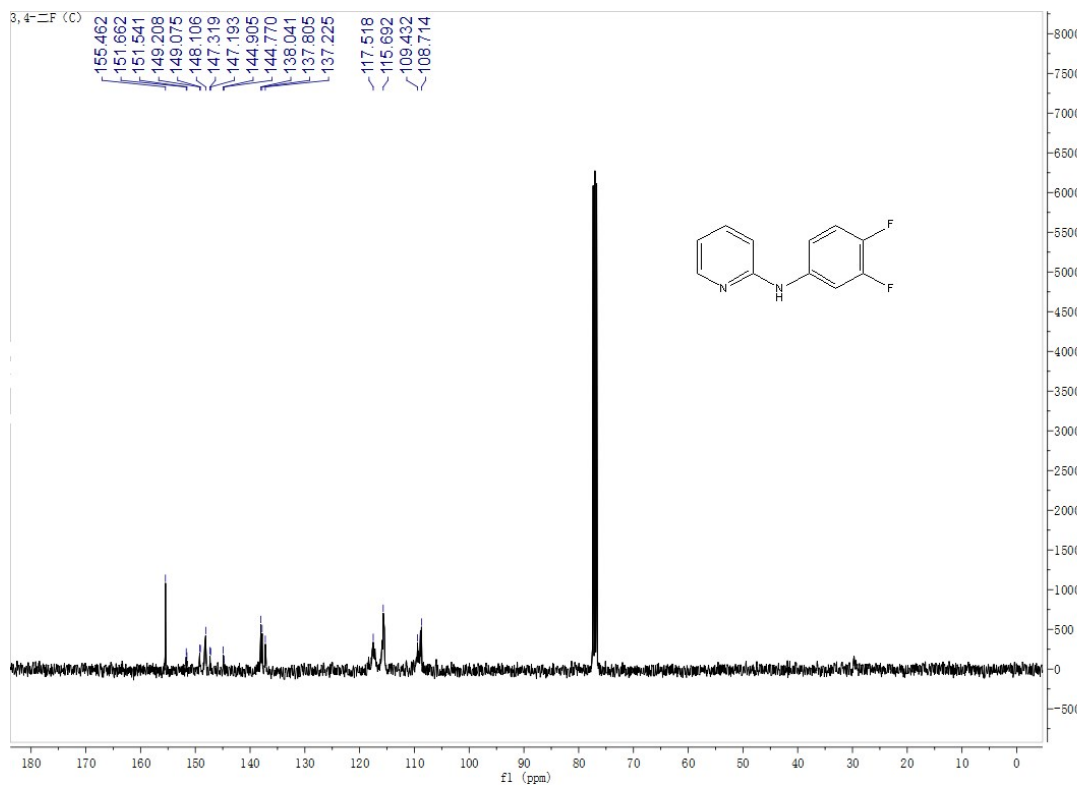

<sup>1</sup>H NMR and <sup>13</sup>C NMR of compound **3p**

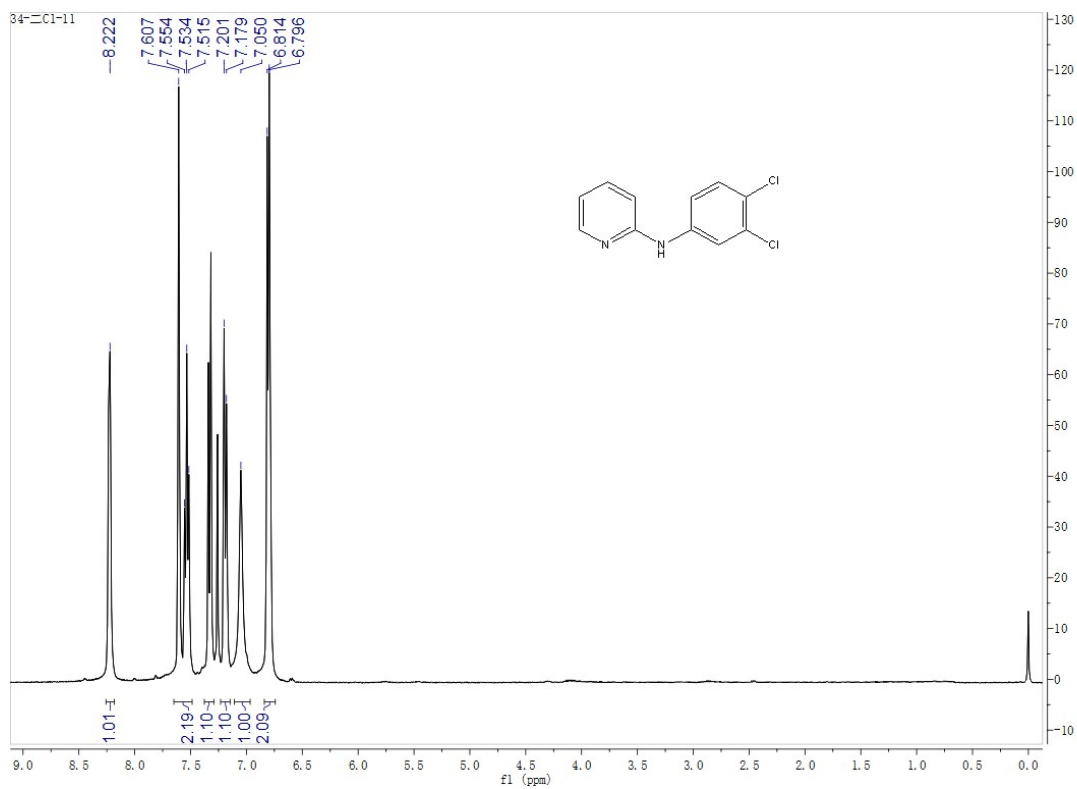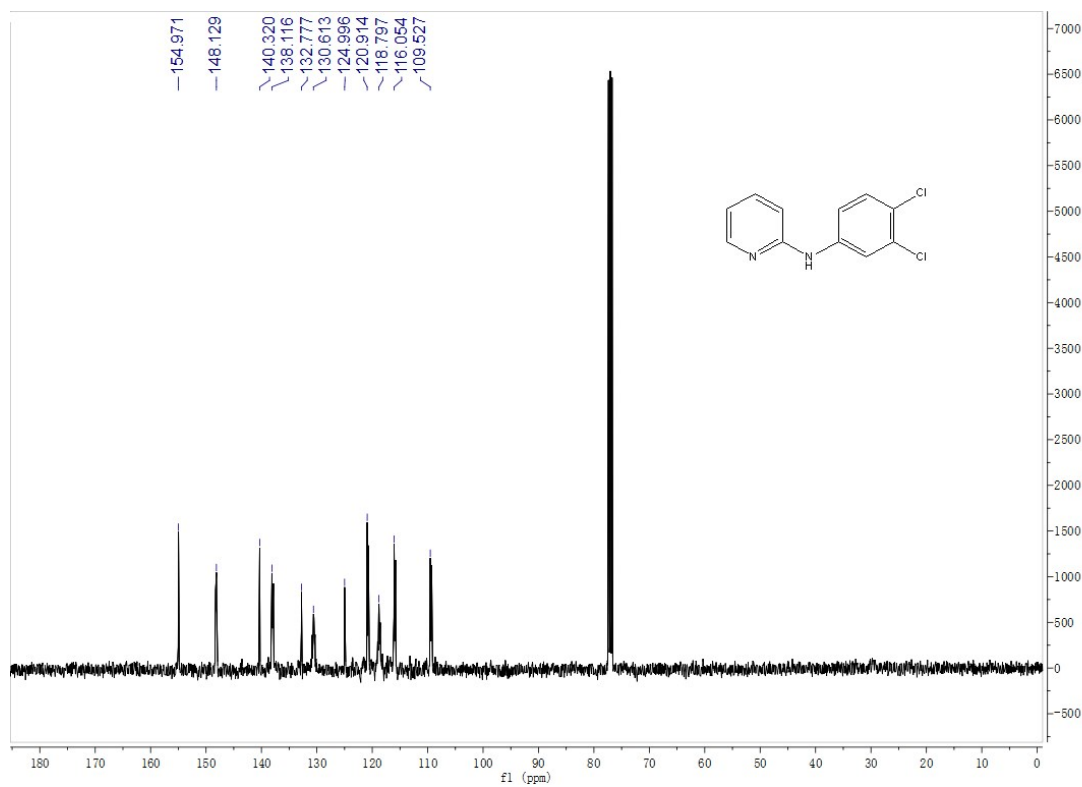

$^1\text{H}$  NMR and  $^{13}\text{C}$  NMR of compound **3q**

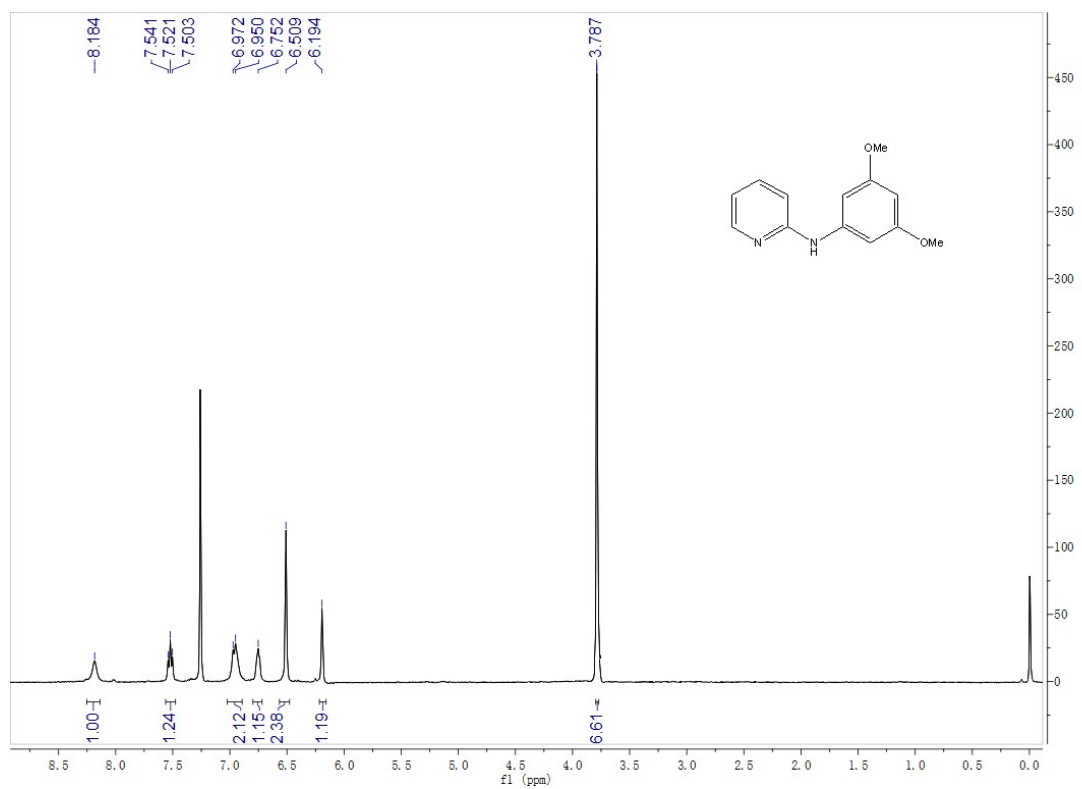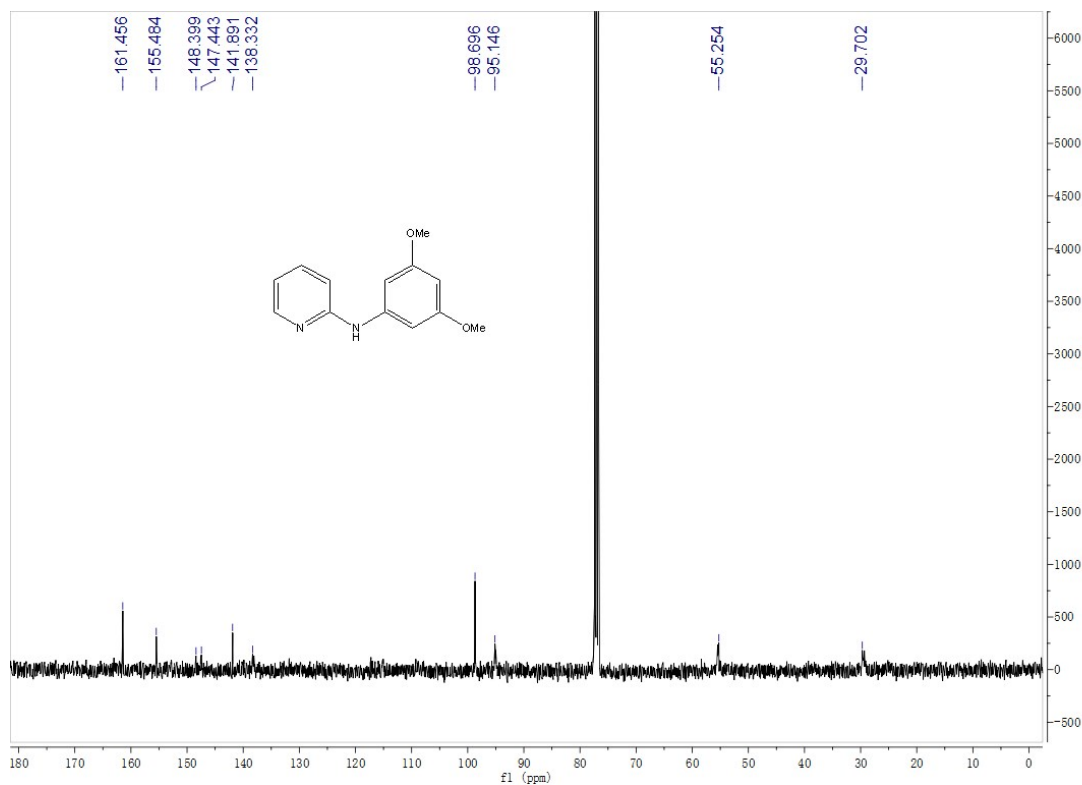

<sup>1</sup>H NMR and <sup>13</sup>C NMR of compound **3r**

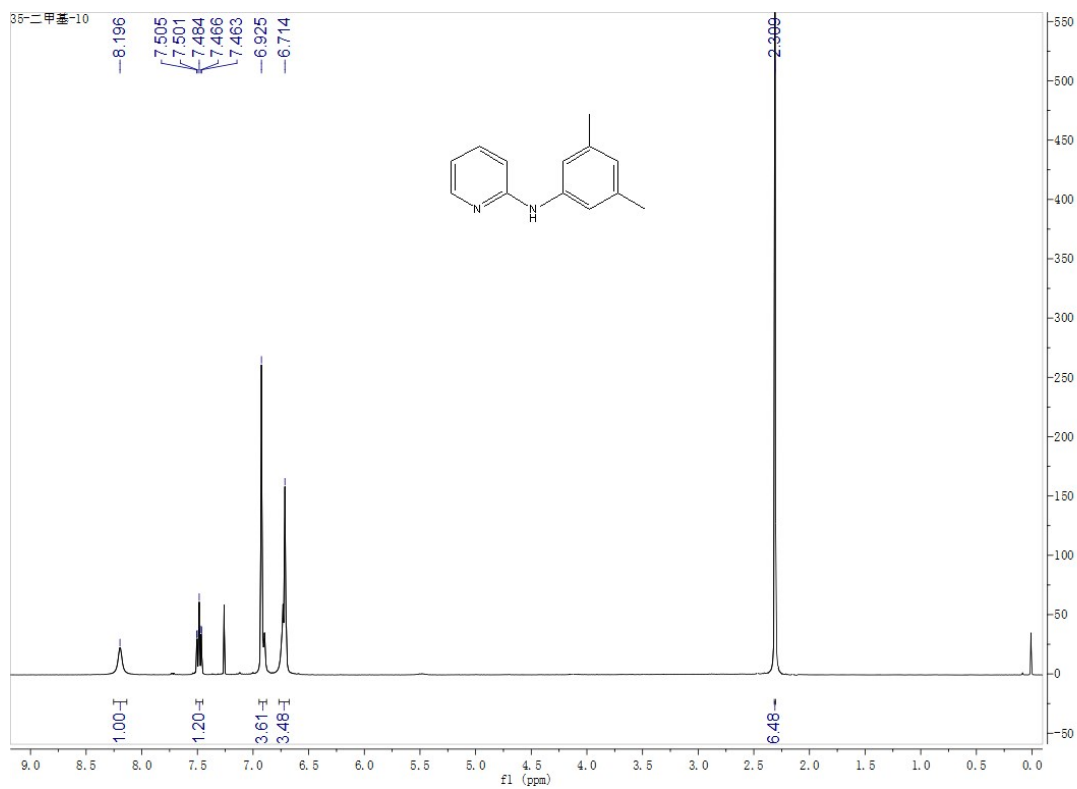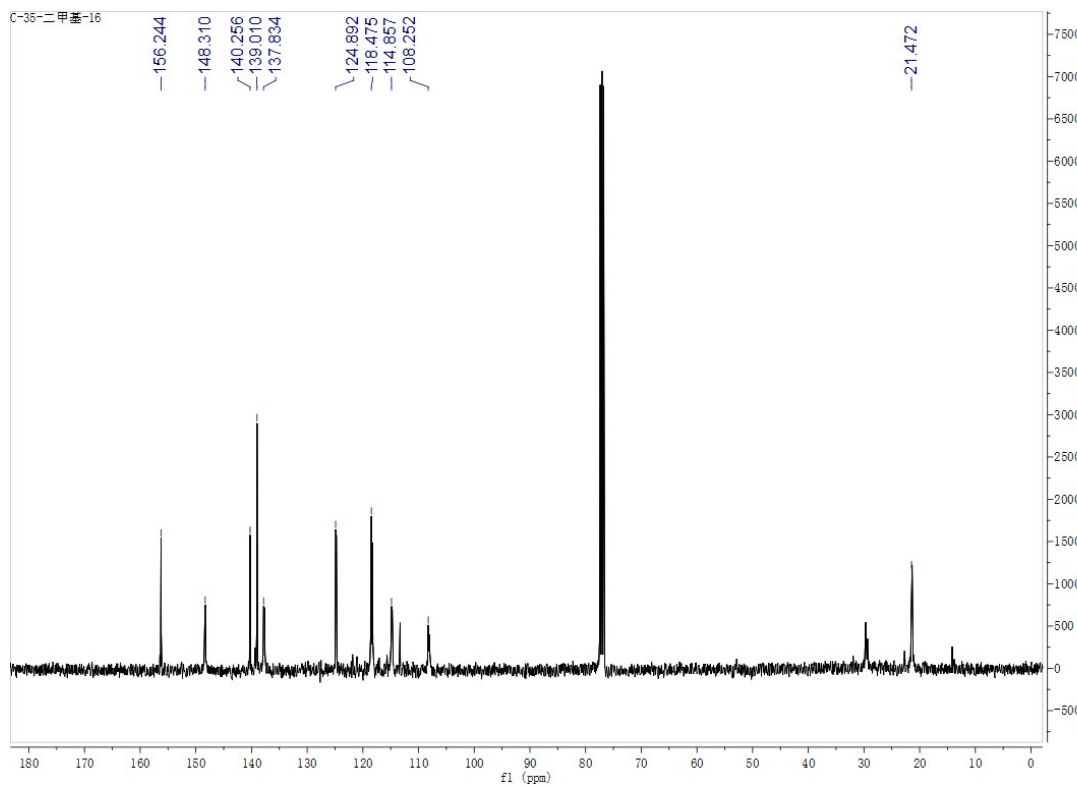

$^1\text{H}$  NMR and  $^{13}\text{C}$  NMR of compound **3s**

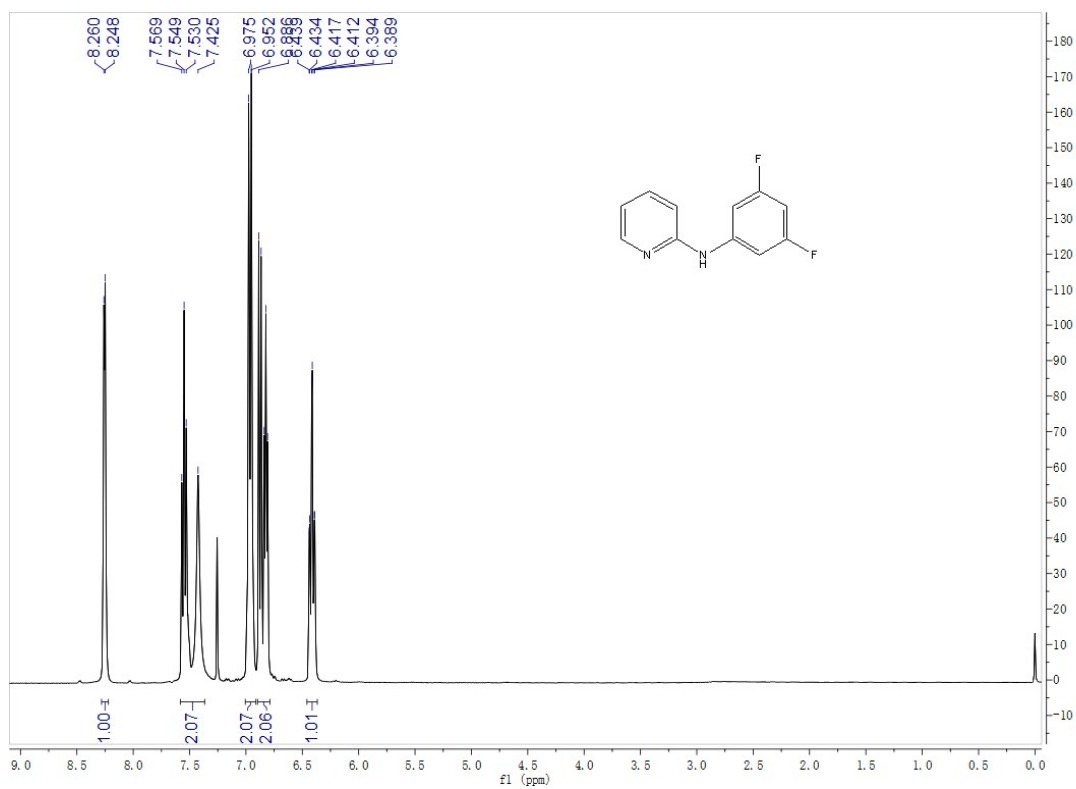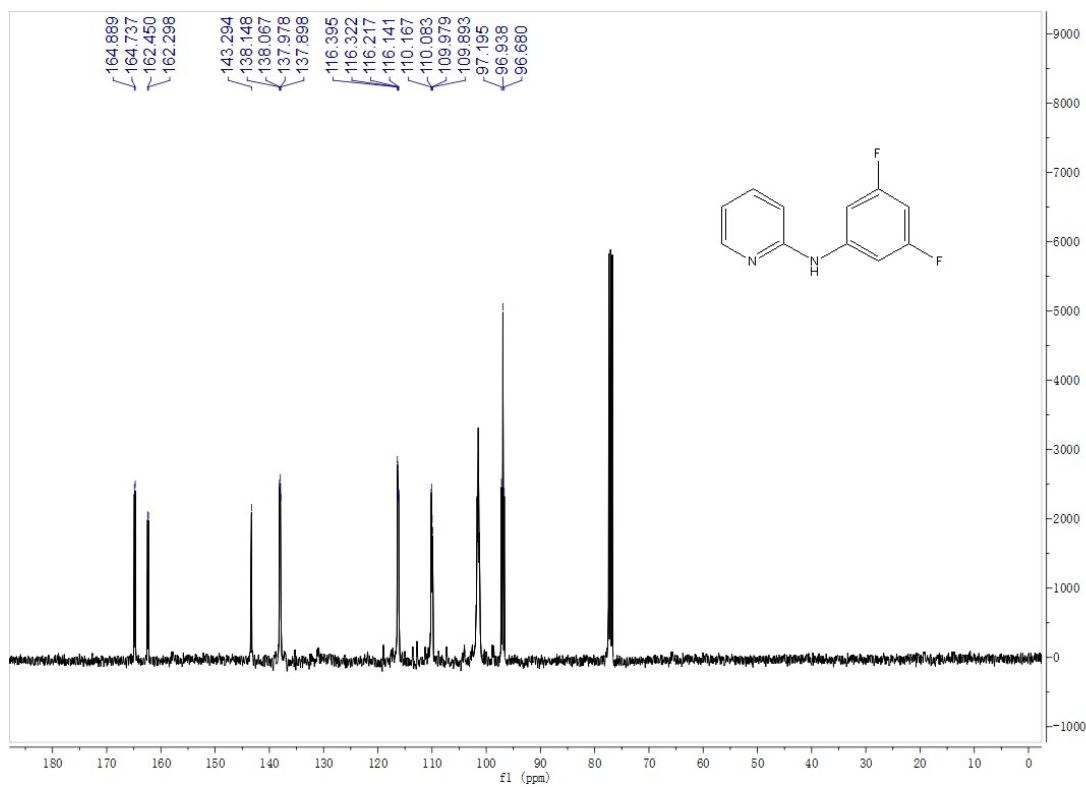

<sup>1</sup>H NMR and <sup>13</sup>C NMR of compound **3t**

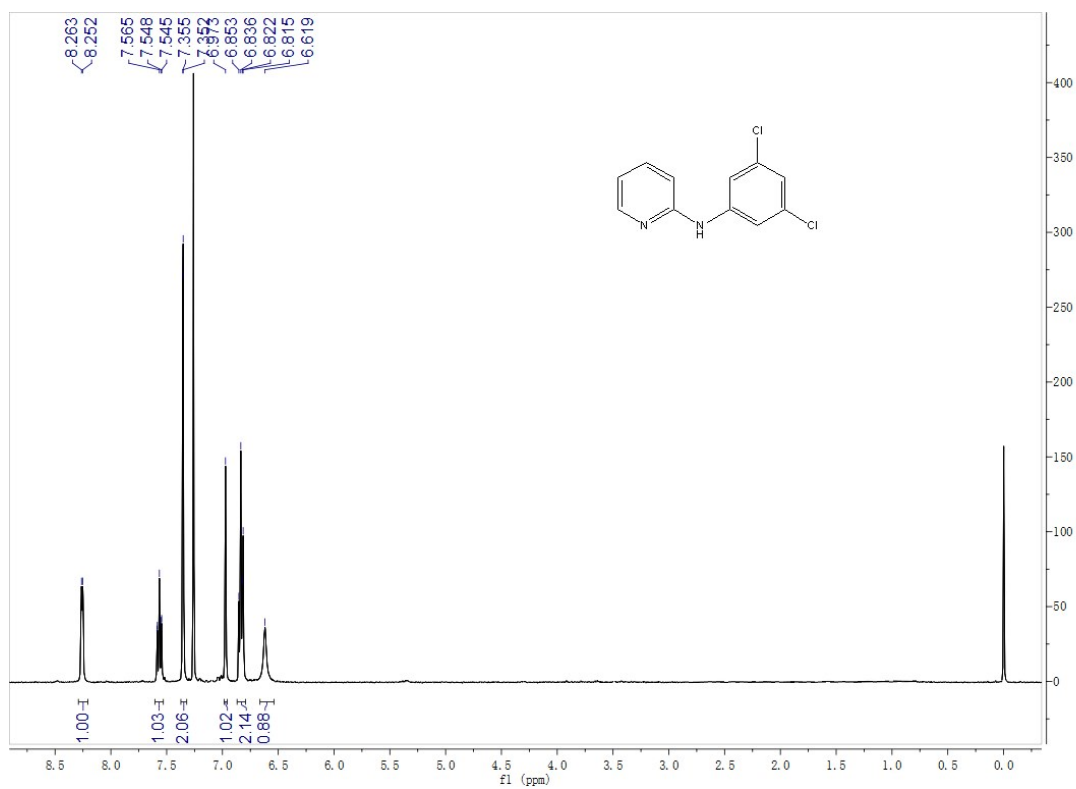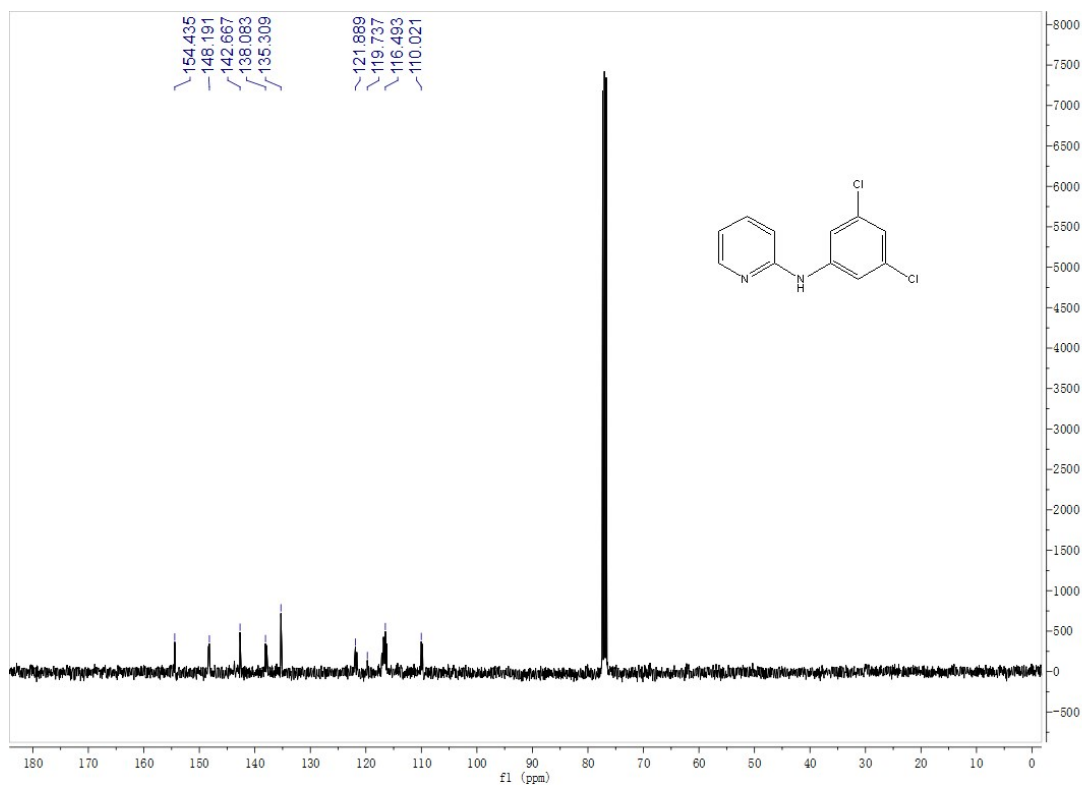

<sup>1</sup>H NMR and <sup>13</sup>C NMR of compound **3u**

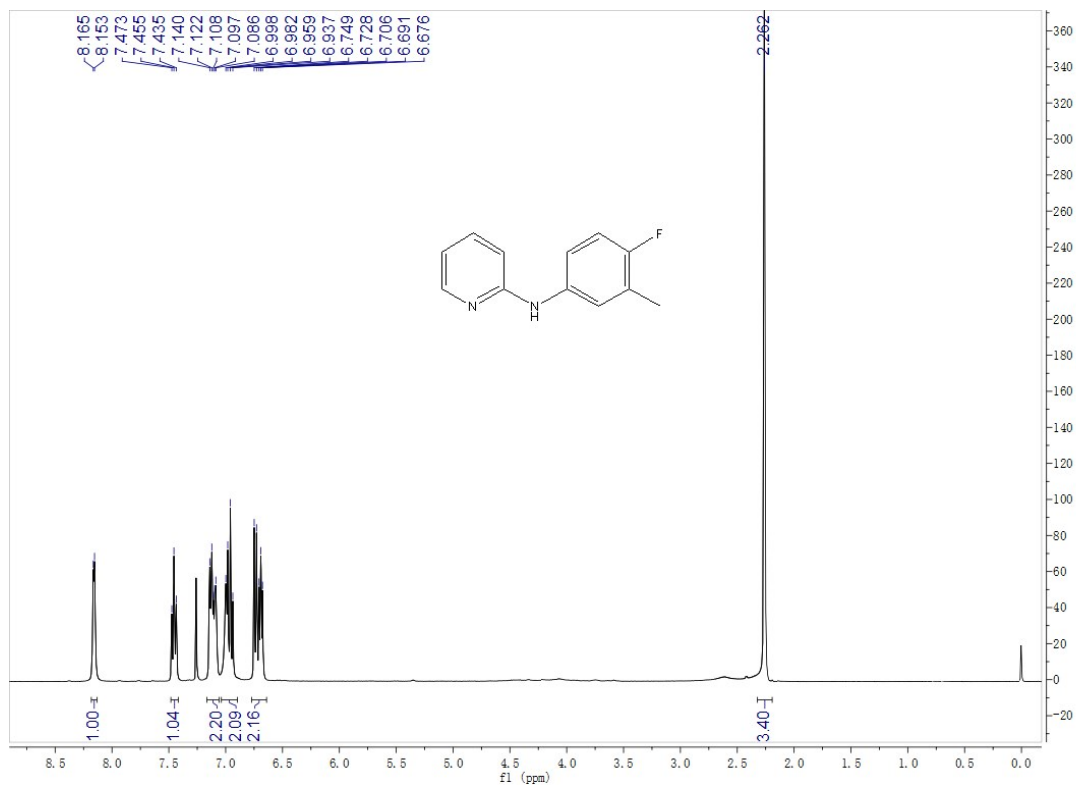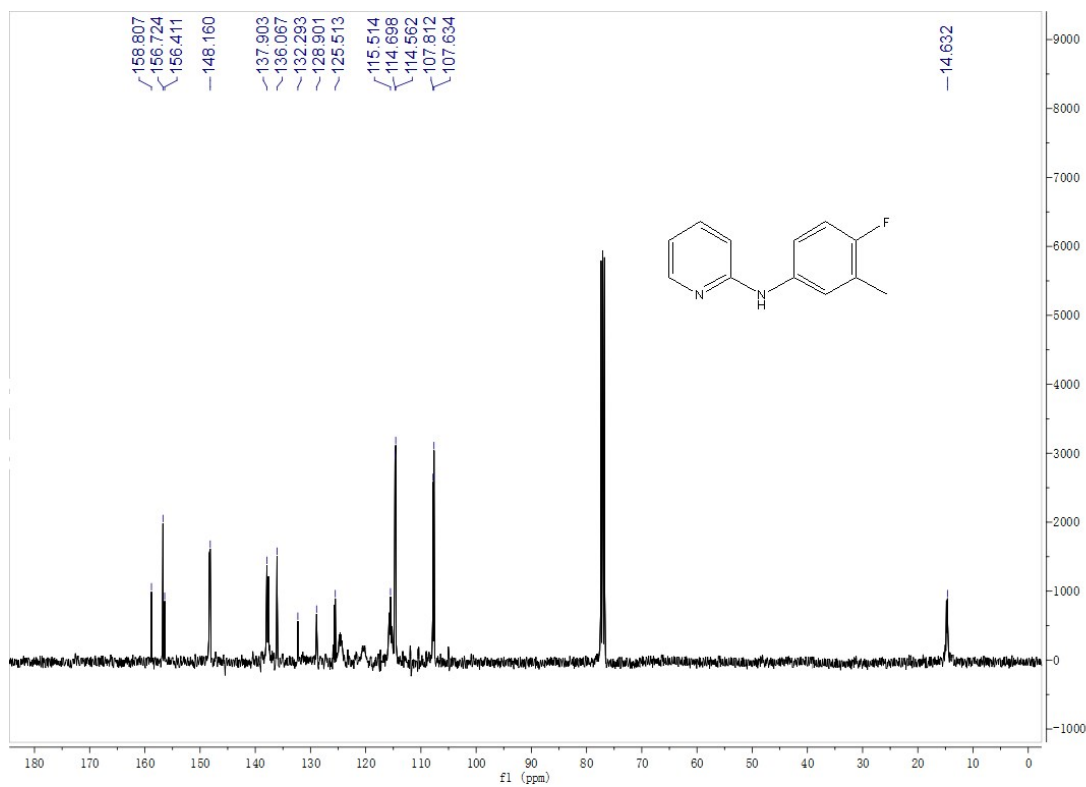

<sup>1</sup>H NMR and <sup>13</sup>C NMR of compound **3v**

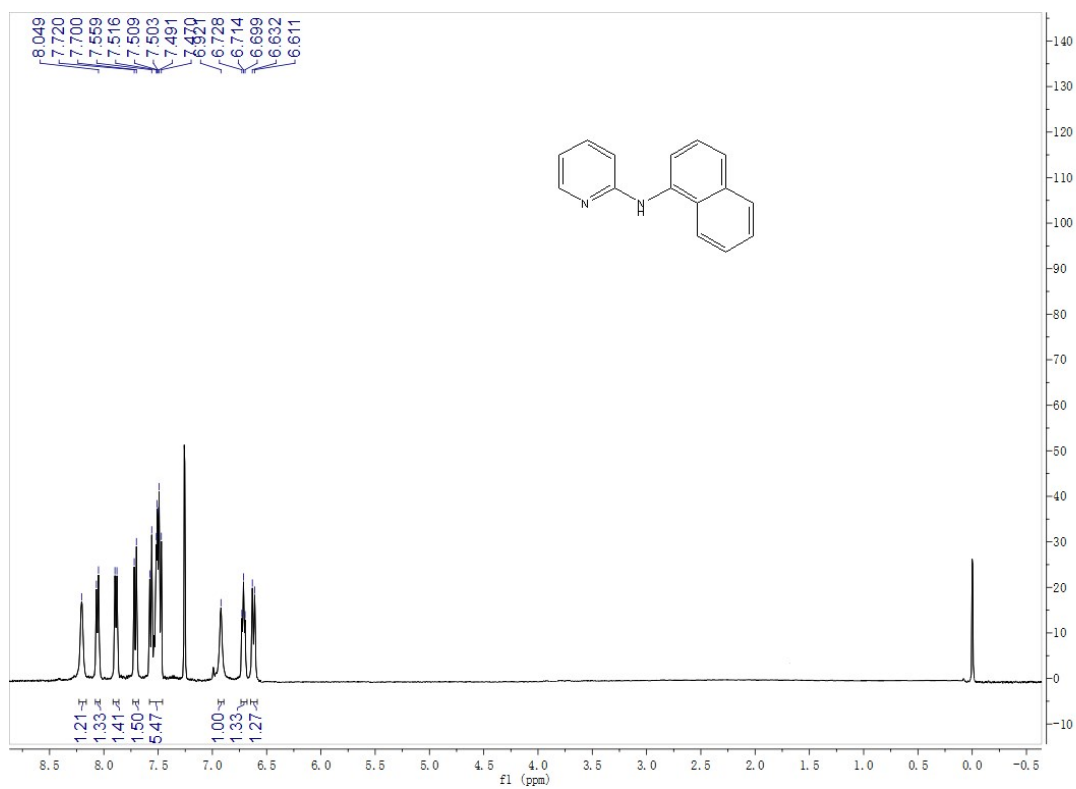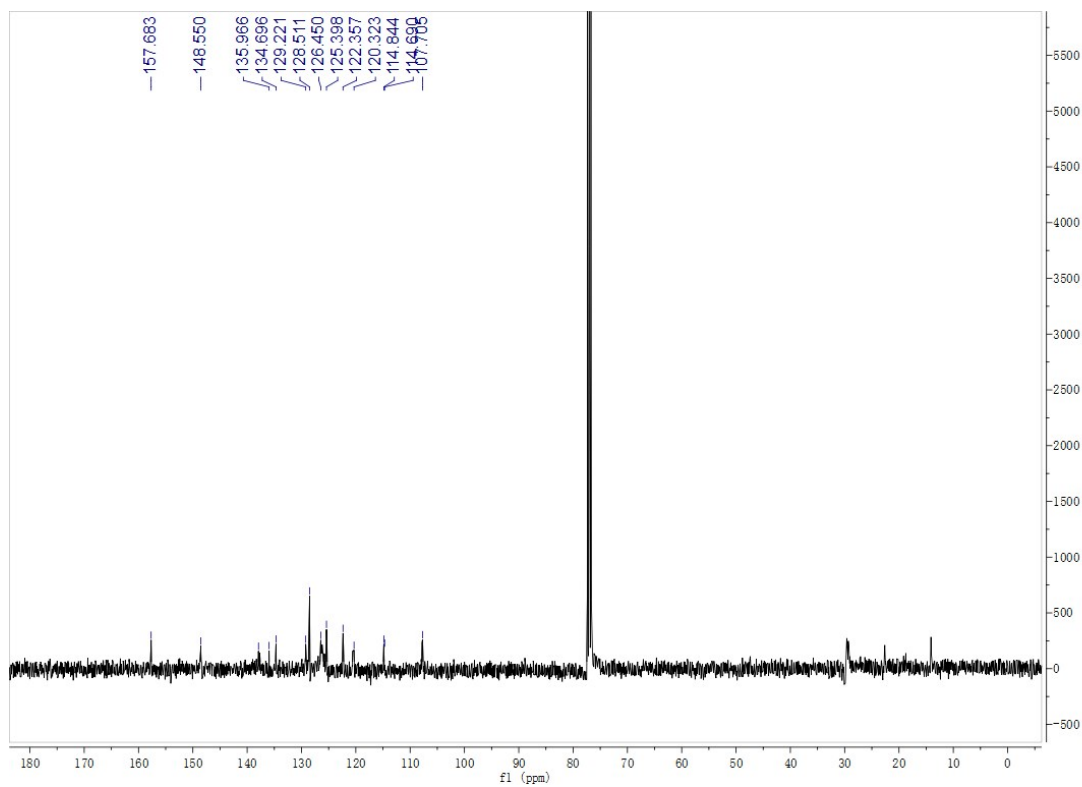

<sup>1</sup>H NMR and <sup>13</sup>C NMR of compound **3w**



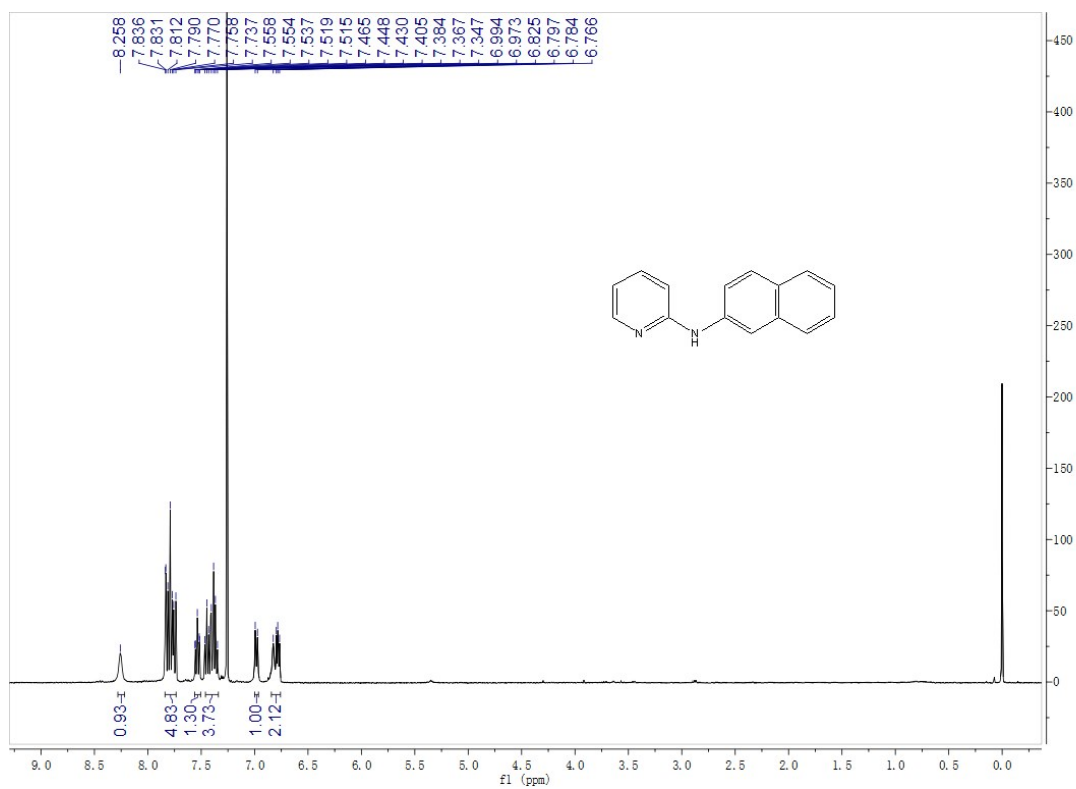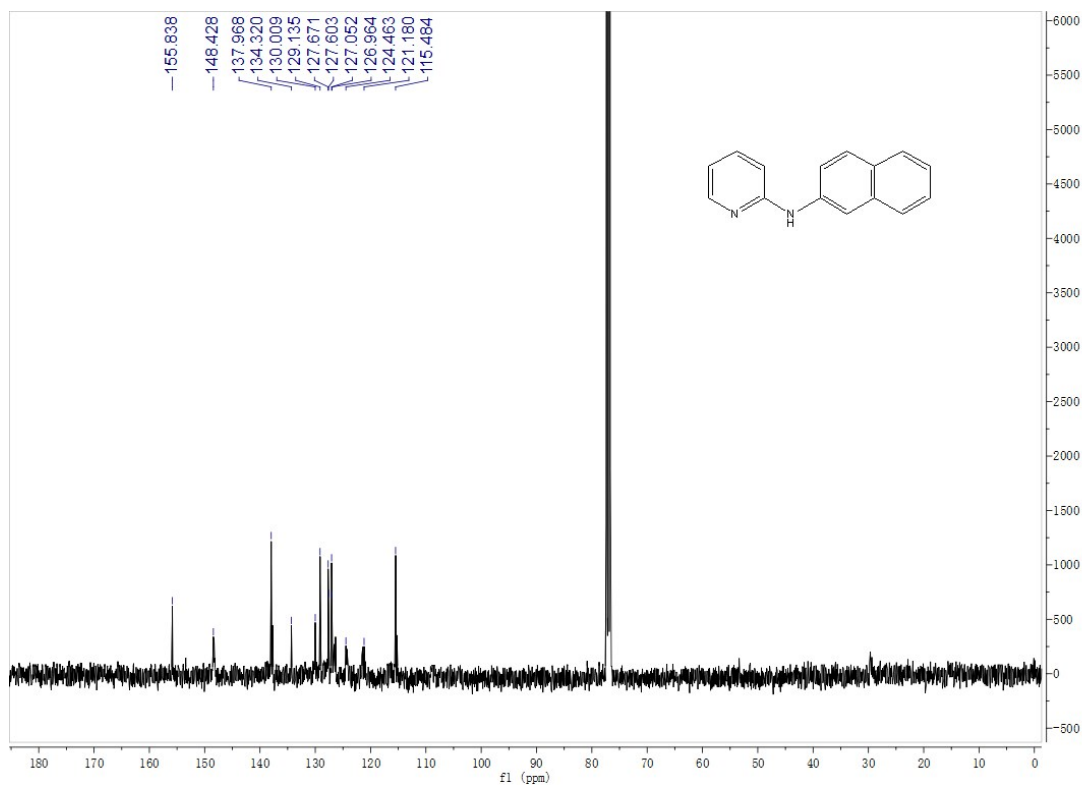

$^1\text{H}$  NMR and  $^{13}\text{C}$  NMR of compound **3x**

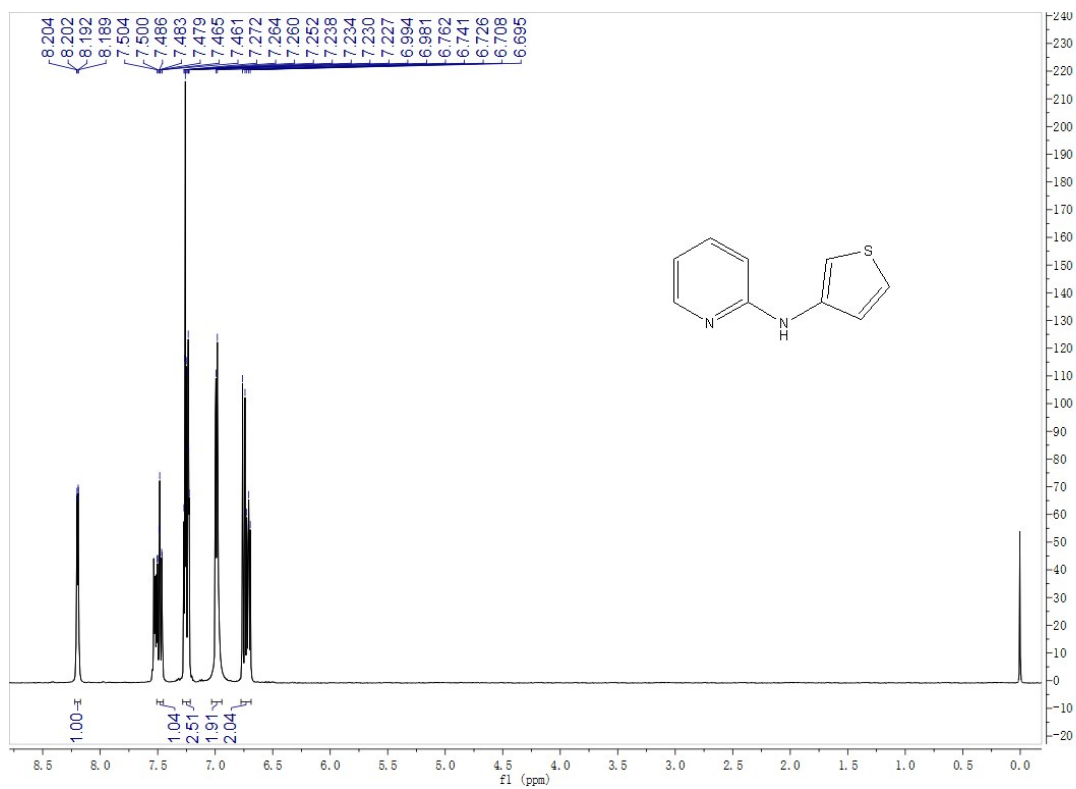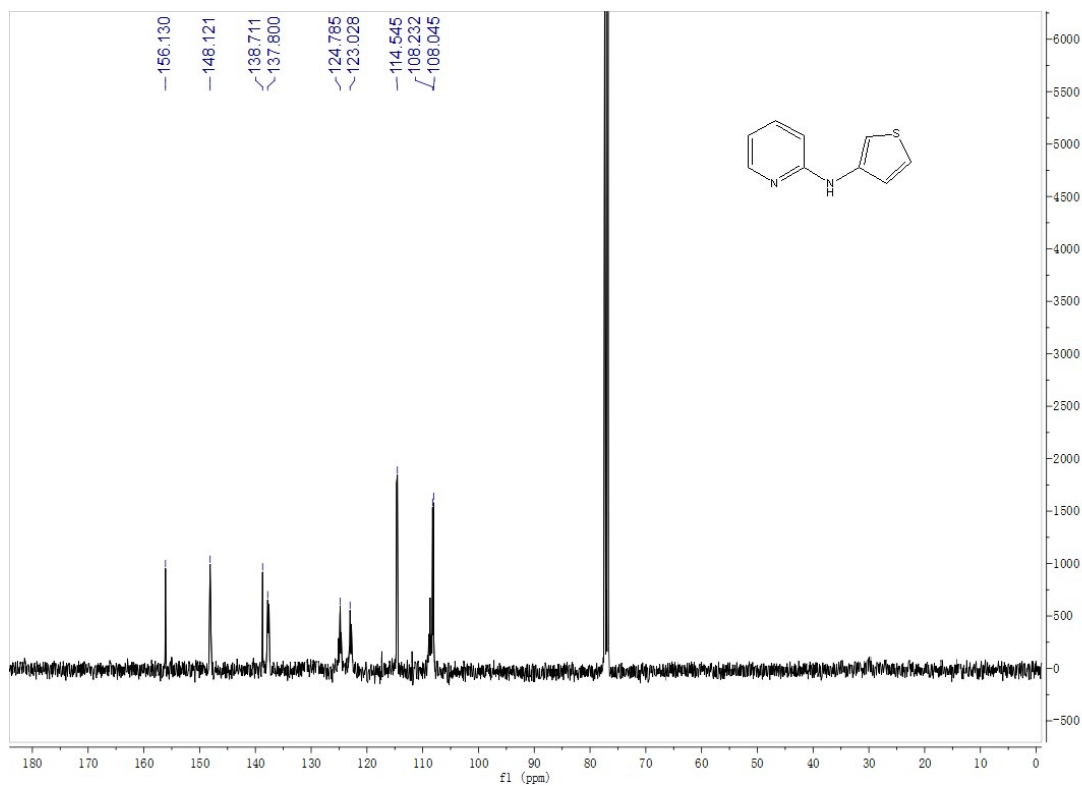

<sup>1</sup>H NMR and <sup>13</sup>C NMR of compound 3y

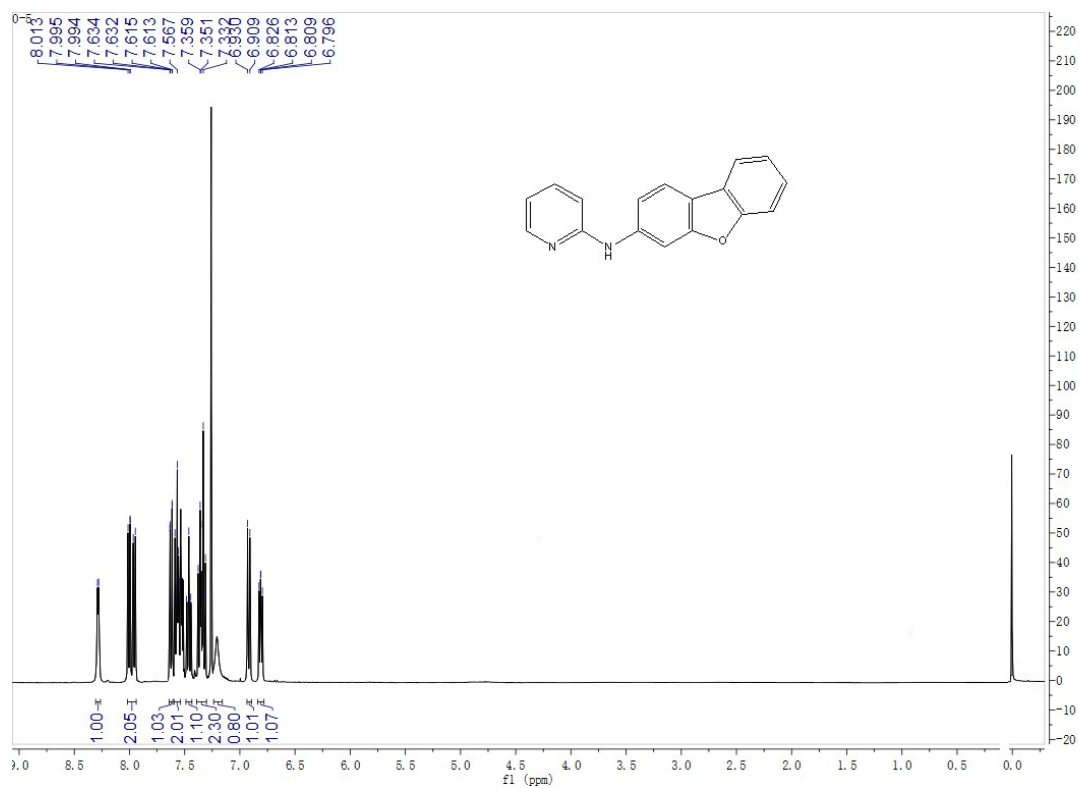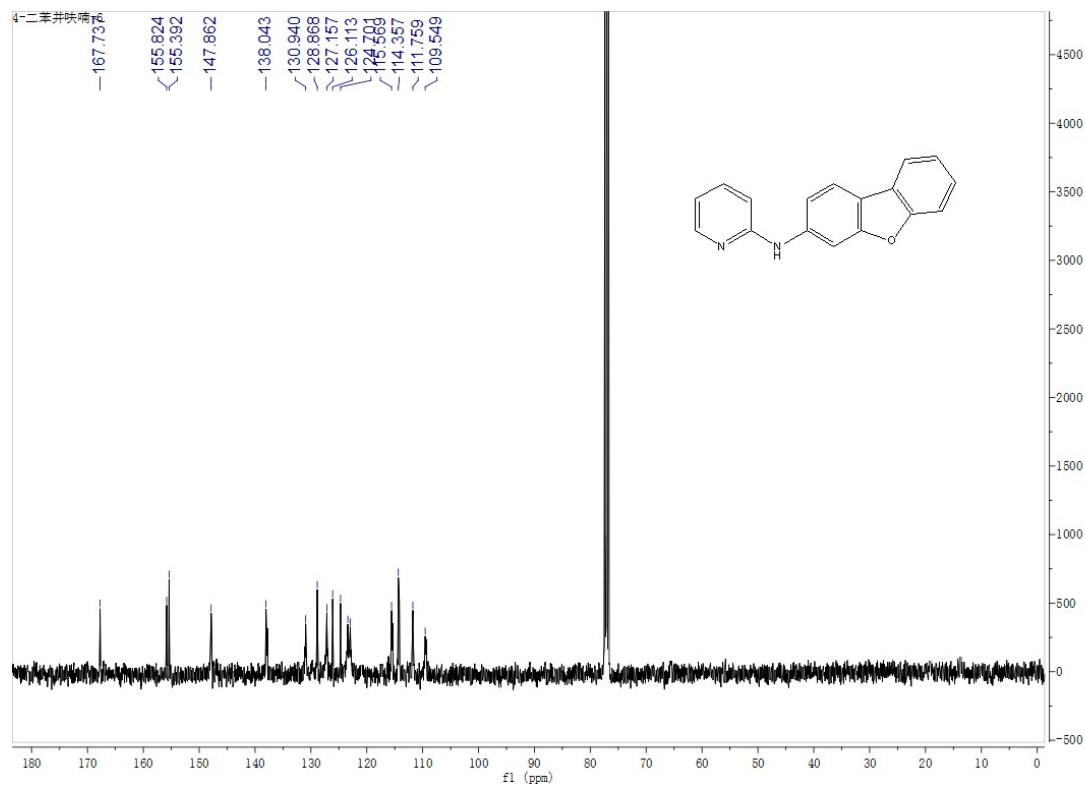

$^1\text{H}$  NMR and  $^{13}\text{C}$  NMR of compound **3z**

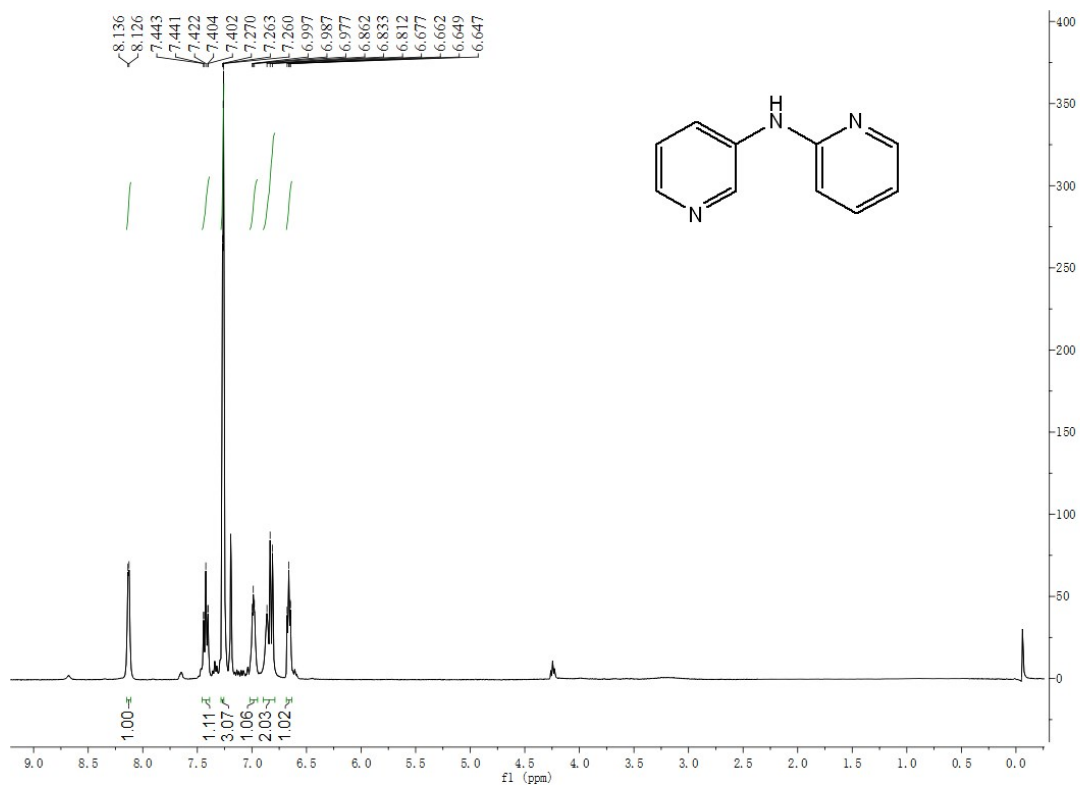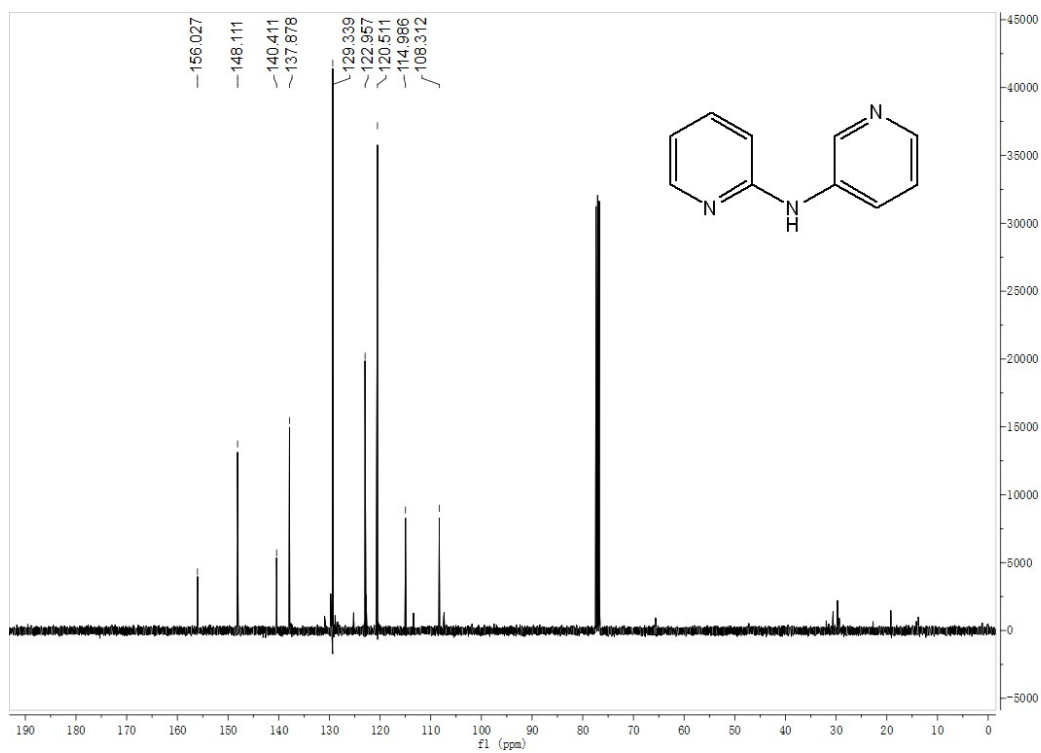

<sup>1</sup>H NMR and <sup>13</sup>C NMR of compound 3aa

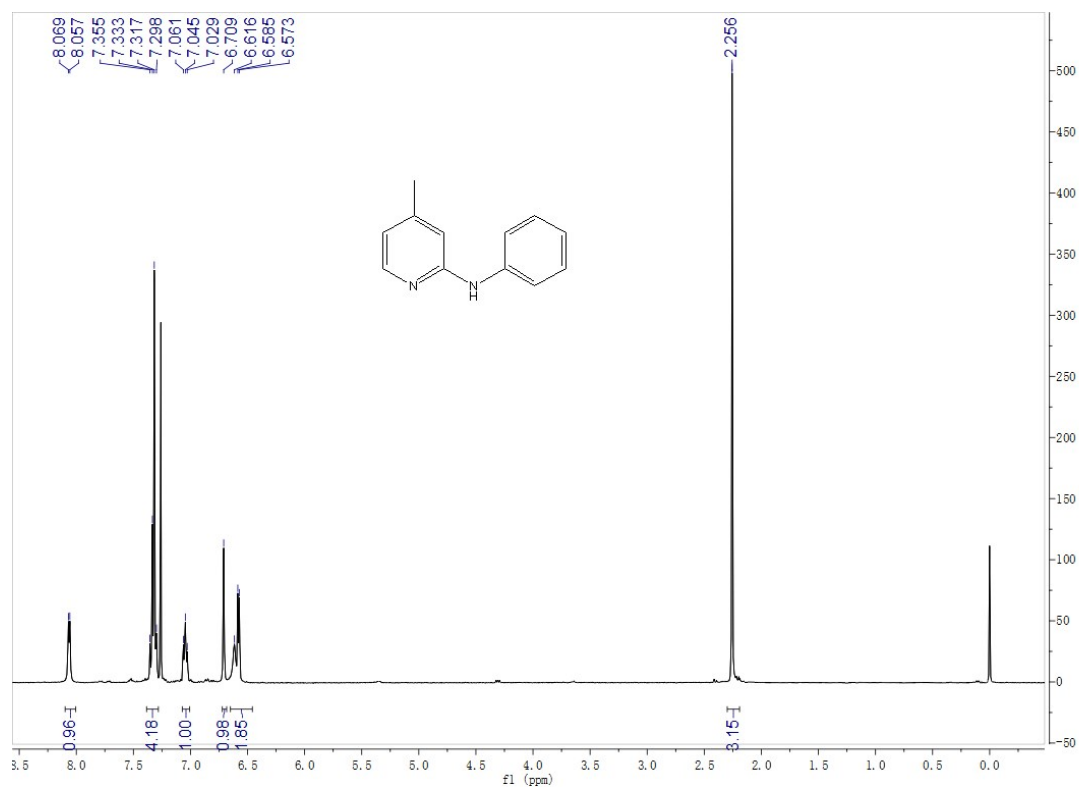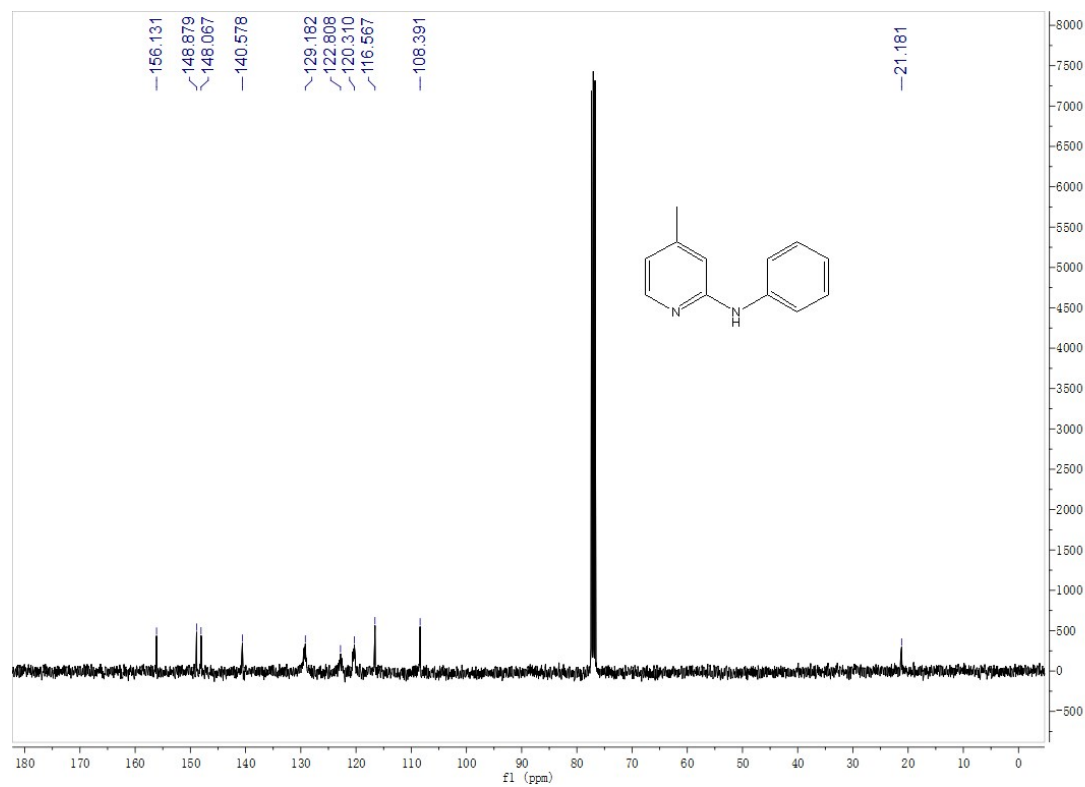

<sup>1</sup>H NMR and <sup>13</sup>C NMR of compound **3ab**

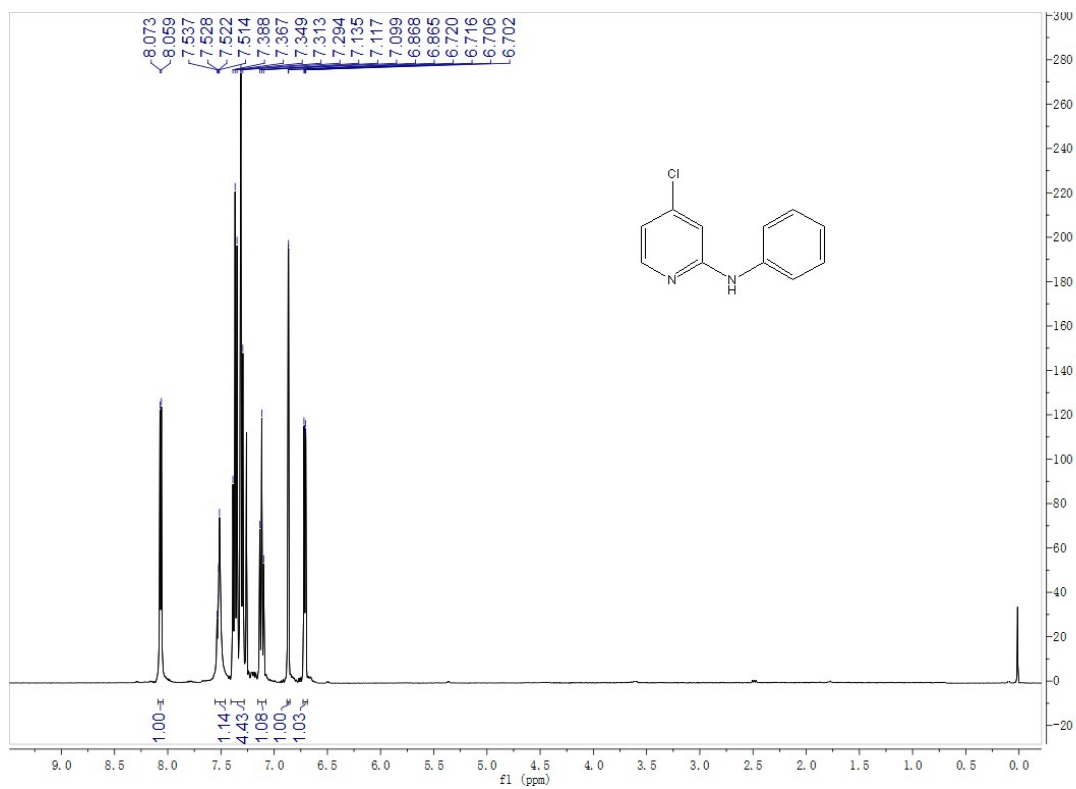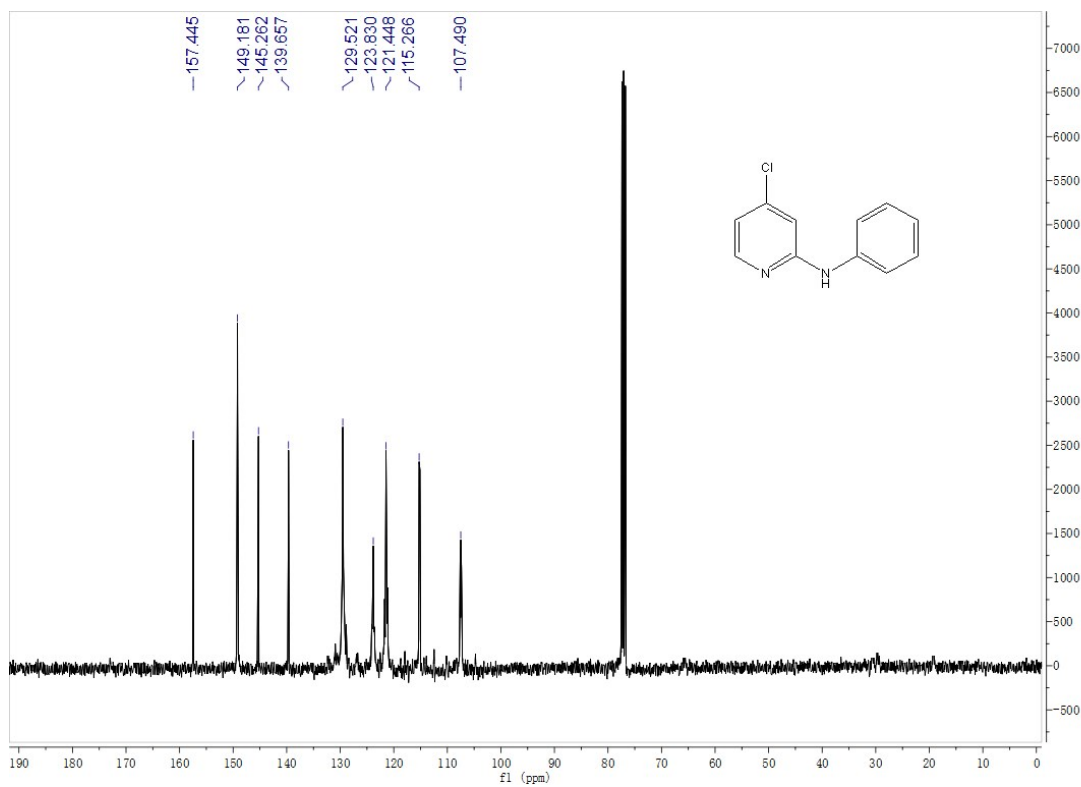

$^1\text{H}$  NMR and  $^{13}\text{C}$  NMR of compound **3ac**

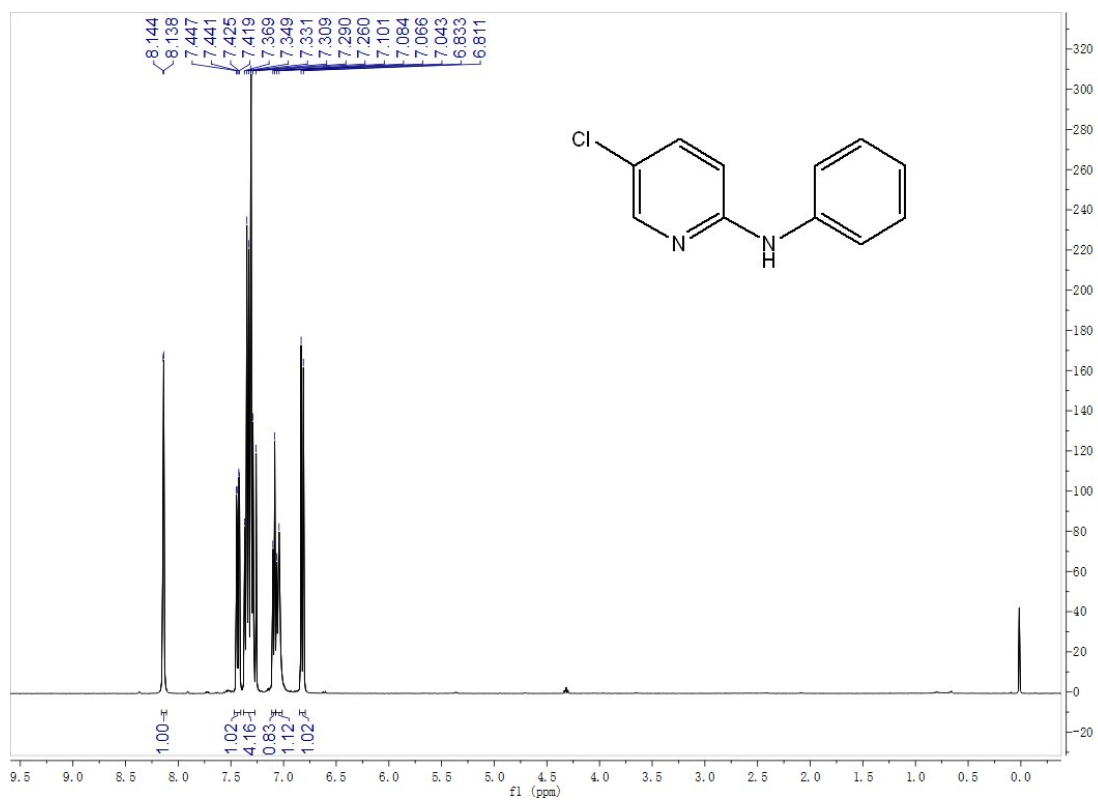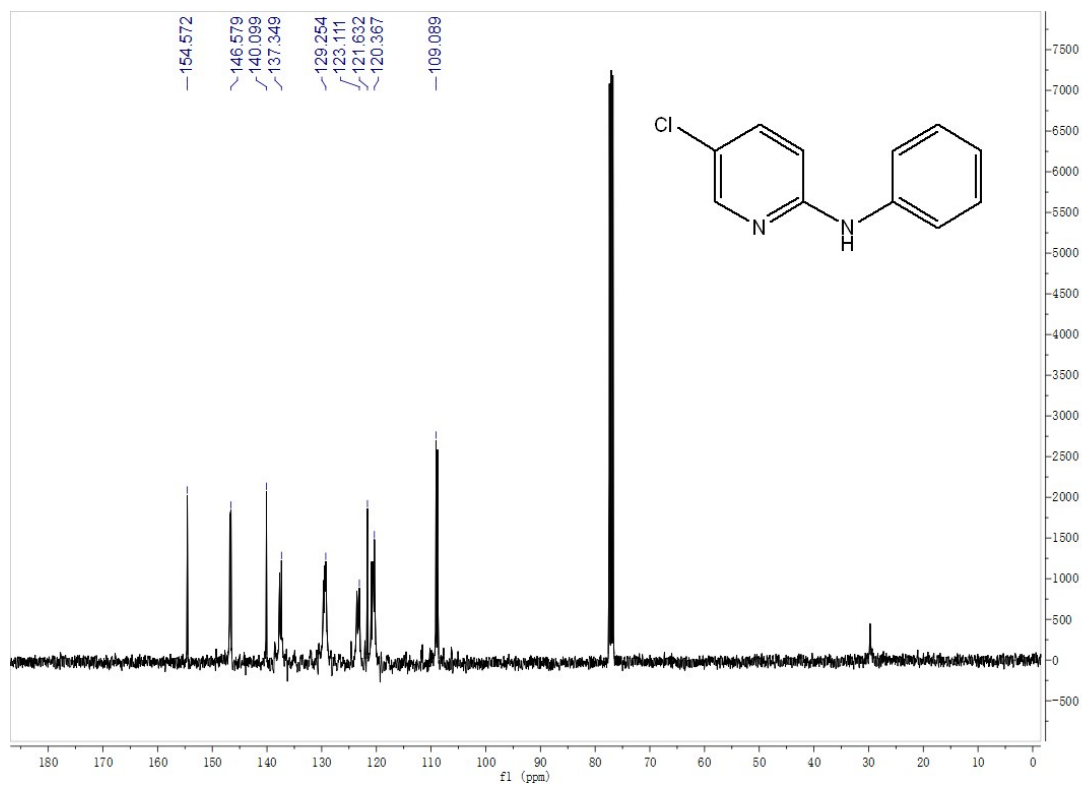

<sup>1</sup>H NMR and <sup>13</sup>C NMR of compound **3ad**.

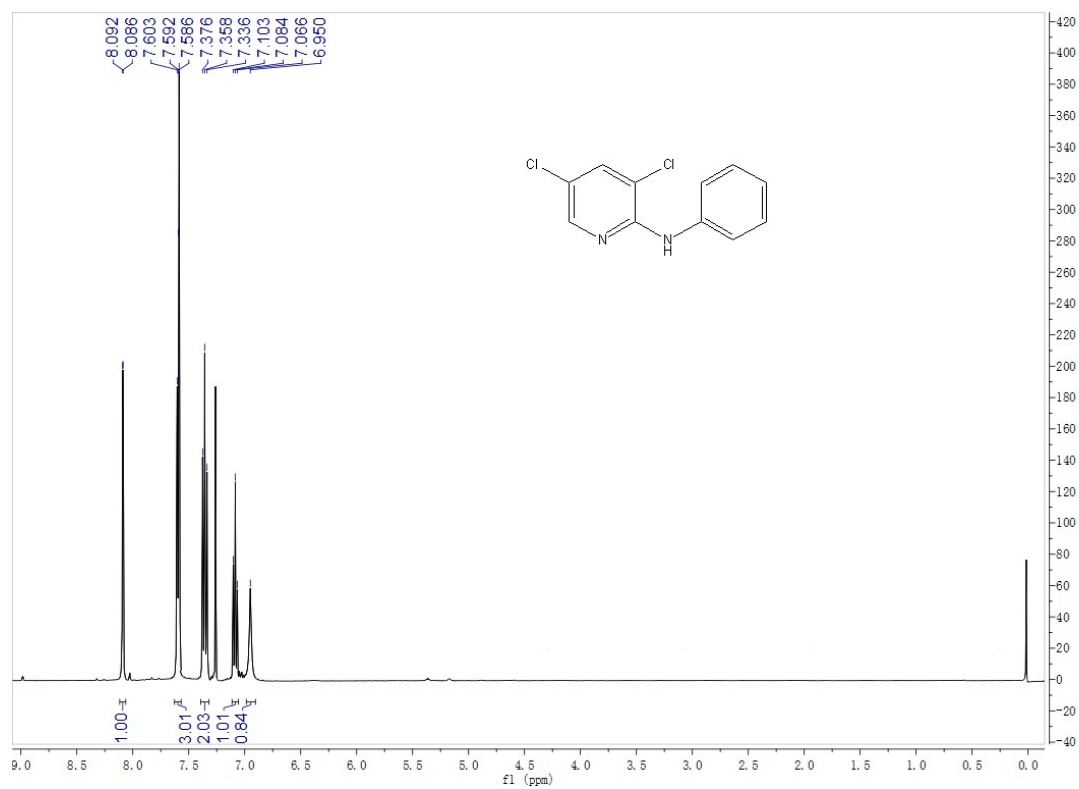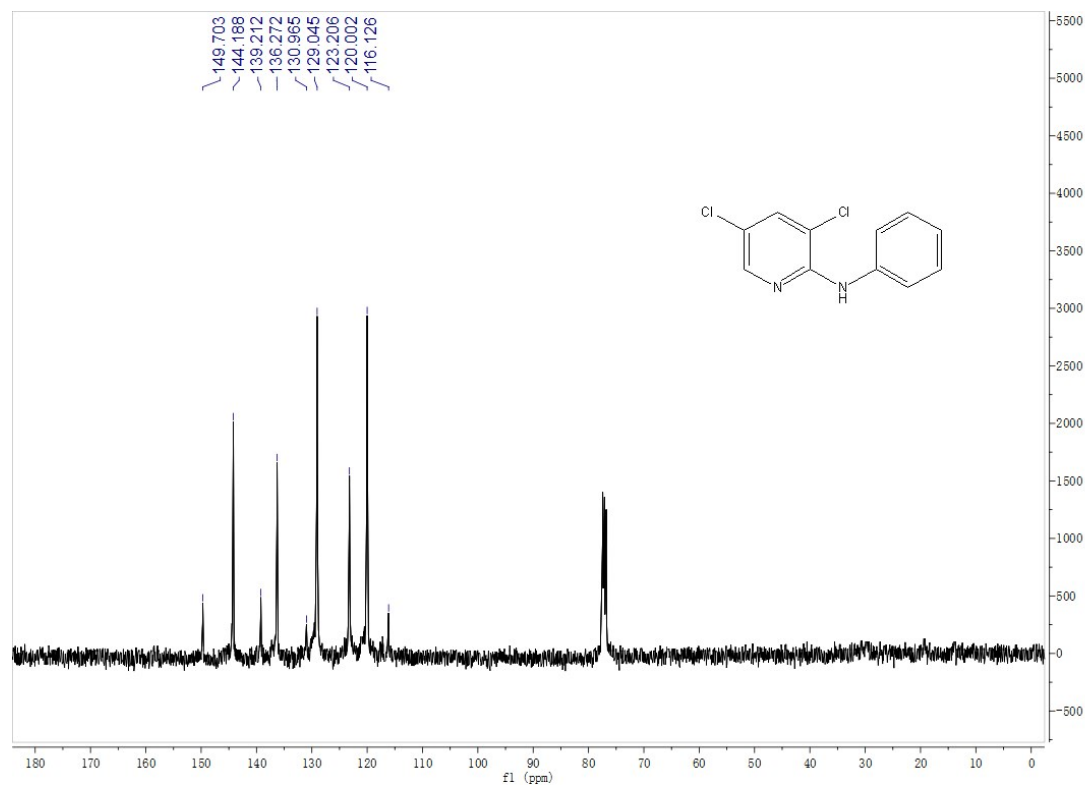

$^1\text{H}$  NMR and  $^{13}\text{C}$  NMR of compound **3ae**



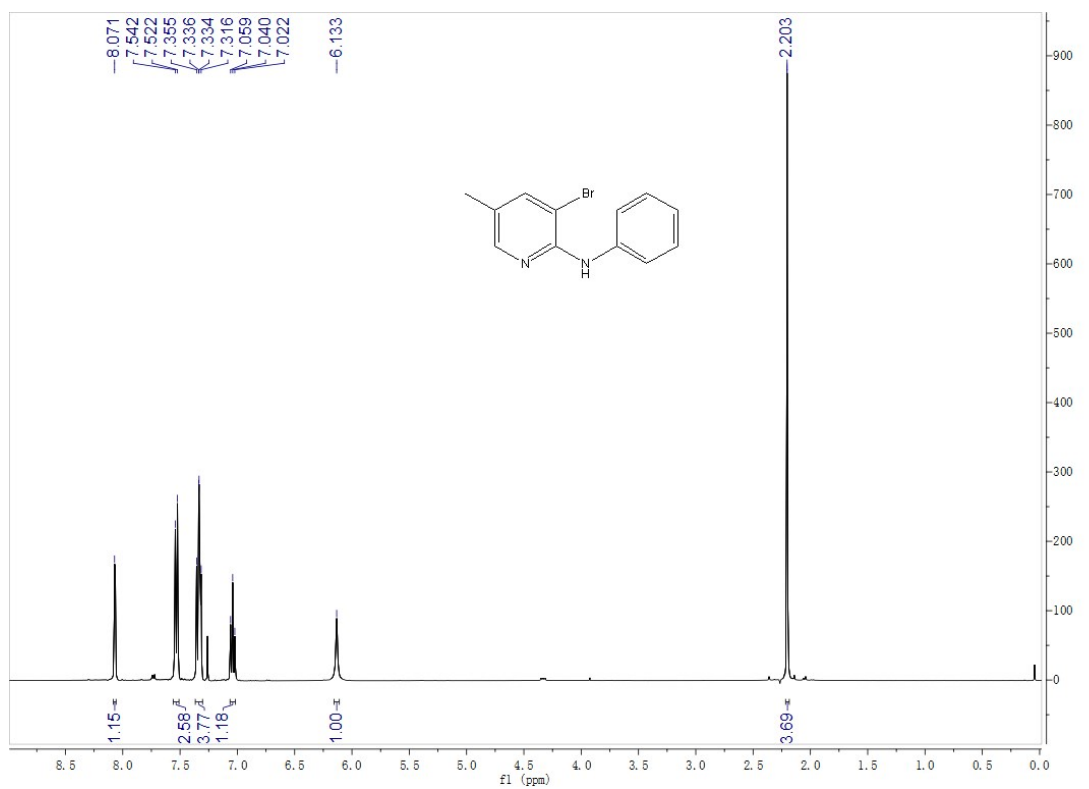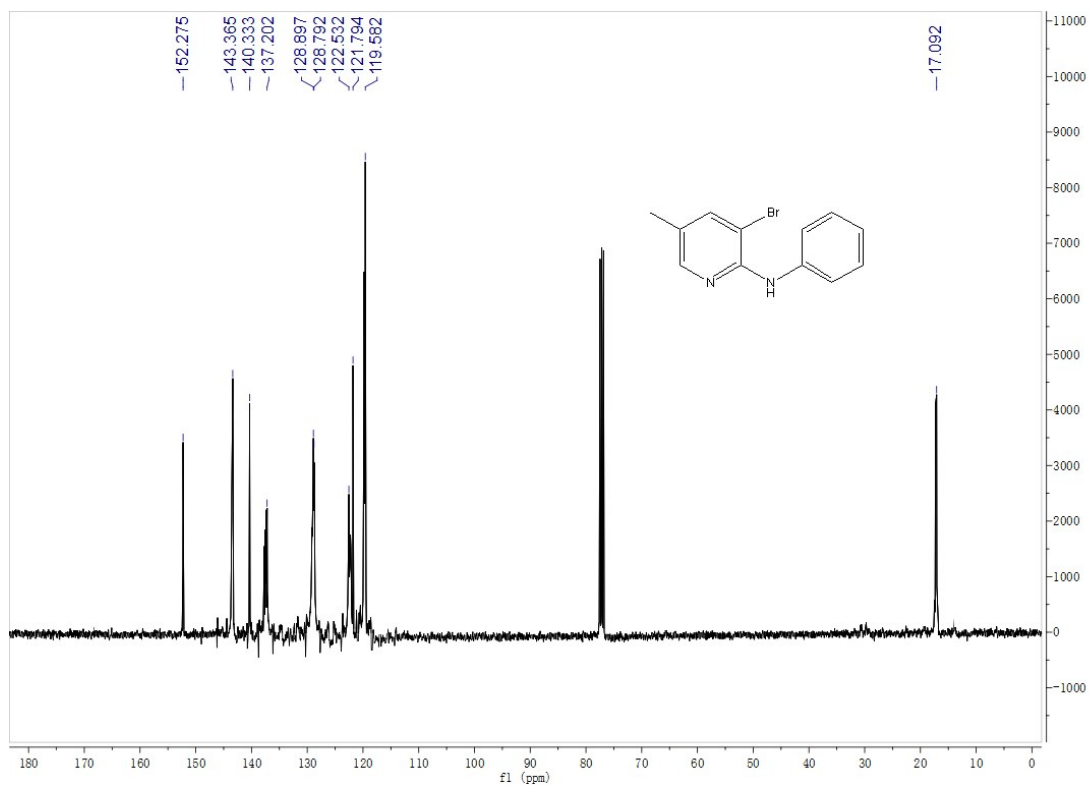

<sup>1</sup>H NMR and <sup>13</sup>C NMR of compound **3af**

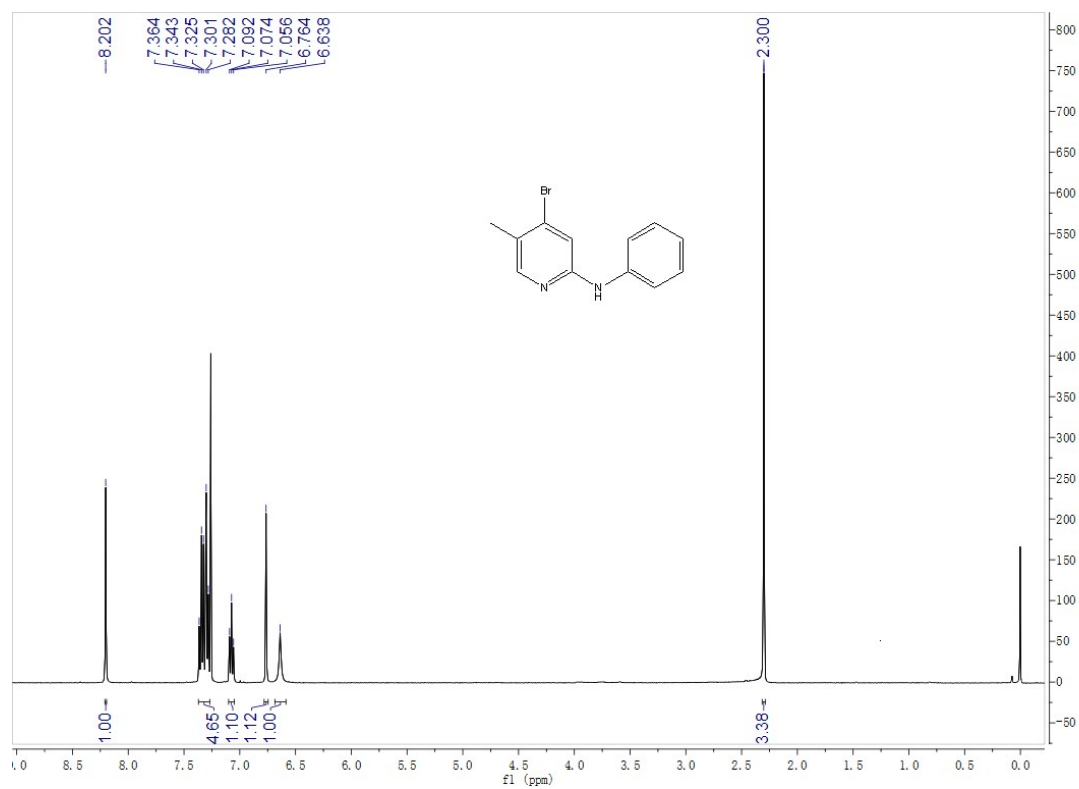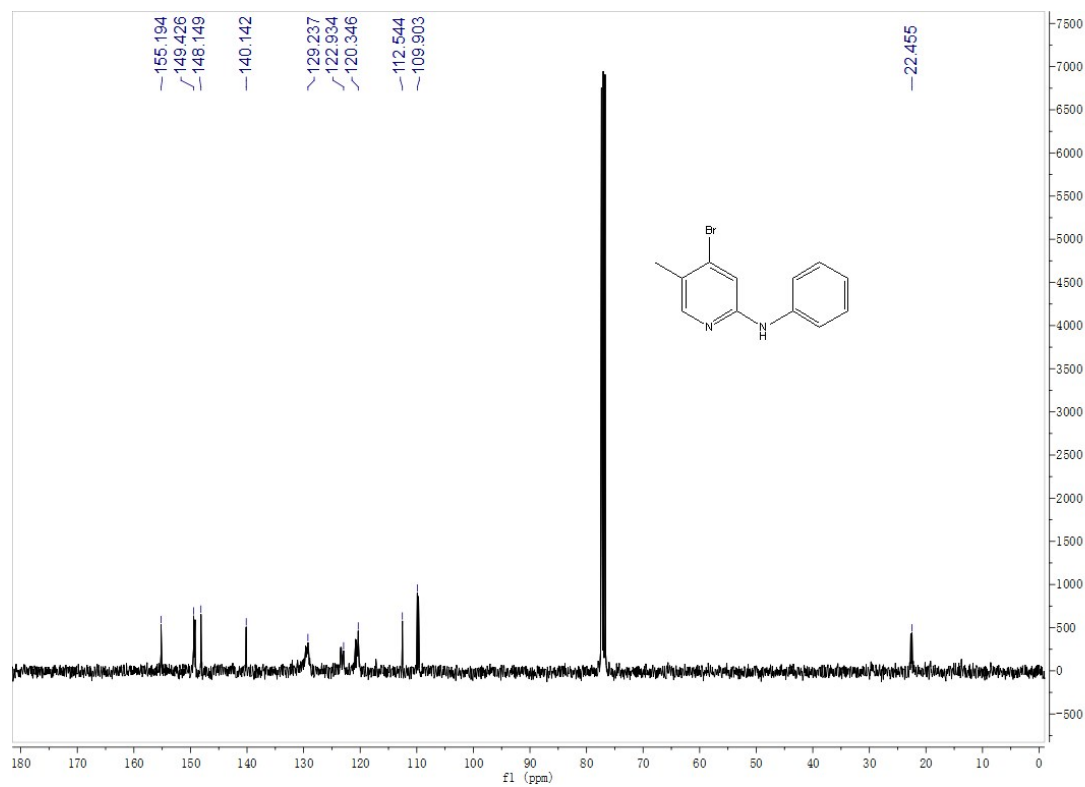

<sup>1</sup>H NMR and <sup>13</sup>C NMR of compound **3ag**

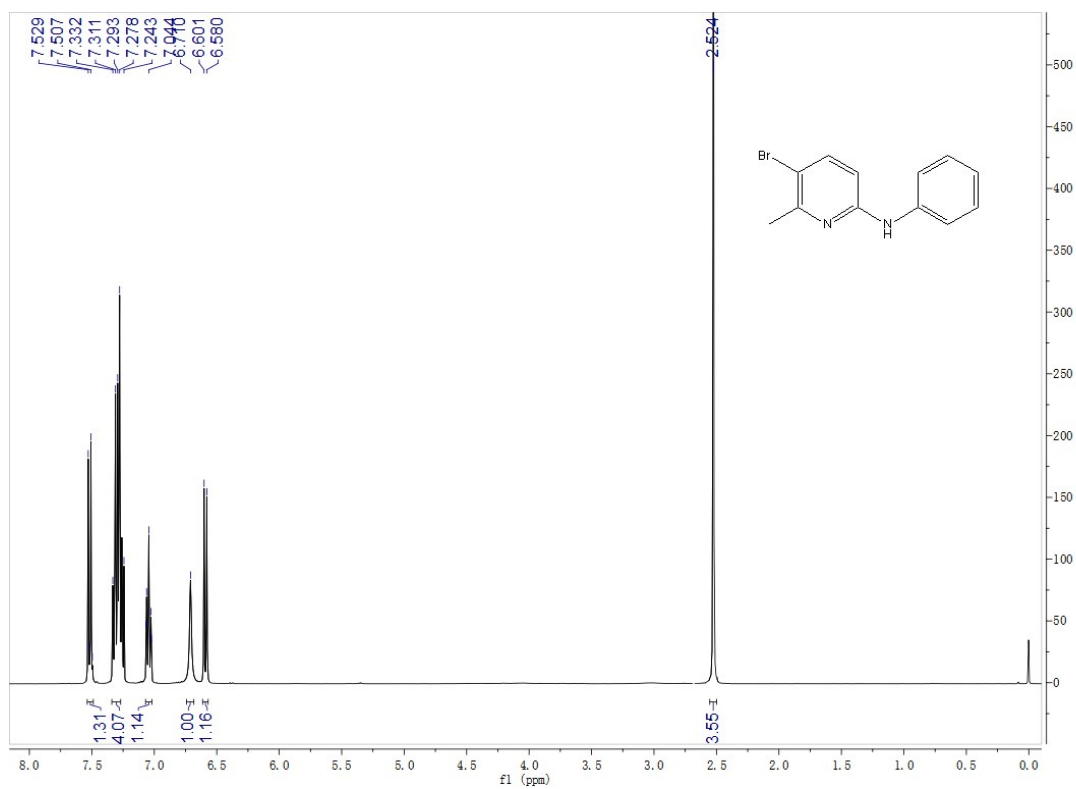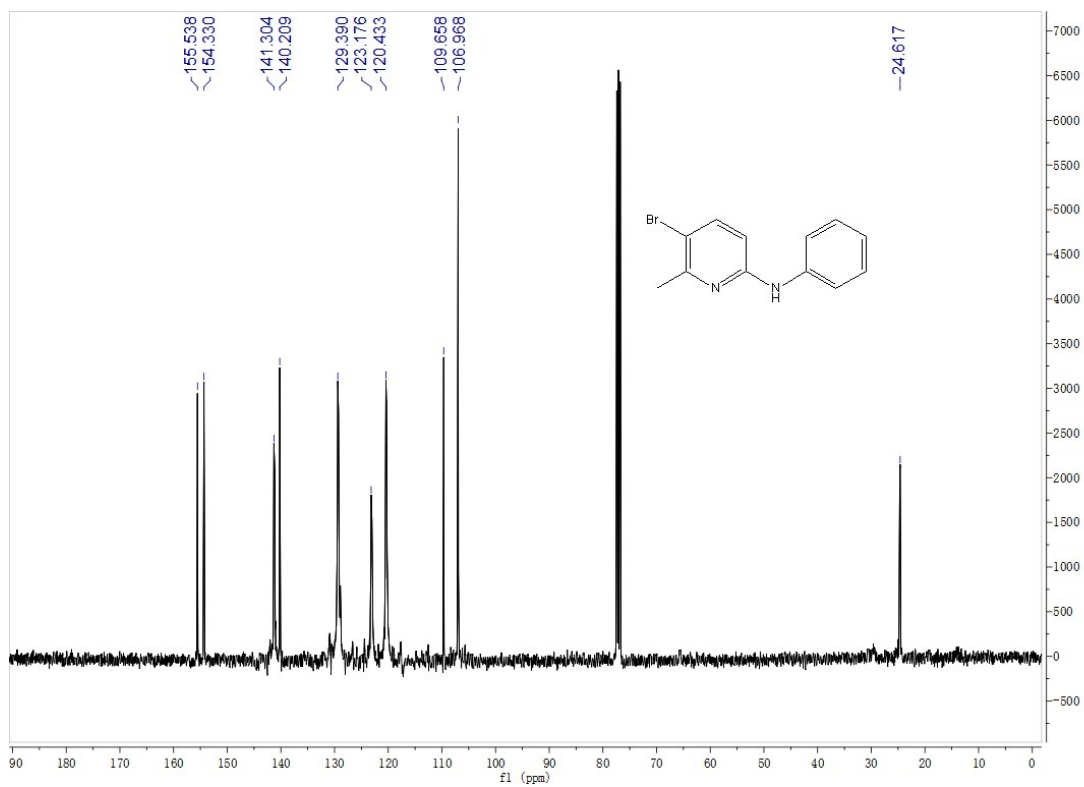

<sup>1</sup>H NMR and <sup>13</sup>C NMR of compound **3ah**

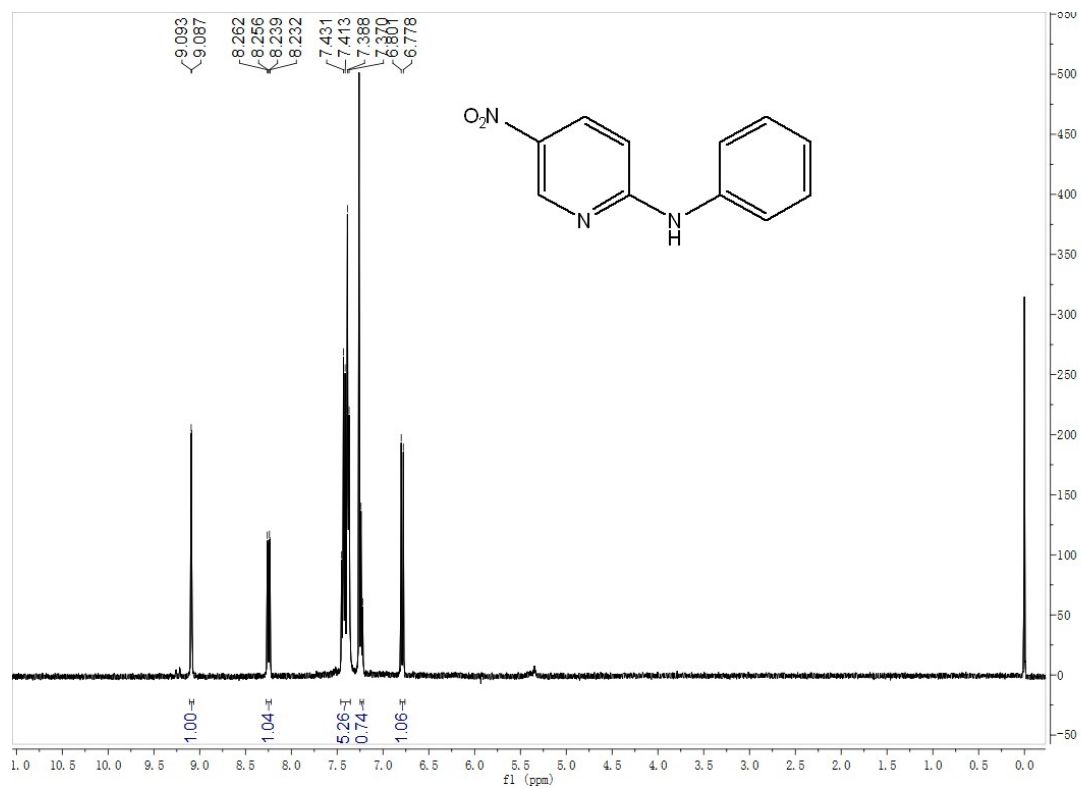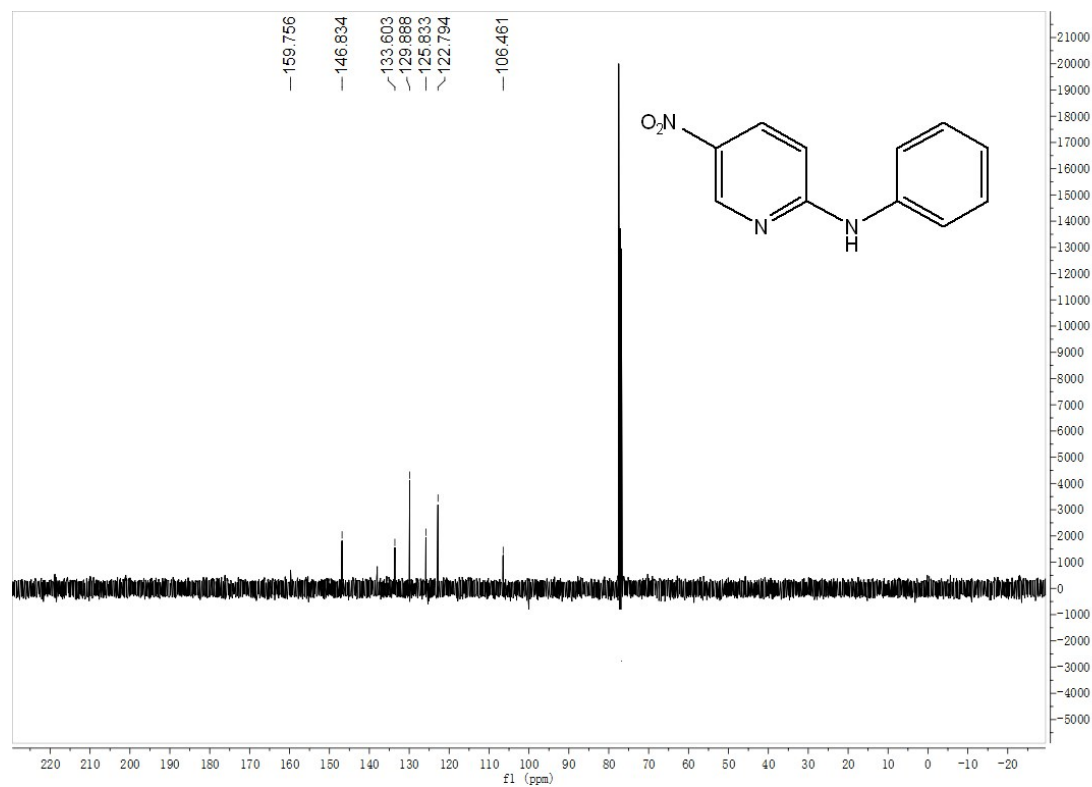

<sup>1</sup>H NMR and <sup>13</sup>C NMR of compound 5a

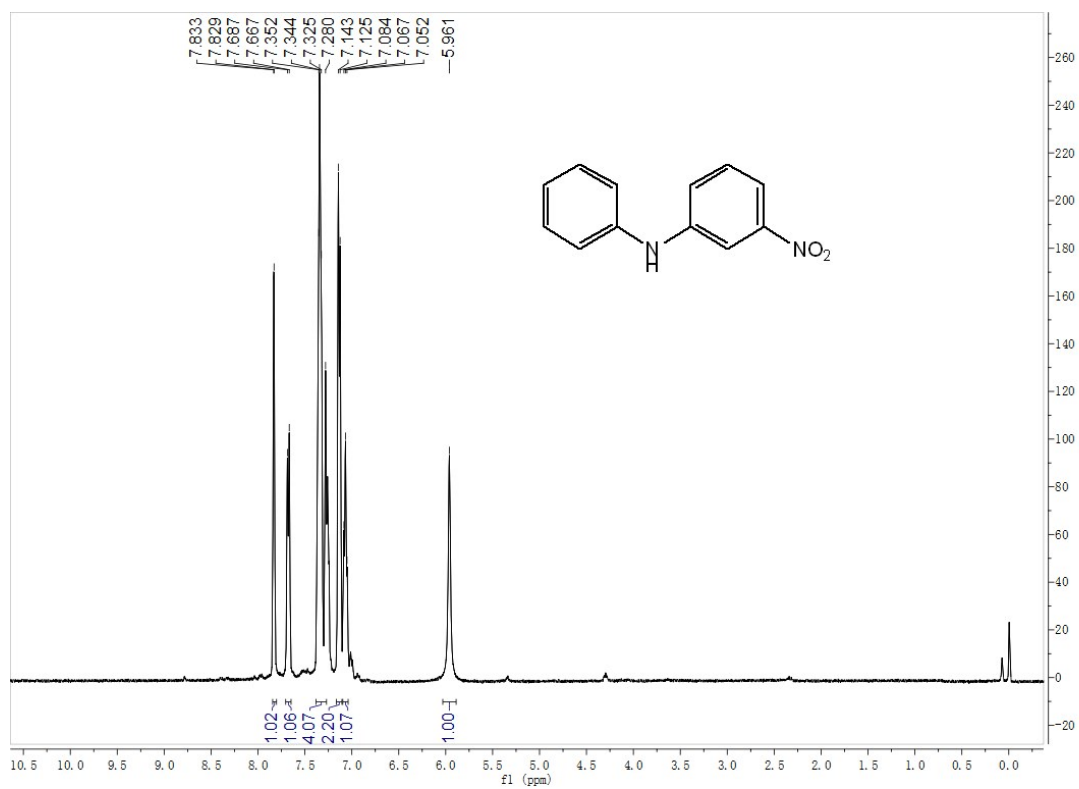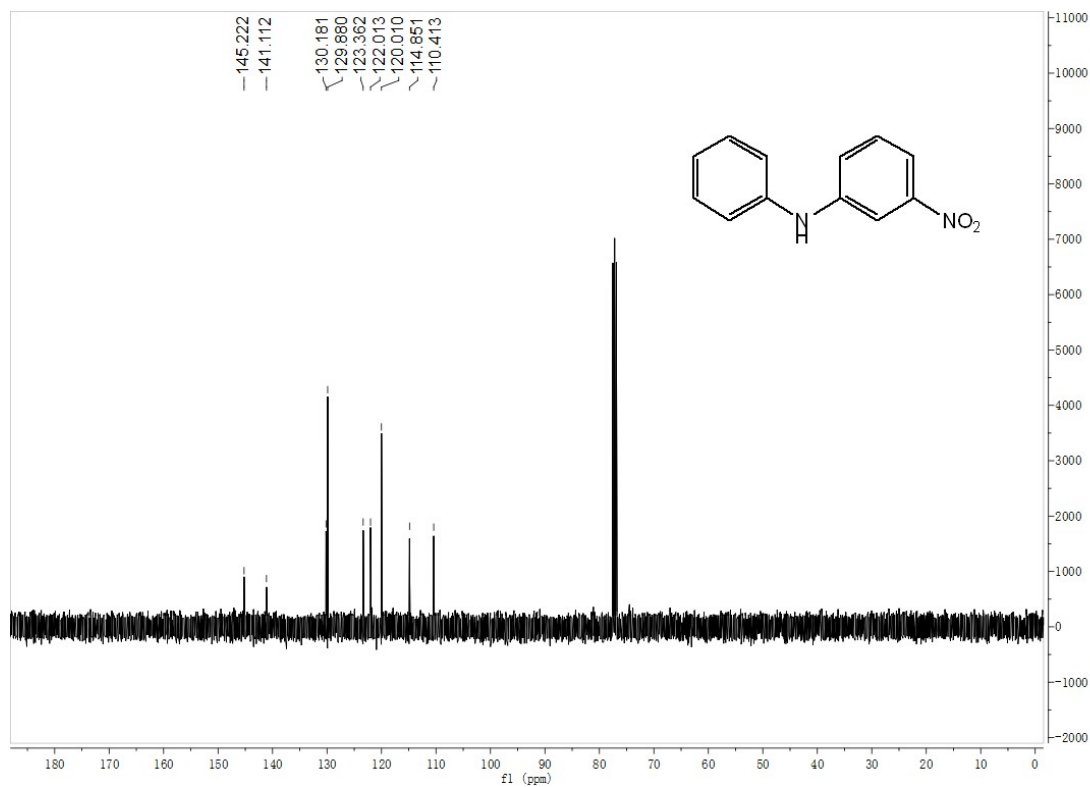

<sup>1</sup>H NMR and <sup>13</sup>C NMR of compound **5b**

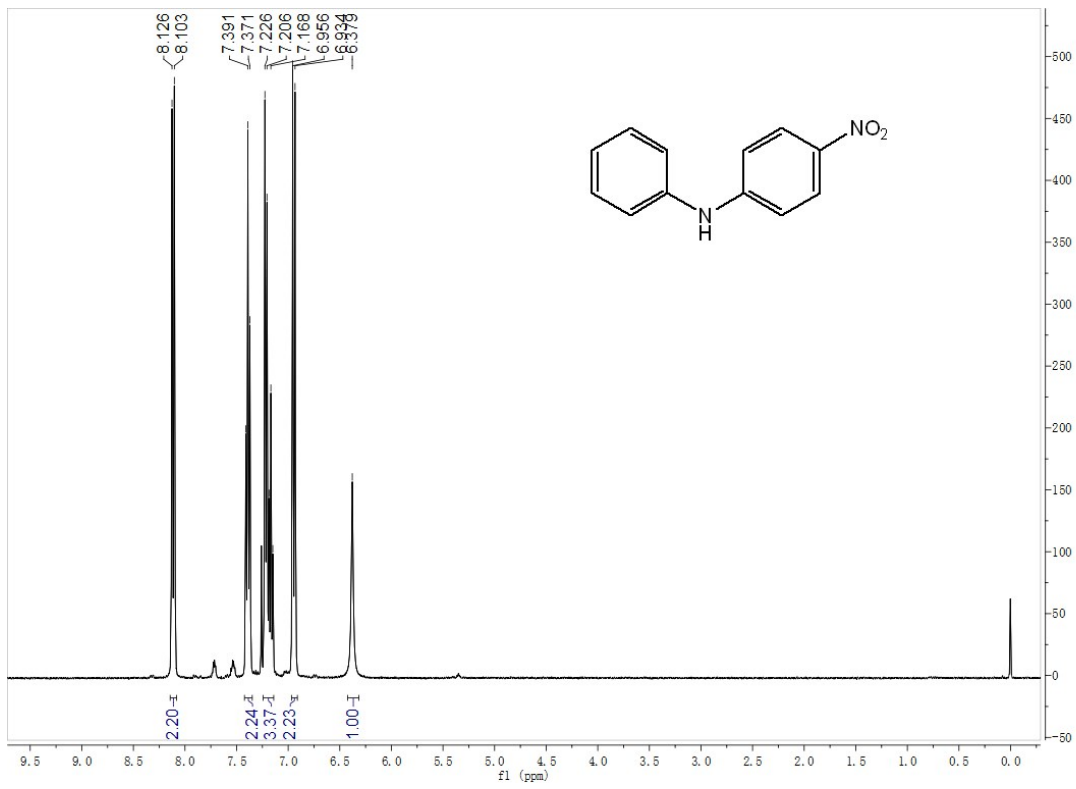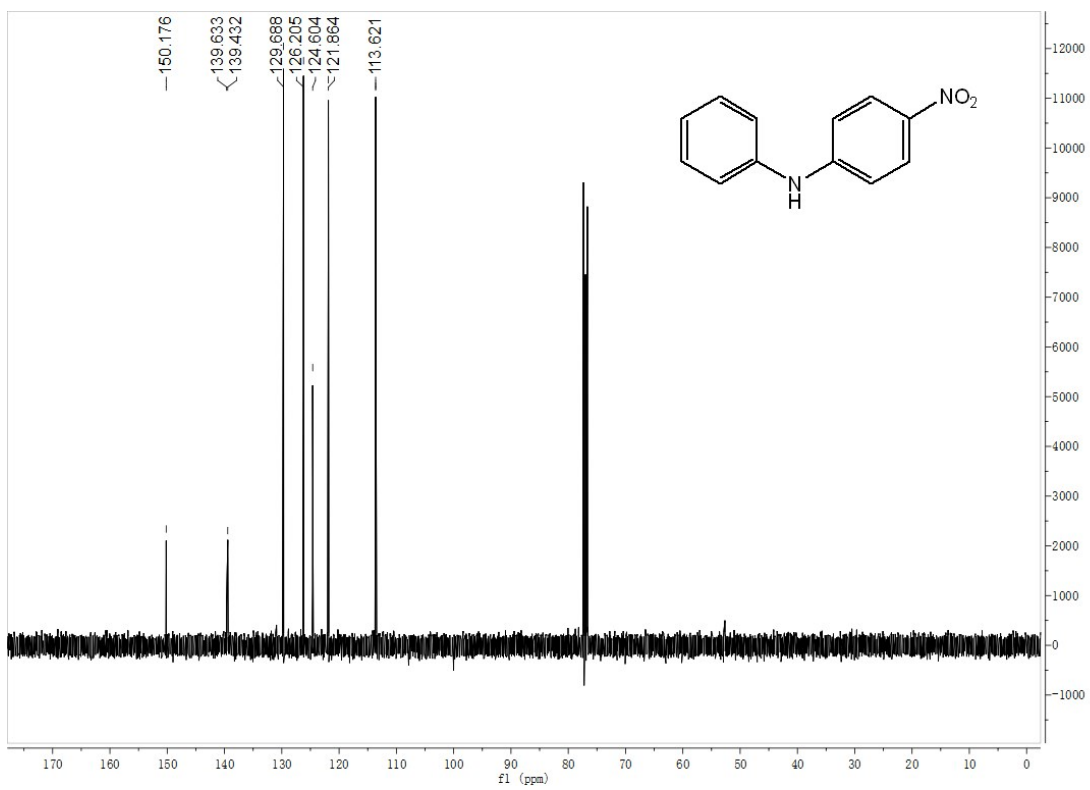

Supplement: d0gc03400b1.pdf [file d0gc03400b1.pdf]
